# Supplementary material
Source: PubMed Central journal article supplement (PMC5522755)
Supplement: NIHMS864577-supplement-ESI.pdf [file NIHMS864577-supplement-ESI.pdf]

# Enantioselective Diels-Alder-Lactamization Organocascades Employing Furan-Based Dienes

Mikail E. Abbasov,<sup>†</sup> Brandi M. Hudson,<sup>‡</sup> Weixu Kong,<sup>†</sup> Dean J. Tantillo<sup>‡,\*</sup> and Daniel  
Romo<sup>†,\*</sup>

<sup>†</sup>*Department of Chemistry and Biochemistry, Baylor University, One Bear Place 97348,  
Waco, Texas 76798, United States*

<sup>‡</sup>*Department of Chemistry, University of California–Davis, One Shields Avenue, Davis,  
California 95616, United States*

## Table of Contents

|                                                                                                                                                                                                                                                                    |     |
|--------------------------------------------------------------------------------------------------------------------------------------------------------------------------------------------------------------------------------------------------------------------|-----|
| General procedures and abbreviation list.....                                                                                                                                                                                                                      | S2  |
| Representative examples of the DAL process with furanyl alcohols ( <b>Table S1</b> ).....                                                                                                                                                                          | S4  |
| Representative procedure for the DAL process as described for $\gamma$ -lactam (+)- <b>10</b> .....                                                                                                                                                                | S5  |
| Representative procedure for varying the <i>N</i> -substituent on amino furans <b>8a-i</b> in the DAL<br>process with acid chloride <b>11</b> providing lactams <b>12a-i</b> as described for bicyclic $\gamma$ -lactam<br>(+)- <b>12a</b> ( <b>Table 1</b> )..... | S7  |
| Synthetic applications of $\gamma$ -lactam (+)- <b>12a</b> .....                                                                                                                                                                                                   | S11 |
| Single crystal X-ray structures and selected crystallographic data for compound (+)- <b>14</b><br>( <b>Figures S1</b> ).....                                                                                                                                       | S12 |
| Details of computational study of the Diels-Alder step in the DAL process.....                                                                                                                                                                                     | S17 |
| <sup>1</sup> H and <sup>13</sup> C NMR spectra.....                                                                                                                                                                                                                | S91 |
| Chiral HPLC determinations of enantiomeric excess of tricyclic $\gamma$ -lactams (+)- <b>10</b> and<br>(+)- <b>12a</b> ( <b>Figures S2</b> ).....                                                                                                                  | S97 |

## General Procedures

All non-aqueous reactions were performed under a nitrogen atmosphere in oven-dried glassware. Dichloromethane (CH<sub>2</sub>Cl<sub>2</sub>), tetrahydrofuran (THF), diethyl ether (Et<sub>2</sub>O), acetonitrile (CH<sub>3</sub>CN) and toluene (PhMe) were dried by passing through activated alumina (solvent purification system). (*E*)-4,4,4-trifluoro-2-butenic acid was purchased from Oakwood Chemical and used as received. Other solvents and reagents were used as received from commercially available sources. Deuterated solvents were purchased from Cambridge Isotopes and used as received. <sup>1</sup>H NMR spectra were measured at 500 MHz and referenced relative to residual chloroform (7.26 ppm) and were reported in parts per million. Coupling constants (*J*) were reported in Hertz (Hz), with multiplicity reported following usual convention: s, singlet; d, doublet; t, triplet; q, quartet; dd, doublet of doublets; dt, doublet of triplets; td, triplet of doublets; ddd, doublet of doublet of doublets; m, multiplet. <sup>13</sup>C NMR spectra were measured at 125 MHz and referenced relative to residual chloroform (77.23 ppm) and were reported in parts per million (ppm). Flash column chromatography was performed with 60Å Silica Gel (230-400 mesh) as stationary phase on an automated flash chromatography system (EtOAc/hexanes as eluent unless indicated otherwise). High-resolution mass spectra (ESI) were obtained through the Laboratory for Biological Mass Spectrometry (Texas A&M University). Thin Layer Chromatography (TLC) was performed using glass-backed silica gel F254 (Silicycle, 250 μm thickness). Visualization of developed plates was performed by fluorescence quenching or by treating with Seebach's<sup>1</sup> staining solution. *Fourier Transform Infrared* (FTIR) spectra were recorded as thin films on NaCl plates. Optical rotations were recorded on a polarimeter at 589 nm employing a 25 mm cell. High Performance Liquid Chromatography (HPLC) was performed on a chromatographic system using various chiral columns (25 cm) as noted. X-ray diffraction was obtained by the X-ray Diffraction Laboratory at Texas A&M University. (*S*)-(-)-BTM and (*S*)-(-)-TM·HCl were purchased from TCI chemicals and used as

---

<sup>1</sup> D. Seebach, R. Imwinkelried and G. Stucky, *Helv. Chim. Acta.*, 1987, **70**, 448.

received. All unsaturated acid chlorides were purchased from Sigma-Aldrich and used as received without further purification. Protected furanyl amines **8a,h,i**,<sup>2</sup> **8b**,<sup>3</sup> **8c**,<sup>4</sup> **8d**,<sup>5</sup> **8e**,<sup>6</sup> **8f**,<sup>7</sup> **8g**,<sup>8</sup> were prepared according to the literature procedures.

#### Abbreviation List

|                |   |                                                |
|----------------|---|------------------------------------------------|
| (S)-(-)-BTM    | = | (S)-(-)-benzotetramisole                       |
| (S)-(-)-TM·HCl | = | (S)-(-)-tetramisole (levamisole) hydrochloride |
| mCPBA          | = | meta-chloroperoxybenzoic acid                  |

---

<sup>2</sup> A. Kamal, J. S. Reddy, E. V. Bharathi and D. Dastagiri, *Tetrahedron Lett.*, 2008, **49**, 348. Compounds **8h** and **8i** were prepared in a similar fashion.

<sup>3</sup> N. Choony, N. Kuhnert, P. G. Sammes, G. Smith and R. W. Ward, *J. Chem. Soc. Perk. Trans. 1*, 2002, **17**, 1999.

<sup>4</sup> S. V. Chankeshwara, A. K. Chakraborti, *Synthesis*, 2006, **16**, 2784.

<sup>5</sup> K. Yeung; Knaus, *Eur. J. Med. Chem.*, 1986, **21**, 181.

<sup>6</sup> M. E. Jung, J. Gervay, *J. Am. Chem. Soc.*, 1991, **113**, 224.

<sup>7</sup> J. Roger, H. Doucet, *Eur. J. Org. Chem.*, 2010, **23**, 4412.

<sup>8</sup> S. Yrjölä, T. Parkkari, D. Navia-Paldanius, T. Laitinen, A. A. Kaczor, T. Kokkola, F. Adusei-Mensah, J. R. Savinainen, J. T. Laitinen, A. Poso, A. Alexander, J. Penman, L. Stott, M. Anskat, A. J. Irving, T. J. Nevalainen, *Eur. J. Med. Chem.*, 2016, **107**, 119.

**Representative examples of the DAL process with furanyl alcohols (Table S1):** Ester **S3**,<sup>9</sup> alcohol **S4**,<sup>10</sup> cycloadduct **S5**<sup>11</sup> are known compounds.

**Table S1.** Representative examples of the DAL process with furanyl alcohols.<sup>†</sup>

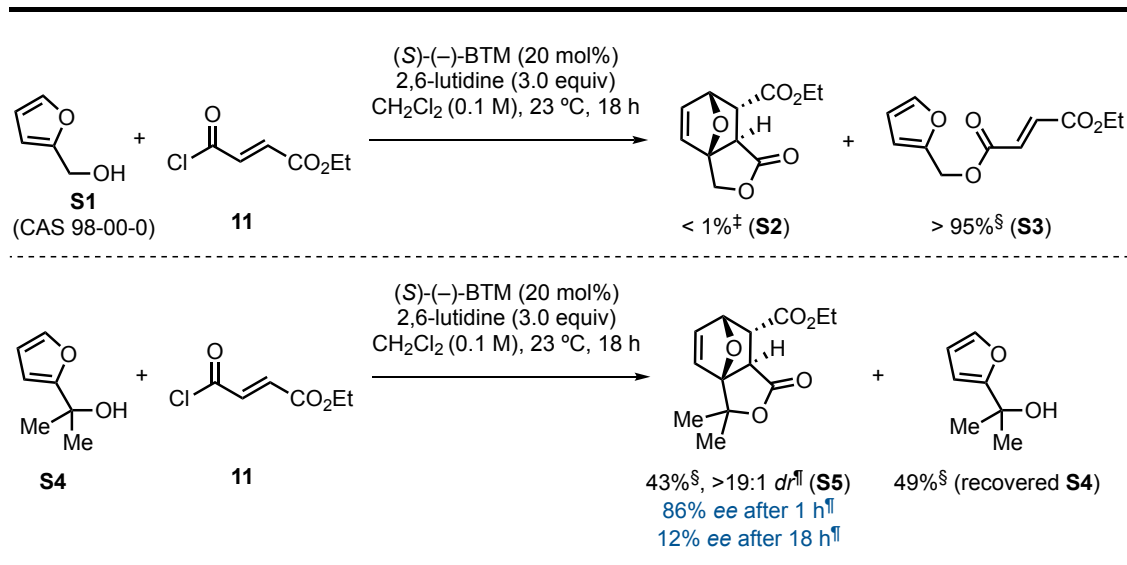

<sup>†</sup>Reactions were performed with dienes **S1**, **S4** (1.0 equiv), ethyl fumaroyl chloride (**11**) (1.2 equiv), (S)-(-)-BTM (20 mol%) and 2,6-lutidine (3.0 equiv) in CH<sub>2</sub>Cl<sub>2</sub> (0.1 M) at ambient temperature (23 °C) for 18 h. <sup>‡</sup>The desired cycloadduct **S2** was not detected (< 1%) by LC/MS and <sup>1</sup>H NMR (500 MHz) analysis of the crude reaction mixture. <sup>§</sup>A known amount of CH<sub>2</sub>Cl<sub>2</sub> was added to the reaction contents at the end of the reaction to serve as an internal standard. Percent conversions were determined by <sup>1</sup>H NMR (500 MHz) integration of product (**S3**, **S5** or recovered **S4**) resonances versus the 5.2 ppm resonance of CH<sub>2</sub>Cl<sub>2</sub>. <sup>¶</sup>Diastereomeric (*endo/exo*) ratio of **S5** was determined by <sup>1</sup>H NMR (500 MHz) analysis of the crude reaction mixture. Enantiomeric excess (*ee*) of **S5** was determined by chiral-phase HPLC analysis of the crude reaction mixture.

<sup>9</sup> T. Jumina, Z. Iqmal and A. Karim, *Indonesian J. Pharm.*, 2002, **13**, 207.

<sup>10</sup> G. W. Gribble, D. J. Keavy, S. E. Branz, W. J. Kelly and M. A. Pals, *Tetrahedron Lett.*, 1988, **29**, 6227.

<sup>11</sup> M. E. Jung and J. Gervay, *J. Am. Chem. Soc.*, 1989, **111**, 5469.



**Representative procedure for the DAL process as described for  $\gamma$ -lactam (+)-10:**

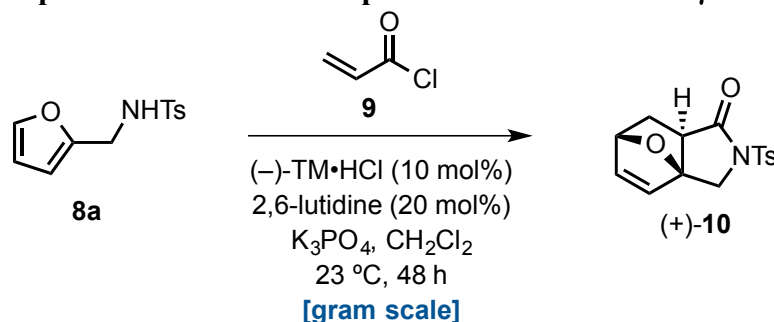

**(3aS,6S,7aR)-2-tosyl-2,3,7,7a-tetrahydro-3a,6-epoxyisoindol-1(6H)-one ((+)-10):** To an oven-dried, 25-mL round-bottomed flask equipped with a magnetic stir bar was added furanyldiene sulfonamide **8a** (4.60 g, 18.3 mmol, 1.0 equiv), (-)-Levamisole·HCl (442 mg, 1.83 mmol, 10 mol%), 2,6-lutidine (0.43 mL, 3.66 mmol, 20 mol%),  $K_3PO_4$  (9.7 g, 45.8 mmol, 2.5 equiv) and anhydrous  $CH_2Cl_2$  (185 mL, to make final concentration of furanyldiene sulfonamide **8a**, 0.1 M) at ambient temperature (23 °C). With vigorous stirring, acryloyl chloride **9** (1.8 mL, 21.9 mmol, 1.2 equiv) in  $CH_2Cl_2$  (1.2 mL) was added over a period of 5 min. After stirring for an additional 48 h, the reaction mixture was filtered through a pad of Celite and concentrated by rotary evaporation. Purification by automated flash chromatography (10→80% EtOAc/hexanes) afforded a single diastereomer (as judged by  $^1H$  NMR) of tricyclic  $\gamma$ -lactam **(+)-10** (4.24 g, 76% yield, 91% *ee*) as a white solid: TLC (EtOAc:hexanes, 1:1 *v/v*):  $R_f$  = 0.44;  $[\alpha]_D^{20.0} = +5.88$  ( $c = 3.40$ ,  $CHCl_3$ ). Enantiomeric excess was determined by chiral HPLC analysis in comparison with authentic racemic material using a Chiralcel AS-H column: hexanes:<sup>i</sup>PrOH = 40:60, flow rate 1.0 mL/min,  $\lambda = 230$  nm:  $t_{minor} = 12.1$  min,  $t_{major} = 14.8$  min; 91% *ee*. Absolute stereochemistry was assigned by analogy to epoxide **(+)-14**.  $^1H$  NMR (500 MHz;  $CDCl_3$ ):  $\delta$  7.90 (d,  $J = 8.3$  Hz, 2H), 7.32 (d,  $J = 8.5$  Hz, 2H), 6.41 (dd,  $J = 5.8, 1.6$  Hz, 1H), 6.38 (d,  $J = 5.8$  Hz, 1H), 4.98 (dd,  $J = 4.5, 1.5$  Hz, 1H), 4.45 (d,  $J = 12.0$  Hz, 1H), 4.32 (d,  $J = 12.0$  Hz, 1H), 2.55 (dd,  $J = 8.7, 3.2$  Hz, 1H), 2.42 (s, 3H), 2.09 (dt,  $J = 11.9, 3.9$  Hz, 1H), 1.55 (dd,  $J = 12.0, 8.7$  Hz, 1H);  $^{13}C$  NMR (125 MHz;  $CDCl_3$ ):  $\delta$  172.6, 145.1, 138.0, 135.2, 132.3, 129.7 (2), 128.0 (2), 87.8, 78.9, 49.9, 48.3,

28.9, 21.7; IR (thin film): 2956, 1741  $\text{cm}^{-1}$ ; HRMS (ESI+)  $m/z$  calcd for  $\text{C}_{15}\text{H}_{16}\text{NO}_4\text{S}$   $[\text{M}+\text{H}]^+$ : 306.0800, found: 306.0811.

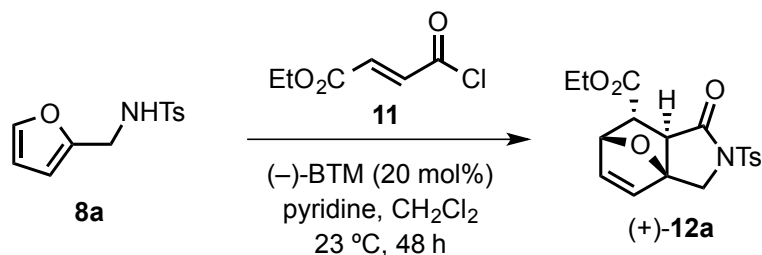

**Ethyl (3a*S*,6*R*,7*R*,7a*R*)-1-oxo-2-tosyl-1,2,3,6,7,7a-hexahydro-3a,6-epoxyisoindole-7-carboxylate ((+)-12a):** Prepared according to the representative procedure using furanyldiene sulfonamide **8a** (360 mg, 1.43 mmol, 1.0 equiv), (*S*)-(-)-BTM (72 mg, 0.143 mmol, 20 mol%), pyridine (0.13 mL, 1.57 mmol, 1.1 equiv) in anhydrous  $\text{CH}_2\text{Cl}_2$  (14.5 mL, to make initial concentration of furanyldiene sulfonamide 0.1 M) and ethyl fumaroyl chloride **11** (0.23 mL, 1.72 mmol, dissolved in 0.7 mL  $\text{CH}_2\text{Cl}_2$ , 1.2 equiv, added by syringe pump over 5 h) at ambient temperature ( $23\text{ }^\circ\text{C}$ ). Upon completion (as judged by TLC), the reaction mixture was purified by automated flash chromatography (10→80% EtOAc/hexanes) to afford a single *endo* diastereomer (as judged by  $^1\text{H}$  NMR) of tricyclic  $\gamma$ -lactam (+)-**12a** (460 mg, 85% yield, 94% *ee*) as an off-white solid: TLC (EtOAc:hexanes, 1:1 *v/v*):  $R_f = 0.62$ ;  $[\alpha]_D^{19.9} +72.63$  ( $c = 3.80$ ,  $\text{CHCl}_3$ ). Enantiomeric excess was determined by chiral HPLC analysis in comparison with authentic racemic material using a Chiralcel AD-H column: hexanes:*i*PrOH = 60:40, flow rate 0.5 mL/min,  $\lambda = 230\text{ nm}$ :  $t_{\text{minor}} = 27.2\text{ min}$ ,  $t_{\text{major}} = 30.9\text{ min}$ ; 94% *ee*. Absolute stereochemistry was assigned by analogy to epoxide (+)-**14**.  $^1\text{H}$  NMR (500 MHz;  $\text{CDCl}_3$ ):  $\delta$  7.91 (d,  $J = 8.4\text{ Hz}$ , 2H), 7.33 (d,  $J = 8.0\text{ Hz}$ , 2H), 6.53 (d,  $J = 5.8\text{ Hz}$ , 1H), 6.34 (dd,  $J = 5.8, 1.6\text{ Hz}$ , 1H), 5.18 (dd,  $J = 4.9, 1.5\text{ Hz}$ , 1H), 4.45 (d,  $J = 12.2\text{ Hz}$ , 1H), 4.31 (d,  $J = 12.2\text{ Hz}$ , 1H), 4.09 (q,  $J = 7.1\text{ Hz}$ , 2H), 3.36 (dd,  $J = 4.8, 3.4\text{ Hz}$ , 1H), 3.03 (d,  $J = 3.3\text{ Hz}$ , 1H), 2.44 (s, 3H), 1.22 (t,  $J = 7.1\text{ Hz}$ , 3H);  $^{13}\text{C}$  NMR (125 MHz;  $\text{CDCl}_3$ ):  $\delta$  171.1, 169.6, 145.3, 135.8, 134.9, 134.31, 134.30, 129.7 (2), 128.1 (2), 89.1, 80.2, 61.4, 52.1, 49.8, 47.6, 21.7, 14.1; IR (thin film): 2983, 1734  $\text{cm}^{-1}$ ; HRMS (ESI+)  $m/z$  calcd for  $\text{C}_{18}\text{H}_{20}\text{NO}_6\text{S}$   $[\text{M}+\text{H}]^+$ : 378.1011, found: 378.1018.

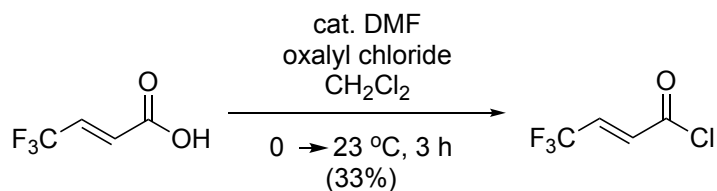

**Synthesis of (E)-4,4,4-trifluoro-2-butenoyl chloride 11b.**<sup>12</sup> To a solution of (E)-4,4,4-trifluoro-2-butenoic acid (520 mg, 3.70 mmol, 1.0 equiv) in 6 mL CH<sub>2</sub>Cl<sub>2</sub> was added dry DMF (14 mL, 0.18 mmol, 0.05 equiv), followed by dropwise addition of oxalyl chloride (0.38 mL, 4.4 mmol, 1.2 equiv) at 0 °C. The reaction mixture was warmed to 23 °C and stirring was continued for 3 h. The reaction was then concentrated carefully (23 °C, 300-350 mbar) to afford 193 mg (33%) of the volatile acid chloride **11b** as a yellow solid. The product is readily hydrolyzed and volatile so was directly used in the subsequent DAL without purification. <sup>1</sup>H NMR (400 MHz, CDCl<sub>3</sub>) δ 6.92 (dq, *J* = 15.5, *J*<sub>H-F</sub> = 6.2 Hz, 1H), 6.70 (dq, *J* = 15.5, *J*<sub>H-F</sub> = 1.8 Hz, 1H).

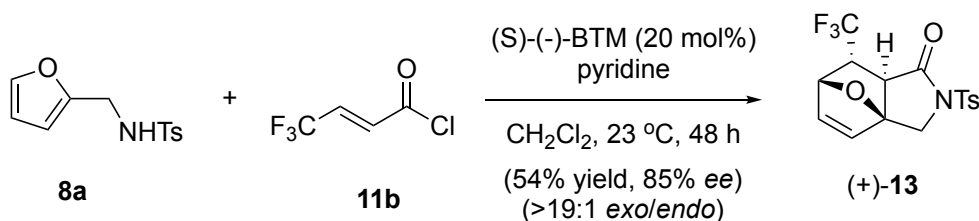

**(3a*S*,6*R*,7*R*,7a*R*)-2-tosyl-7-(trifluoromethyl)-2,3,7,7a-tetrahydro-3a,6-epoxyisoindol-1(6*H*)-one (13).** The procedure employed was nearly identical to that used for fumaroyl chloride described above. Furanyl sulfonamide **8a** (134 mg, 0.5 mmol, 1.0 equiv), (S)-(-)-BTM (25 mg, 0.1 mmol, 20 mol%), and pyridine (47 μL, 0.55 mmol, 1.1 equiv) was dissolved in anhydrous CH<sub>2</sub>Cl<sub>2</sub> (5.0 mL, to make the initial concentration of furanyl sulfonamide 0.1 M). Trifluorocrotonyl chloride **11b** (98 mg,

<sup>12</sup> K. Hobel, P. Margaretha *Res. Chem. Int.* 1989, **12**, 263. This acid chloride is commercially available from Sigma-Aldrich but expensive.

0.6 mmol, 1.2 equiv, dissolved in 0.5 mL CH<sub>2</sub>Cl<sub>2</sub>) was added by syringe pump over 5 h at ambient temperature (23 °C). Upon completion (as judged by TLC), the reaction mixture was purified by automated flash chromatography (0→100% EtOAc/hexanes) to afford a single *endo* diastereomer (as judged by <sup>1</sup>H NMR) of tricyclic  $\gamma$ -lactam (+)-**13** (101 mg, 54% yield, 85% ee) as an off-white solid: TLC (EtOAc:hexanes, 1:1 v/v): R<sub>f</sub> = 0.65; [ $\alpha$ ]<sub>D</sub><sup>25</sup> +27.20 (*c* 1.0, CHCl<sub>3</sub>). Enantiomeric excess was determined by chiral HPLC analysis in comparison with authentic racemic material using a Chiralcel AD-H column: hexanes:<sup>i</sup>PrOH = 60:40, flow rate 1.0 mL/min,  $\lambda$  = 230 nm: t<sub>minor</sub> = 8.6 min, t<sub>major</sub> = 7.8 min; 85% ee. <sup>1</sup>H NMR (400 MHz, CDCl<sub>3</sub>)  $\delta$  7.91 (d, *J* = 8.1 Hz, 2H), 7.33 (d, *J* = 8.1 Hz, 2H), 6.57 (d, *J* = 5.8 Hz, 1H), 6.42 (app dt, *J* = 6.0, 1.7 Hz, *J*<sub>H-F</sub> = 1.7 Hz, 1H), 5.09 (dd, *J* = 4.4, 1.6 Hz, 1H), 4.47 (d, *J* = 12.3 Hz, 1H), 4.33 (d, *J* = 12.3 Hz, 1H), 3.12 (m, 1H), 2.68 (d, *J* = 4.0 Hz, 1H), 2.43 (s, 3H). <sup>13</sup>C NMR (101 MHz, CDCl<sub>3</sub>)  $\delta$  169.9, 145.6, 135.3, 134.7, 134.4, 129.8, 128.1, 124.4(q, *J* = 278.8 Hz), 89.3, 78.7(q, *J* = 2.6 Hz), 58.8(q, *J* = 2.0 Hz), 49.7, 46.5(q, *J* = 28.7 Hz), 21.7. IR (thin film): 2925, 1737 cm<sup>-1</sup>; HRMS (ESI+) *m/z* calcd for C<sub>16</sub>H<sub>14</sub>F<sub>3</sub>NO<sub>4</sub>SNa [M+Na]<sup>+</sup>: 396.0493, found: 396.0490.

**Representative procedure for varying the *N*-substituent on amino furans **8a-i** in the DAL process with acid chloride **11** providing lactams **12a-i** as described for bicyclic  $\gamma$ -lactam (+)-**12a** (Table 1, entry 13):**

Into a dried, 2-mL clear-glass vial (12 × 32 mm) equipped with a magnetic stir bar was added amino furan **8a** (25 mg, 0.10 mmol, 1.0 equiv), (*S*)-(-)-BTM (5 mg, 0.020 mmol, 20 mol%), pyridine (24  $\mu$ L, 0.30 mmol, 3.0 equiv) and anhydrous CH<sub>2</sub>Cl<sub>2</sub> (1.0 mL, to make final concentration of the furanyl alcohol 0.1 M) at ambient temperature (23 °C). With vigorous stirring, ethyl fumaroyl chloride **11** (16  $\mu$ L, 0.12 mmol, 1.2 equiv) was added dropwise by syringe pump over 5 h. After stirring for an additional 43 h, the reaction mixture was purified by automated flash chromatography (10→80% EtOAc/hexanes) to afford a single *endo* diastereomer (as judged by <sup>1</sup>H NMR) of tricyclic

$\gamma$ -lactam (+)-**12a** (30 mg, 82% yield, 94% *ee*) as an off-white solid: All spectral data matched that reported on pages S6, S87.

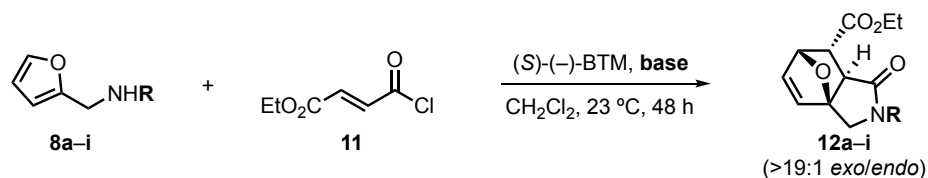

| entry           | R (21a-i)                      | catalyst loading (mol%) | base         | ee (yield <sup>†</sup> ) % |
|-----------------|--------------------------------|-------------------------|--------------|----------------------------|
| 1               | CPh <sub>3</sub> ( <b>8b</b> ) | 100                     | 2,6-lutidine | <i>n.r.</i>                |
| 2               | Boc ( <b>8c</b> )              | 100                     | 2,6-lutidine | <i>n.r.</i>                |
| 3               | Bz ( <b>8d</b> )               | 100                     | 2,6-lutidine | <i>n.r.</i>                |
| 4               | ( <b>8e</b> )                  | 100                     | 2,6-lutidine | <i>n.r.</i>                |
| 5               | Bn ( <b>8f</b> )               | 100                     | 2,6-lutidine | 3 (92)                     |
| 6               | ( <b>8g</b> )                  | 0                       | 2,6-lutidine | – (28)                     |
| 7               | ( <b>8g</b> )                  | 100                     | 2,6-lutidine | 40 (46)                    |
| 8               | ( <b>8h</b> )                  | 100                     | 2,6-lutidine | 51 (40)                    |
| 9               | (Ts, <b>8a</b> )               | 100                     | 2,6-lutidine | 70 (75)                    |
| 10              | ( <b>8i</b> )                  | 100                     | 2,6-lutidine | 75 (82)                    |
| 11              | Ts                             | 20                      | 2,6-lutidine | 42 (86)                    |
| 12              | Ts                             | 20                      | pyridine     | 83 (88)                    |
| 13 <sup>‡</sup> | Ts                             | 20                      | pyridine     | 94 (85)                    |

<sup>a</sup>Screening studies were performed with dienes **8a–i** (1.0 equiv), ethyl fumaroyl chloride **11** (1.2 equiv), (S)-(-)-BTM (20–100 mol%) and Brønsted base (1.0 equiv) in CH<sub>2</sub>Cl<sub>2</sub> (0.1 M). <sup>†</sup>All yields refer to isolated, purified yields of cycloadducts. Diastereomeric (*endo/exo*) ratios were determined by <sup>1</sup>H NMR (500 MHz) analysis of the crude reaction mixture. Enantiomeric excess (*ee*) was determined by chiral phase HPLC. <sup>‡</sup>Acid chloride **11** was added as a solution in CH<sub>2</sub>Cl<sub>2</sub> by syringe pump over 5 h.

### Synthetic applications of $\gamma$ -lactam (+)-12a:

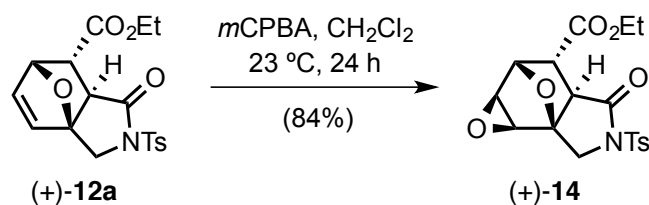

**Ethyl (1aS,2S,3R,3aR,6aS,6bS)-4-oxo-5-tosyloctahydro-2,6a-epoxyxireno[2,3-elisoindole-3-carboxylate ((+)-14):** Under ice cooling (0 °C), (+)-12a (70 mg, 0.19 mmol, 1.0 equiv) was dissolved in CH<sub>2</sub>Cl<sub>2</sub> (2.0 mL, to make initial concentration of (+)-12a 0.1 M). After stirring for 10 min, a solution of *m*CPBA (70–75%, 182 mg, 0.74 mmol, 4.0 equiv) in CH<sub>2</sub>Cl<sub>2</sub> (2.0 mL) was slowly added. The solution was stirred for 24 h at 23 °C. The reaction mixture was purified by automated flash chromatography system (20→80% EtOAc/hexanes) providing 61 mg (76% yield) of epoxide (+)-14 as a clear colorless oil. Recrystallization from CH<sub>2</sub>Cl<sub>2</sub> using a slow evaporation method provided crystals suitable for X-ray analysis: m.p. 184–187 °C; TLC (EtOAc:hexanes, 1:1 v/v): R<sub>f</sub> = 0.44;  $[\alpha]_D^{19.7}$  +43.81 (*c* = 0.21, CHCl<sub>3</sub>). Absolute stereochemistry was assigned based on X-ray analysis using anomalous dispersion (**Figure S1**). <sup>1</sup>H NMR (500 MHz; CDCl<sub>3</sub>): δ 7.89 (d, *J* = 8.1 Hz, 2H), 7.33 (d, *J* = 8.3 Hz, 2H), 4.70 (d, *J* = 5.2 Hz, 1H), 4.35 (d, *J* = 12.4 Hz, 1H), 4.28 (d, *J* = 12.3 Hz, 1H), 4.19 (q, *J* = 7.1 Hz, 2H), 3.56 (dd, *J* = 3.2, 0.8 Hz, 1H), 3.43 (dd, *J* = 3.3, 0.7 Hz, 1H), 3.33 (t, *J* = 4.4 Hz, 1H), 3.26 (d, *J* = 3.8 Hz, 1H), 2.44 (s, 3H), 1.28 (td, *J* = 7.1, 0.9 Hz, 3H); <sup>13</sup>C NMR (125 MHz; CDCl<sub>3</sub>): δ 170.4, 168.7, 145.5, 134.7, 129.8 (2), 128.1 (2), 84.9, 76.3, 62.0, 52.5, 51.0, 48.6, 48.31, 48.19, 21.7, 14.2; IR (thin film): 2984, 1734, 1171 cm<sup>-1</sup>; HRMS (ESI+) *m/z* calcd for C<sub>18</sub>H<sub>20</sub>NO<sub>7</sub>S [M+H]<sup>+</sup>: 394.0960, found: 394.0972.

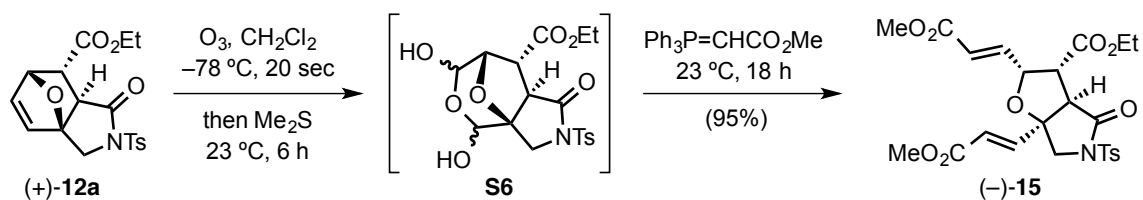

**Dimethyl 3,3'-((2R,3R,3aR,6aS)-3-(ethoxycarbonyl)-4-oxo-5-tosylhexahydro-6aH-furo[2,3-c]pyrrole-2,6a-diyl)(2E,2'E)-diacrylate ((-)-15):** A solution of tricyclic  $\gamma$ -lactam (+)-**12a** (200 mg, 0.53 mmol, 1.0 equiv) was dissolved in  $\text{CH}_2\text{Cl}_2$  (10.0 mL, to make initial concentration of (+)-**12a** 0.05 M) and cooled to  $-78\text{ }^\circ\text{C}$ . Ozone was bubbled through the reaction solution until a blue color persisted. Excess ozone was removed by blowing  $\text{N}_2$  gas into the solution with stirring for 10 min. Dimethylsulfide (0.70 mL, 10.6 mmol, 20.0 equiv) was added by syringe and the reaction was slowly warmed to ambient temperature ( $23\text{ }^\circ\text{C}$ ) over 6 h at which time TLC indicated the reaction was complete.  $^1\text{H}$  NMR analysis from an aliquot of the crude reaction mixture indicated the formation of **S6** intermediate. To a resultant crude mixture of **S6** was added at once methyl (triphenylphosphoranylidene)acetate (445 mg, 1.33 mmol, 2.5 equiv). The solution was stirred for 18 h at  $23\text{ }^\circ\text{C}$ . The reaction mixture was purified by automated flash chromatography system (5 $\rightarrow$ 50% EtOAc/hexanes) providing 262 mg (95% yield) of lactam (-)-**15** as a clear colorless oil: TLC (EtOAc:hexanes, 1:1 v/v):  $R_f = 0.66$ ;  $[\alpha]_D^{20.1} -36.87$  ( $c = 1.15$ ,  $\text{CHCl}_3$ ).  $^1\text{H}$  NMR (500 MHz;  $\text{CDCl}_3$ ):  $\delta$  7.91 (d,  $J = 8.4$  Hz, 2H), 7.37 (d,  $J = 8.4$  Hz, 2H), 7.01 (d,  $J = 15.5$  Hz, 1H), 6.86 (dd,  $J = 15.6, 4.9$  Hz, 1H), 6.16 (d,  $J = 15.5$  Hz, 1H), 6.06 (dd,  $J = 15.6, 1.7$  Hz, 1H), 4.57 (ddd,  $J = 6.5, 4.9, 1.7$  Hz, 1H), 4.16-3.97 (m, 5H), 3.75 (s, 3H), 3.75 (s, 3H), 3.52-3.45 (m, 1H), 2.46 (s, 3H), 1.14 (t,  $J = 7.1$  Hz, 3H).  $^{13}\text{C}$  NMR (125 MHz;  $\text{CDCl}_3$ ):  $\delta$  170.7, 168.4, 166.08, 165.89, 146.0, 145.7, 145.4, 141.5, 134.3, 130.0 (2), 128.1 (2), 122.0, 121.7, 83.8, 80.2, 61.7, 56.8, 56.1, 52.1, 51.8, 21.8, 13.9; IR (thin film): 2985, 2954, 1728, 1665, 1597  $\text{cm}^{-1}$ ; HRMS (ESI+)  $m/z$  calcd for  $\text{C}_{24}\text{H}_{28}\text{NO}_{10}\text{S}$   $[\text{M}+\text{H}]^+$ : 522.1434, found: 522.1433.





**Table 1. Crystal data and structure refinement for DRB\_MA\_150407\_G\_EpoN.**

| Crystal Parameters              | Crystal Data                                                                                       |
|---------------------------------|----------------------------------------------------------------------------------------------------|
| Identification code             | epon                                                                                               |
| Empirical formula               | C <sub>18</sub> H <sub>19</sub> N O <sub>7</sub> S                                                 |
| Formula weight                  | 393.40                                                                                             |
| Temperature                     | 110.15 K                                                                                           |
| Wavelength                      | 1.54178 Å                                                                                          |
| Crystal system                  | Monoclinic                                                                                         |
| Space group                     | P 1 21 1                                                                                           |
| Unit cell dimensions            | a = 12.8722(5) Å     α = 90°<br>b = 6.6204(2) Å     β = 92.069(2)°<br>c = 20.7083(8) Å     γ = 90° |
| Volume                          | 1763.59(11) Å <sup>3</sup>                                                                         |
| Z                               | 4                                                                                                  |
| Density (calculated)            | 1.482 Mg/m <sup>3</sup>                                                                            |
| Absorption coefficient          | 2.019 mm <sup>-1</sup>                                                                             |
| F(000)                          | 824                                                                                                |
| Crystal size                    | 0.54 x 0.02 x 0.02 mm <sup>3</sup>                                                                 |
| Theta range for data collection | 2.135 to 61.119°                                                                                   |
| Index ranges                    | -14 ≤ h ≤ 14, -7 ≤ k ≤ 6, -23 ≤ l ≤ 23                                                             |
| Reflections collected           | 31880                                                                                              |
| Independent reflections         | 5106 [R(int) = 0.0431]                                                                             |
| Completeness to theta = 67.679° | 83.0%                                                                                              |
| Absorption correction           | Semi-empirical from equivalents                                                                    |
| Max. and min. transmission      | 0.7519 and 0.5733                                                                                  |
| Refinement method               | Full-matrix least-squares on F <sup>2</sup>                                                        |
| Data / restraints / parameters  | 5106 / 166 / 515                                                                                   |

|                                      |                                    |
|--------------------------------------|------------------------------------|
| Goodness-of-fit on $F^2$             | 1.116                              |
| Final R indices [ $I > 2\sigma(I)$ ] | $R_1 = 0.0370$ , $wR_2 = 0.0966$   |
| R indices (all data)                 | $R_1 = 0.0428$ , $wR_2 = 0.1092$   |
| Absolute structure parameter         | 0.02(2)                            |
| Extinction coefficient               | 0.0099(8)                          |
| Largest diff. peak and hole          | 0.742 and -0.456 e.Å <sup>-3</sup> |

**Table 2.** Atomic coordinates ( $\times 10^4$ ) and equivalent isotropic displacement parameters ( $\text{Å}^2 \times 10^3$ ) for DRB\_MA\_150407\_G\_EpoN.  $U(\text{eq})$  is defined as one third of the trace of the orthogonalized  $U_{ij}$  tensor.

| Atom | x        | y        | z       | $U(\text{eq})$ |
|------|----------|----------|---------|----------------|
| S(1) | 9919(1)  | -663(2)  | 6245(1) | 17(1)          |
| O(1) | 8844(3)  | 2066(5)  | 5252(2) | 27(1)          |
| O(2) | 6770(2)  | -2054(5) | 5451(2) | 23(1)          |
| O(3) | 6245(2)  | -5170(5) | 4845(2) | 24(1)          |
| O(4) | 5750(3)  | 680(6)   | 3656(2) | 37(1)          |
| O(6) | 10712(2) | 522(5)   | 5974(2) | 23(1)          |
| O(7) | 10157(2) | -2589(5) | 6528(2) | 24(1)          |
| N(1) | 9024(3)  | -1169(6) | 5674(2) | 18(1)          |
| C(1) | 8648(3)  | 266(8)   | 5232(2) | 19(1)          |
| C(2) | 7955(3)  | -843(7)  | 4741(2) | 17(1)          |
| C(3) | 7664(3)  | -2765(7) | 5114(2) | 18(1)          |
| C(4) | 8564(3)  | -3222(7) | 5582(2) | 19(1)          |
| C(5) | 6885(3)  | 125(7)   | 4581(2) | 22(1)          |
| C(6) | 6159(3)  | -1452(7) | 4890(2) | 22(1)          |
| C(7) | 6177(3)  | -3332(8) | 4472(2) | 23(1)          |
| C(8) | 7187(3)  | -4270(7) | 4633(2) | 19(1)          |

|        |          |           |          |       |
|--------|----------|-----------|----------|-------|
| C(9)   | 6624(4)  | 503(8)    | 3871(3)  | 28(1) |
| O(5A)  | 7471(9)  | 1390(30)  | 3636(7)  | 34(1) |
| C(10A) | 7267(18) | 1920(40)  | 2962(9)  | 40(2) |
| C(11A) | 7270(30) | -110(60)  | 2637(13) | 60(2) |
| O(5)   | 7476(3)  | 508(11)   | 3503(2)  | 34(1) |
| C(10)  | 7346(7)  | 737(16)   | 2806(4)  | 40(2) |
| C(11)  | 7232(8)  | -1480(20) | 2582(4)  | 60(2) |
| C(12)  | 9299(3)  | 823(7)    | 6820(2)  | 17(1) |
| C(13)  | 9574(3)  | 2847(7)   | 6887(2)  | 22(1) |
| C(14)  | 9155(4)  | 3937(7)   | 7384(2)  | 22(1) |
| C(15)  | 8471(4)  | 3071(8)   | 7812(2)  | 24(1) |
| C(16)  | 8189(3)  | 1077(8)   | 7717(2)  | 22(1) |
| C(17)  | 8604(3)  | -81(7)    | 7226(2)  | 19(1) |
| C(18)  | 8050(4)  | 4274(10)  | 8356(2)  | 37(1) |
| S(1M)  | 4581(1)  | 9471(2)   | 8775(1)  | 22(1) |
| O(1M)  | 5708(3)  | 12675(5)  | 9647(2)  | 26(1) |
| O(2M)  | 7897(2)  | 9359(5)   | 9212(1)  | 22(1) |
| O(3M)  | 8924(2)  | 6465(5)   | 9692(2)  | 28(1) |
| O(4M)  | 8133(3)  | 10524(6)  | 11252(2) | 39(1) |
| O(6M)  | 3872(2)  | 10870(6)  | 9034(2)  | 30(1) |
| O(7M)  | 4286(3)  | 7413(5)   | 8670(2)  | 31(1) |
| N(1M)  | 5611(3)  | 9356(6)   | 9278(2)  | 19(1) |
| C(1M)  | 6011(3)  | 10941(8)  | 9658(2)  | 19(1) |
| C(2M)  | 6895(3)  | 10075(7)  | 10078(2) | 19(1) |
| C(3M)  | 7243(3)  | 8302(7)   | 9652(2)  | 16(1) |
| C(4M)  | 6275(3)  | 7525(7)   | 9310(2)  | 21(1) |
| C(5M)  | 7885(4)  | 11407(7)  | 10125(2) | 21(1) |
| C(6M)  | 8619(3)  | 10173(7)  | 9690(2)  | 22(1) |
| C(7M)  | 8957(3)  | 8301(8)   | 10070(2) | 25(1) |

|        |          |           |           |       |
|--------|----------|-----------|-----------|-------|
| C(8M)  | 8019(3)  | 7005(7)   | 10045(2)  | 19(1) |
| C(9M)  | 8319(3)  | 11647(8)  | 10813(2)  | 24(1) |
| O(5M)  | 8960(30) | 13180(40) | 10853(11) | 36(1) |
| C(10M) | 9379(15) | 13580(20) | 11503(10) | 42(2) |
| C(11M) | 8725(10) | 15020(20) | 11827(5)  | 55(2) |
| O(5N)  | 8940(50) | 13210(70) | 10864(19) | 36(1) |
| C(10N) | 9470(30) | 13780(40) | 11471(19) | 42(2) |
| C(11N) | 9097(19) | 15730(40) | 11677(10) | 55(2) |
| C(12M) | 5077(3)  | 10437(7)  | 8060(2)   | 20(1) |
| C(13M) | 5293(4)  | 12493(8)  | 8005(2)   | 24(1) |
| C(14M) | 5719(4)  | 13197(8)  | 7449(2)   | 25(1) |
| C(15M) | 5926(3)  | 11908(8)  | 6931(2)   | 24(1) |
| C(16M) | 5681(3)  | 9894(8)   | 6989(2)   | 25(1) |
| C(17M) | 5258(3)  | 9117(8)   | 7550(2)   | 24(1) |
| C(18M) | 6436(4)  | 12727(9)  | 6343(2)   | 30(1) |

---

## Details of computational study of the Diels-Alder step in the DAL process:<sup>13</sup>

*Furanyl diene:*

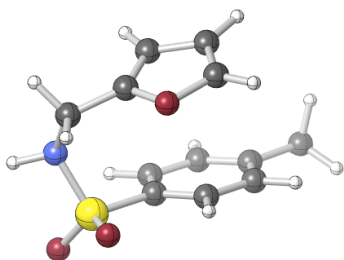

Charge = 0 Multiplicity = 1

Imaginary Frequencies: none found

Zero-point correction = 0.238202 (Hartree/Particle)

Temperature 298.150 Kelvin. Pressure 1.00000 Atm.

Sum of electronic and thermal Free Energies =

-1143.114432 hartrees (-717315.73722432 kcal/mol)

Coordinates (from last standard orientation):

---

<sup>13</sup> Gaussian 09, Revision D.01, Frisch, M. J.; Trucks, G. W.; Schlegel, H. B.; Scuseria, G. E.; Robb, M. A.; Cheeseman, J. R.; Scalmani, G.; Barone, V.; Mennucci, B.; Petersson, G. A.; Nakatsuji, H.; Caricato, M.; Li, X.; Hratchian, H. P.; Izmaylov, A. F.; Bloino, J.; Zheng, G.; Sonnenberg, J. L.; Hada, M.; Ehara, M.; Toyota, K.; Fukuda, R.; Hasegawa, J.; Ishida, M.; Nakajima, T.; Honda, Y.; Kitao, O.; Nakai, H.; Vreven, T.; Montgomery, Jr., J. A.; Peralta, J. E.; Ogliaro, F.; Bearpark, M.; Heyd, J. J.; Brothers, E.; Kudin, K. N.; Staroverov, V. N.; Kobayashi, R.; Normand, J.; Raghavachari, K.; Rendell, A.; Burant, J. C.; Iyengar, S. S.; Tomasi, J.; Cossi, M.; Rega, N.; Millam, N. J.; Klene, M.; Knox, J. E.; Cross, J. B.; Bakken, V.; Adamo, C.; Jaramillo, J.; Gomperts, R.; Stratmann, R. E.; Yazyev, O.; Austin, A. J.; Cammi, R.; Pomelli, C.; Ochterski, J. W.; Martin, R. L.; Morokuma, K.; Zakrzewski, V. G.; Voth, G. A.; Salvador, P.; Dannenberg, J. J.; Dapprich, S.; Daniels, A. D.; Farkas, Ö.; Foresman, J. B.; Ortiz, J. V.; Cioslowski, J.; Fox, D. J. *Gaussian, Inc.*, Wallingford CT, 2009.

| Center<br>Number | Atomic<br>Number | Coordinates (Angstroms) |           |           |
|------------------|------------------|-------------------------|-----------|-----------|
|                  |                  | X                       | Y         | Z         |
| 1                | 6                | -1.080265               | 1.839306  | -0.460650 |
| 2                | 6                | -0.039966               | 2.117052  | -1.292418 |
| 3                | 8                | -0.800458               | 2.281092  | 0.794211  |
| 4                | 6                | 0.949705                | 2.773809  | -0.492999 |
| 5                | 1                | 0.016543                | 1.869600  | -2.343636 |
| 6                | 6                | 0.431102                | 2.843784  | 0.760743  |
| 7                | 1                | 1.915309                | 3.140308  | -0.811573 |
| 8                | 1                | 0.792151                | 3.248117  | 1.694894  |
| 9                | 6                | -2.386291               | 1.138640  | -0.649274 |
| 10               | 1                | -2.993400               | 1.269023  | 0.253099  |
| 11               | 1                | -2.926268               | 1.568957  | -1.496076 |
| 12               | 7                | -2.196223               | -0.284415 | -0.984912 |
| 13               | 1                | -3.037243               | -0.711451 | -1.377227 |
| 14               | 16               | -1.644508               | -1.278350 | 0.239738  |
| 15               | 8                | -2.003469               | -2.628774 | -0.186149 |
| 16               | 8                | -2.084078               | -0.794195 | 1.546196  |
| 17               | 6                | 0.114591                | -1.085704 | 0.155768  |
| 18               | 6                | 0.789589                | -1.550310 | -0.971624 |
| 19               | 6                | 0.787399                | -0.490334 | 1.216211  |
| 20               | 6                | 2.168255                | -1.400344 | -1.032233 |
| 21               | 1                | 0.244082                | -2.018569 | -1.785911 |
| 22               | 6                | 2.170380                | -0.351209 | 1.136849  |
| 23               | 1                | 0.233683                | -0.141693 | 2.081911  |
| 24               | 6                | 2.875941                | -0.796652 | 0.016256  |
| 25               | 1                | 2.708912                | -1.756819 | -1.904927 |

|    |   |          |           |           |
|----|---|----------|-----------|-----------|
| 26 | 1 | 2.708252 | 0.115222  | 1.958078  |
| 27 | 6 | 4.365285 | -0.601277 | -0.076119 |
| 28 | 1 | 4.839654 | -0.705201 | 0.903752  |
| 29 | 1 | 4.817864 | -1.322160 | -0.761950 |
| 30 | 1 | 4.595841 | 0.403634  | -0.448986 |

*Acryloyl chloride:*

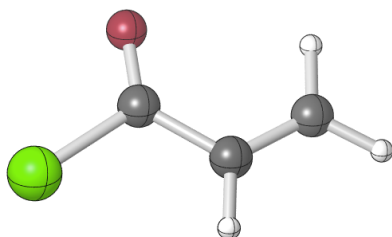

Charge = 0 Multiplicity = 1

Imaginary Frequencies: none found

Zero-point correction = 0.053652 (Hartree/Particle)

Temperature 298.150 Kelvin. Pressure 1.00000 Atm.

Sum of electronic and thermal Free Energies =

-651.387753 hartrees (-408752.32888503 kcal/mol)

Coordinates (from last standard orientation):

-----

| Center | Atomic | Coordinates (Angstroms) |   |   |
|--------|--------|-------------------------|---|---|
| Number | Number | X                       | Y | Z |

---

|   |    |           |           |           |
|---|----|-----------|-----------|-----------|
| 1 | 6  | 0.016545  | 0.339781  | -0.000595 |
| 2 | 6  | 1.058260  | -0.704019 | -0.001395 |
| 3 | 6  | 2.337300  | -0.327358 | 0.001104  |
| 4 | 1  | 0.742849  | -1.740559 | -0.003668 |
| 5 | 1  | 2.613696  | 0.723459  | 0.003162  |
| 6 | 8  | 0.157793  | 1.519571  | -0.000556 |
| 7 | 1  | 3.136290  | -1.062238 | 0.001180  |
| 8 | 17 | -1.660459 | -0.348685 | 0.000535  |

*(S)-(-)-BTM catalyst:*

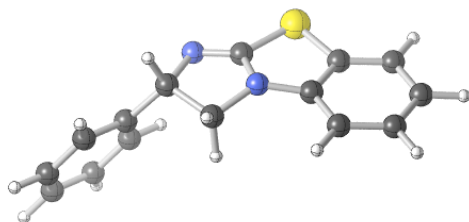

Charge = 0 Multiplicity = 1

Imaginary Frequencies: none found

Zero-point correction = 0.238948 (Hartree/Particle)

Temperature 298.150 Kelvin. Pressure 1.00000 Atm.

Sum of electronic and thermal Free Energies =

-1086.024409 hartrees (-681491.17689159 kcal/mol)

Coordinates (from last standard orientation):

---

| Center | Atomic | Coordinates (Angstroms) |   |   |
|--------|--------|-------------------------|---|---|
| Number | Number | X                       | Y | Z |



---

|    |    |           |           |           |
|----|----|-----------|-----------|-----------|
| 1  | 6  | -2.658926 | -1.872440 | 0.032577  |
| 2  | 6  | -2.123816 | -0.600345 | -0.141211 |
| 3  | 6  | -2.895105 | 0.543447  | 0.132450  |
| 4  | 6  | -4.207606 | 0.432725  | 0.561787  |
| 5  | 6  | -4.746737 | -0.845244 | 0.732328  |
| 6  | 6  | -3.978352 | -1.979555 | 0.473061  |
| 7  | 1  | -2.058599 | -2.752062 | -0.178240 |
| 8  | 1  | -4.800047 | 1.317910  | 0.772337  |
| 9  | 1  | -5.771715 | -0.949580 | 1.072628  |
| 10 | 1  | -4.410212 | -2.965542 | 0.613459  |
| 11 | 6  | -0.539268 | 1.070167  | -0.533267 |
| 12 | 16 | -1.966889 | 2.036351  | -0.147291 |
| 13 | 7  | -0.860156 | -0.271737 | -0.595974 |
| 14 | 6  | 0.395774  | -1.012047 | -0.630557 |
| 15 | 6  | 1.379397  | 0.139158  | -1.027978 |
| 16 | 7  | 0.675758  | 1.406318  | -0.721608 |
| 17 | 6  | 2.713946  | 0.013122  | -0.330895 |
| 18 | 6  | 3.702254  | -0.807909 | -0.878940 |
| 19 | 6  | 2.957188  | 0.651293  | 0.886801  |
| 20 | 6  | 4.914045  | -0.995064 | -0.218440 |
| 21 | 1  | 3.520707  | -1.300931 | -1.831631 |
| 22 | 6  | 4.171891  | 0.470832  | 1.545054  |
| 23 | 1  | 2.193991  | 1.298559  | 1.309570  |
| 24 | 6  | 5.151970  | -0.354415 | 0.996466  |
| 25 | 1  | 5.674328  | -1.635977 | -0.655503 |
| 26 | 1  | 4.353595  | 0.977589  | 2.488602  |
| 27 | 1  | 6.098468  | -0.494531 | 1.510257  |
| 28 | 1  | 0.621577  | -1.422838 | 0.361589  |

|    |   |          |           |           |
|----|---|----------|-----------|-----------|
| 29 | 1 | 0.374413 | -1.817883 | -1.366373 |
| 30 | 1 | 1.544570 | 0.099252  | -2.112384 |

*(S)-(-)-BTMH<sup>+</sup> catalyst:*

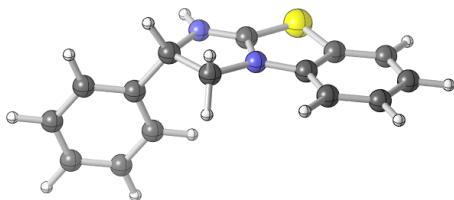

Charge = 1 Multiplicity = 1

Imaginary Frequencies: none found

Zero-point correction = 0.252177 (Hartree/Particle)

Temperature 298.150 Kelvin. Pressure 1.00000 Atm.

Sum of electronic and thermal Free Energies =

-1086.464936 hartrees (-681767.61198936 kcal/mol)

Coordinates (from last standard orientation):

-----

| Center | Atomic | Coordinates (Angstroms) |   |   |
|--------|--------|-------------------------|---|---|
| Number | Number | X                       | Y | Z |

---

|    |    |           |           |           |
|----|----|-----------|-----------|-----------|
| 1  | 6  | -2.663500 | -1.797137 | -0.396424 |
| 2  | 6  | -2.090771 | -0.539640 | -0.247818 |
| 3  | 6  | -2.811742 | 0.529393  | 0.298406  |
| 4  | 6  | -4.127093 | 0.371526  | 0.711509  |
| 5  | 6  | -4.703673 | -0.888323 | 0.565448  |
| 6  | 6  | -3.981804 | -1.954046 | 0.019502  |
| 7  | 1  | -2.095513 | -2.616651 | -0.824150 |
| 8  | 1  | -4.687680 | 1.198952  | 1.133952  |
| 9  | 1  | -5.730768 | -1.039168 | 0.880075  |
| 10 | 1  | -4.456073 | -2.924127 | -0.085294 |
| 11 | 6  | -0.516153 | 1.131255  | -0.341776 |
| 12 | 16 | -1.829364 | 2.009836  | 0.361225  |
| 13 | 7  | -0.800848 | -0.145068 | -0.590833 |
| 14 | 6  | 0.349696  | -0.845956 | -1.171867 |
| 15 | 1  | 0.631074  | -1.688015 | -0.536040 |
| 16 | 1  | 0.099113  | -1.200776 | -2.172759 |
| 17 | 6  | 1.448700  | 0.268075  | -1.200094 |
| 18 | 7  | 0.715701  | 1.448732  | -0.674863 |
| 19 | 6  | 2.670304  | -0.036010 | -0.364351 |
| 20 | 6  | 3.931711  | -0.055251 | -0.955602 |
| 21 | 6  | 2.541015  | -0.297076 | 1.003213  |
| 22 | 6  | 5.060598  | -0.339353 | -0.187717 |
| 23 | 1  | 4.031461  | 0.148751  | -2.018696 |
| 24 | 6  | 3.666879  | -0.576404 | 1.769515  |
| 25 | 1  | 1.555907  | -0.281245 | 1.466950  |
| 26 | 6  | 4.928873  | -0.598196 | 1.173484  |
| 27 | 1  | 6.040740  | -0.356114 | -0.654352 |
| 28 | 1  | 3.562114  | -0.777816 | 2.831264  |

|    |   |          |           |           |
|----|---|----------|-----------|-----------|
| 29 | 1 | 5.807348 | -0.819166 | 1.772115  |
| 30 | 1 | 1.746049 | 0.477425  | -2.229628 |
| 31 | 1 | 1.143848 | 2.357782  | -0.535728 |

*Chiral acylammonium dienophile derived from (S)-(-)-BTM and acryloyl chloride:*

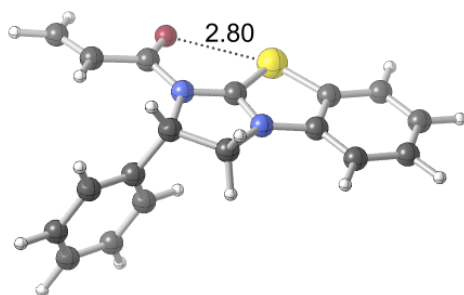

Charge = 1 Multiplicity = 1

Imaginary Frequencies: none found

Zero-point correction = 0.296520 (Hartree/Particle)

Temperature 298.150 Kelvin. Pressure 1.00000 Atm.

Sum of electronic and thermal Free Energies =

-1277.087048 hartrees (-801384.89349048 kcal/mol)

Coordinates (from last standard orientation):

-----  
Center    Atomic                    Coordinates (Angstroms)

| Number | Number | X         | Y         | Z         |
|--------|--------|-----------|-----------|-----------|
| 1      | 6      | -3.277877 | -1.839434 | -0.605224 |
| 2      | 6      | -2.532234 | -0.703183 | -0.307264 |
| 3      | 6      | -3.093937 | 0.403640  | 0.340799  |
| 4      | 6      | -4.434871 | 0.403077  | 0.711405  |
| 5      | 6      | -5.186047 | -0.728948 | 0.414705  |
| 6      | 6      | -4.615429 | -1.833282 | -0.232622 |
| 7      | 6      | -0.737039 | 0.704946  | -0.197898 |
| 8      | 6      | -0.160667 | -1.257724 | -1.279016 |
| 9      | 6      | 1.109220  | -0.360029 | -1.133432 |
| 10     | 6      | 2.191799  | -0.989674 | -0.287568 |
| 11     | 6      | 3.372181  | -1.421614 | -0.890785 |
| 12     | 6      | 1.998945  | -1.182860 | 1.082453  |
| 13     | 6      | 4.355580  | -2.050198 | -0.129149 |
| 14     | 6      | 2.983701  | -1.805575 | 1.842236  |
| 15     | 6      | 4.162264  | -2.241787 | 1.236443  |
| 16     | 6      | 1.228558  | 2.078511  | -0.180499 |
| 17     | 6      | 2.627862  | 2.199734  | -0.632610 |
| 18     | 6      | 3.354551  | 3.231925  | -0.204089 |
| 19     | 1      | -2.822526 | -2.685864 | -1.108947 |
| 20     | 1      | -4.879483 | 1.257010  | 1.211455  |
| 21     | 1      | -6.234788 | -0.754253 | 0.690958  |
| 22     | 1      | -5.228836 | -2.700932 | -0.451349 |
| 23     | 1      | -0.037882 | -2.223815 | -0.786963 |
| 24     | 1      | -0.453776 | -1.397819 | -2.320916 |
| 25     | 1      | 3.520770  | -1.263879 | -1.956438 |
| 26     | 1      | 1.080369  | -0.844510 | 1.558479  |
| 27     | 1      | 5.273098  | -2.385316 | -0.602947 |

|    |    |           |           |           |
|----|----|-----------|-----------|-----------|
| 28 | 1  | 2.831718  | -1.951200 | 2.907267  |
| 29 | 1  | 4.929869  | -2.728295 | 1.830496  |
| 30 | 1  | 1.498397  | -0.105116 | -2.120958 |
| 31 | 1  | 3.034977  | 1.455336  | -1.308063 |
| 32 | 1  | 2.935556  | 3.965861  | 0.478745  |
| 33 | 8  | 0.611030  | 2.928705  | 0.431287  |
| 34 | 7  | -1.188017 | -0.473569 | -0.585503 |
| 35 | 7  | 0.561011  | 0.883147  | -0.505225 |
| 36 | 16 | -1.900649 | 1.691214  | 0.587327  |
| 37 | 1  | 4.384376  | 3.361532  | -0.520547 |

*DAL process leading to endo cycloadduct:*

*Reactant:*

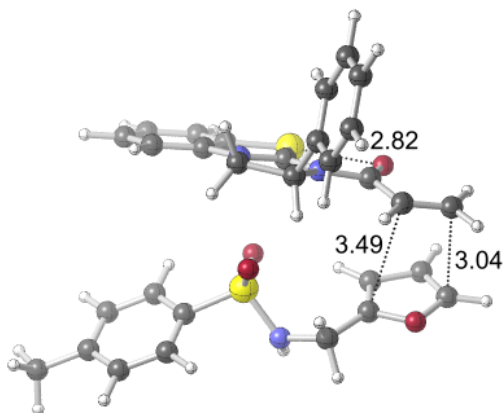

Charge = 1 Multiplicity = 1

Imaginary Frequencies: none found

Zero-point correction = 0.535897 (Hartree/Particle)

Temperature 298.150 Kelvin. Pressure 1.00000 Atm.

Sum of electronic and thermal Free Energies =

-2420.199164 hartrees (-1518699.17740164 kcal/mol)

Coordinates (from last standard orientation):

| -----  |        |                         |           |           |  |
|--------|--------|-------------------------|-----------|-----------|--|
| Center | Atomic | Coordinates (Angstroms) |           |           |  |
| Number | Number | X                       | Y         | Z         |  |
| -----  |        |                         |           |           |  |
| 1      | 6      | -1.876841               | -3.353288 | 0.357633  |  |
| 2      | 6      | -0.893576               | -2.533028 | 0.901822  |  |
| 3      | 6      | -0.876747               | -2.200780 | 2.263162  |  |
| 4      | 6      | -1.857926               | -2.685398 | 3.121777  |  |
| 5      | 6      | -2.846170               | -3.502992 | 2.582747  |  |
| 6      | 6      | -2.854320               | -3.832296 | 1.220999  |  |
| 7      | 6      | 0.921337                | -1.156866 | 1.004052  |  |
| 8      | 6      | 0.648281                | -1.967164 | -1.145343 |  |
| 9      | 6      | 1.811977                | -0.927030 | -1.134361 |  |
| 10     | 6      | 3.125353                | -1.480534 | -1.634981 |  |
| 11     | 6      | 3.636588                | -1.026090 | -2.850252 |  |
| 12     | 6      | 3.814356                | -2.461988 | -0.917316 |  |
| 13     | 6      | 4.826993                | -1.550080 | -3.350626 |  |
| 14     | 6      | 5.006087                | -2.980407 | -1.414699 |  |
| 15     | 6      | 5.512919                | -2.525841 | -2.632539 |  |
| 16     | 6      | 2.730101                | 0.412464  | 0.921719  |  |
| 17     | 6      | 3.504378                | 1.282044  | 0.020494  |  |
| 18     | 6      | 4.418097                | 2.100546  | 0.545645  |  |
| 19     | 6      | 0.825969                | 3.482910  | 0.399144  |  |
| 20     | 6      | 0.790700                | 2.995101  | 1.669653  |  |
| 21     | 6      | 1.926891                | 3.556683  | 2.340970  |  |
| 22     | 6      | 2.557766                | 4.335311  | 1.426933  |  |

|    |   |           |           |           |
|----|---|-----------|-----------|-----------|
| 23 | 6 | -0.089155 | 3.376188  | -0.782556 |
| 24 | 6 | -3.251574 | 0.921885  | -0.812855 |
| 25 | 6 | -3.692798 | 1.409399  | -2.044230 |
| 26 | 6 | -4.079100 | 0.173938  | 0.016722  |
| 27 | 6 | -4.994344 | 1.141160  | -2.437778 |
| 28 | 6 | -5.383539 | -0.084228 | -0.398522 |
| 29 | 6 | -5.856576 | 0.390712  | -1.623454 |
| 30 | 6 | -7.263881 | 0.112473  | -2.076198 |
| 31 | 1 | -1.873431 | -3.598340 | -0.699534 |
| 32 | 1 | -1.854628 | -2.431846 | 4.176771  |
| 33 | 1 | -3.623122 | -3.891341 | 3.232775  |
| 34 | 1 | -3.637578 | -4.473491 | 0.830556  |
| 35 | 1 | 1.001496  | -2.977463 | -1.365597 |
| 36 | 1 | -0.148010 | -1.677062 | -1.829341 |
| 37 | 1 | 3.102233  | -0.257840 | -3.403961 |
| 38 | 1 | 3.422129  | -2.821061 | 0.031937  |
| 39 | 1 | 5.218487  | -1.190345 | -4.297131 |
| 40 | 1 | 5.539836  | -3.740857 | -0.852983 |
| 41 | 1 | 6.443210  | -2.931285 | -3.018442 |
| 42 | 1 | 1.517959  | -0.051921 | -1.715030 |
| 43 | 1 | 3.296023  | 1.262005  | -1.043991 |
| 44 | 1 | 4.622724  | 2.095115  | 1.612053  |
| 45 | 1 | 0.048722  | 2.321363  | 2.076257  |
| 46 | 1 | 2.231481  | 3.387187  | 3.363748  |
| 47 | 1 | 3.440799  | 4.956629  | 1.457211  |
| 48 | 1 | 4.992523  | 2.777462  | -0.079040 |
| 49 | 1 | -0.259907 | 4.373603  | -1.199713 |
| 50 | 1 | 0.344274  | 2.764042  | -1.578562 |
| 51 | 1 | -1.880287 | 3.296354  | 0.310234  |



|    |    |           |           |           |
|----|----|-----------|-----------|-----------|
| 52 | 1  | -3.029374 | 1.994445  | -2.674401 |
| 53 | 1  | -3.711157 | -0.194822 | 0.968990  |
| 54 | 1  | -5.354743 | 1.517256  | -3.391442 |
| 55 | 1  | -6.041712 | -0.664995 | 0.241506  |
| 56 | 1  | -7.811843 | -0.472755 | -1.334066 |
| 57 | 1  | -7.807574 | 1.047440  | -2.247557 |
| 58 | 1  | -7.264717 | -0.441069 | -3.021049 |
| 59 | 8  | 2.742892  | 0.460211  | 2.136909  |
| 60 | 8  | 1.894844  | 4.304571  | 0.240737  |
| 61 | 8  | -1.418412 | 0.676940  | 1.031729  |
| 62 | 8  | -0.669973 | 0.618931  | -1.356708 |
| 63 | 7  | 0.162542  | -1.919324 | 0.238090  |
| 64 | 7  | 1.877359  | -0.523688 | 0.304693  |
| 65 | 7  | -1.401792 | 2.817298  | -0.454646 |
| 66 | 16 | 0.489639  | -1.148331 | 2.662245  |
| 67 | 16 | -1.566692 | 1.172178  | -0.338185 |

*Transition state 1 (TS1):*

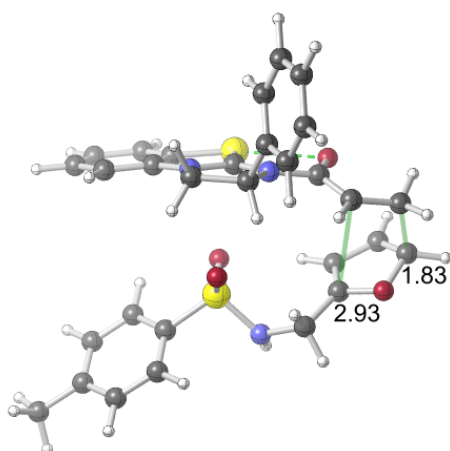

Charge = 1 Multiplicity = 1

Imaginary Frequencies: 1 (-345.8703 1/cm)

Zero-point correction = 0.536311 (Hartree/Particle)

Temperature 298.150 Kelvin. Pressure 1.00000 Atm.

Sum of electronic and thermal Free Energies =

-2420.171089 hartrees (-1518681.56005839 kcal/mol)

Coordinates (from last standard orientation):

| -----  |        |                         |           |           |
|--------|--------|-------------------------|-----------|-----------|
| Center | Atomic | Coordinates (Angstroms) |           |           |
| Number | Number | X                       | Y         | Z         |
| -----  |        |                         |           |           |
| 1      | 6      | 1.794895                | -3.483645 | -0.057538 |
| 2      | 6      | 0.839441                | -2.679478 | -0.669545 |
| 3      | 6      | 0.840523                | -2.455041 | -2.053353 |
| 4      | 6      | 1.807577                | -3.039014 | -2.862458 |
| 5      | 6      | 2.768830                | -3.843972 | -2.255862 |
| 6      | 6      | 2.761303                | -4.061855 | -0.873699 |
| 7      | 6      | -0.926212               | -1.242501 | -0.889991 |
| 8      | 6      | -0.680711               | -1.882208 | 1.317614  |
| 9      | 6      | -1.814446               | -0.813510 | 1.201099  |
| 10     | 6      | -3.158928               | -1.294376 | 1.698618  |
| 11     | 6      | -3.751199               | -0.688218 | 2.805332  |
| 12     | 6      | -3.803907               | -2.362263 | 1.068442  |
| 13     | 6      | -4.977456               | -1.147842 | 3.284464  |
| 14     | 6      | -5.029462               | -2.817477 | 1.542733  |
| 15     | 6      | -5.617271               | -2.211354 | 2.653600  |
| 16     | 6      | -2.607526               | 0.483699  | -0.945253 |
| 17     | 6      | -3.177374               | 1.508515  | -0.165088 |
| 18     | 6      | -3.922558               | 2.503365  | -0.848401 |

|    |   |           |           |           |
|----|---|-----------|-----------|-----------|
| 19 | 6 | -0.918025 | 3.329013  | -0.552523 |
| 20 | 6 | -0.824393 | 2.792339  | -1.833863 |
| 21 | 6 | -1.994487 | 3.150164  | -2.481011 |
| 22 | 6 | -2.819359 | 3.801051  | -1.520498 |
| 23 | 6 | 0.058278  | 3.367553  | 0.584350  |
| 24 | 6 | 3.275132  | 1.004117  | 0.724795  |
| 25 | 6 | 3.748542  | 1.646883  | 1.869730  |
| 26 | 6 | 4.087926  | 0.172703  | -0.037723 |
| 27 | 6 | 5.070245  | 1.454759  | 2.240848  |
| 28 | 6 | 5.412279  | -0.006316 | 0.354083  |
| 29 | 6 | 5.919427  | 0.627076  | 1.490598  |
| 30 | 6 | 7.348072  | 0.429754  | 1.918300  |
| 31 | 1 | 1.780722  | -3.644012 | 1.015522  |
| 32 | 1 | 1.816189  | -2.869703 | -3.934463 |
| 33 | 1 | 3.534806  | -4.308336 | -2.868088 |
| 34 | 1 | 3.522418  | -4.693273 | -0.426988 |
| 35 | 1 | -1.064621 | -2.853155 | 1.639047  |
| 36 | 1 | 0.124047  | -1.552652 | 1.973553  |
| 37 | 1 | -3.251367 | 0.144644  | 3.294329  |
| 38 | 1 | -3.346742 | -2.838078 | 0.202904  |
| 39 | 1 | -5.432808 | -0.671630 | 4.147451  |
| 40 | 1 | -5.526806 | -3.645275 | 1.046638  |
| 41 | 1 | -6.573498 | -2.568286 | 3.023868  |
| 42 | 1 | -1.515239 | 0.095564  | 1.725572  |
| 43 | 1 | -3.012800 | 1.562097  | 0.903830  |
| 44 | 1 | -4.418637 | 2.188479  | -1.764534 |
| 45 | 1 | -0.015333 | 2.175565  | -2.201085 |
| 46 | 1 | -2.298773 | 2.887395  | -3.484317 |
| 47 | 1 | -3.510364 | 4.605516  | -1.747171 |

|    |    |           |           |           |
|----|----|-----------|-----------|-----------|
| 48 | 1  | -4.548005 | 3.139211  | -0.224892 |
| 49 | 1  | 0.202205  | 4.412197  | 0.880024  |
| 50 | 1  | -0.339264 | 2.836877  | 1.453349  |
| 51 | 1  | 1.840139  | 3.257089  | -0.528843 |
| 52 | 1  | 3.095516  | 2.292756  | 2.449429  |
| 53 | 1  | 3.694094  | -0.317213 | -0.922776 |
| 54 | 1  | 5.457132  | 1.953352  | 3.125609  |
| 55 | 1  | 6.060558  | -0.647460 | -0.236273 |
| 56 | 1  | 7.908742  | -0.144208 | 1.176795  |
| 57 | 1  | 7.847899  | 1.392782  | 2.062476  |
| 58 | 1  | 7.394201  | -0.106448 | 2.872468  |
| 59 | 8  | -2.640830 | 0.392161  | -2.178219 |
| 60 | 8  | -2.009189 | 4.073600  | -0.415980 |
| 61 | 8  | 1.399223  | 0.568283  | -1.043363 |
| 62 | 8  | 0.710737  | 0.688871  | 1.361216  |
| 63 | 7  | -0.197557 | -1.982134 | -0.062314 |
| 64 | 7  | -1.842994 | -0.520203 | -0.258277 |
| 65 | 7  | 1.367670  | 2.815755  | 0.261587  |
| 66 | 16 | -0.488658 | -1.387855 | -2.546685 |
| 67 | 16 | 1.573114  | 1.168319  | 0.279408  |

*Intermediate (INT):*

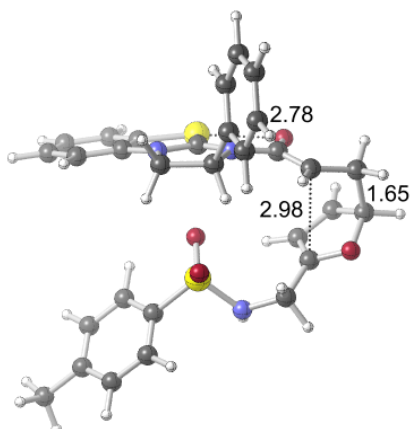

Charge = 1 Multiplicity = 1

Imaginary Frequencies: none found

Zero-point correction = 0.537064 (Hartree/Particle)

Temperature 298.150 Kelvin. Pressure 1.00000 Atm.

Sum of electronic and thermal Free Energies =

-2420.171447 hartrees (-1518681.78470697 kcal/mol)

Coordinates (from last standard orientation):

| -----  |        |                         |          |           |  |
|--------|--------|-------------------------|----------|-----------|--|
| Center | Atomic | Coordinates (Angstroms) |          |           |  |
| Number | Number | X                       | Y        | Z         |  |
| -----  |        |                         |          |           |  |
| 1      | 6      | -1.669753               | 3.752528 | 0.275274  |  |
| 2      | 6      | -0.748258               | 2.992142 | -0.436645 |  |
| 3      | 6      | -0.728959               | 2.982060 | -1.837812 |  |
| 4      | 6      | -1.631143               | 3.750634 | -2.563229 |  |
| 5      | 6      | -2.555034               | 4.516612 | -1.856244 |  |
| 6      | 6      | -2.574831               | 4.513588 | -0.457486 |  |
| 7      | 6      | 0.960045                | 1.521263 | -0.843346 |  |
| 8      | 6      | 0.560666                | 1.693397 | 1.421898  |  |

|    |   |           |           |           |
|----|---|-----------|-----------|-----------|
| 9  | 6 | 1.674941  | 0.631338  | 1.155656  |
| 10 | 6 | 2.972095  | 0.924385  | 1.873334  |
| 11 | 6 | 3.342357  | 0.142502  | 2.967092  |
| 12 | 6 | 3.778728  | 1.996021  | 1.483775  |
| 13 | 6 | 4.508751  | 0.431907  | 3.673387  |
| 14 | 6 | 4.945842  | 2.281202  | 2.185546  |
| 15 | 6 | 5.311207  | 1.500918  | 3.283087  |
| 16 | 6 | 2.541099  | -0.275012 | -1.141561 |
| 17 | 6 | 3.139881  | -1.363943 | -0.522744 |
| 18 | 6 | 3.840067  | -2.295907 | -1.397826 |
| 19 | 6 | 0.908479  | -3.257676 | -1.069518 |
| 20 | 6 | 0.687788  | -2.492241 | -2.225740 |
| 21 | 6 | 1.839011  | -2.589315 | -2.964220 |
| 22 | 6 | 2.810121  | -3.331430 | -2.171677 |
| 23 | 6 | 0.003371  | -3.603374 | 0.073130  |
| 24 | 6 | -3.161368 | -1.228400 | 0.776297  |
| 25 | 6 | -3.814917 | -2.043408 | 1.702299  |
| 26 | 6 | -3.836997 | -0.259111 | 0.044031  |
| 27 | 6 | -5.178989 | -1.878261 | 1.882990  |
| 28 | 6 | -5.207436 | -0.110378 | 0.242976  |
| 29 | 6 | -5.893202 | -0.911636 | 1.158160  |
| 30 | 1 | -1.674457 | 3.745393  | 1.360512  |
| 31 | 1 | -1.619146 | 3.750969  | -3.648705 |
| 32 | 1 | -3.270380 | 5.122240  | -2.402681 |
| 33 | 1 | -3.307625 | 5.115966  | 0.069373  |
| 34 | 1 | 0.919567  | 2.522201  | 2.035708  |
| 35 | 1 | -0.325725 | 1.243950  | 1.875725  |
| 36 | 1 | 2.715007  | -0.695391 | 3.262650  |
| 37 | 1 | 3.497074  | 2.604302  | 0.626791  |

|    |    |           |           |           |
|----|----|-----------|-----------|-----------|
| 38 | 1  | 4.790725  | -0.180020 | 4.524789  |
| 39 | 1  | 5.571369  | 3.113390  | 1.877081  |
| 40 | 1  | 6.221657  | 1.726009  | 3.830283  |
| 41 | 1  | 1.306734  | -0.358978 | 1.436514  |
| 42 | 1  | 4.365688  | -1.808933 | -2.222186 |
| 43 | 1  | -0.198610 | -1.911241 | -2.438417 |
| 44 | 1  | 2.049509  | -2.134425 | -3.921591 |
| 45 | 1  | 4.515895  | -2.964674 | -0.863002 |
| 46 | 1  | -0.146047 | -4.689151 | 0.064544  |
| 47 | 1  | 0.486960  | -3.358051 | 1.023884  |
| 48 | 1  | -1.820024 | -3.111995 | -0.843389 |
| 49 | 1  | -3.263328 | -2.792905 | 2.262483  |
| 50 | 1  | -3.303071 | 0.363785  | -0.666510 |
| 51 | 1  | -5.704874 | -2.506183 | 2.597271  |
| 52 | 1  | -5.749613 | 0.642339  | -0.322166 |
| 53 | 8  | 2.510140  | -0.047947 | -2.369490 |
| 54 | 8  | 2.049657  | -3.906974 | -1.113889 |
| 55 | 8  | -0.972230 | -0.424214 | -0.428510 |
| 56 | 8  | -0.734109 | -1.390491 | 1.864893  |
| 57 | 7  | 0.244320  | 2.164752  | 0.073345  |
| 58 | 7  | 1.821676  | 0.663811  | -0.320500 |
| 59 | 7  | -1.305810 | -2.969689 | 0.027687  |
| 60 | 16 | 0.532022  | 1.900523  | -2.468854 |
| 61 | 16 | -1.416897 | -1.399280 | 0.571129  |
| 62 | 6  | -7.372254 | -0.749862 | 1.378808  |
| 63 | 1  | -7.575627 | -0.426418 | 2.405313  |
| 64 | 1  | -7.798440 | -0.011955 | 0.695357  |
| 65 | 1  | -7.892625 | -1.701546 | 1.230171  |
| 66 | 1  | 3.095205  | -1.522954 | 0.546427  |

67 1 3.415379 -4.093981 -2.658516

*Transition state 2 (TS2):*

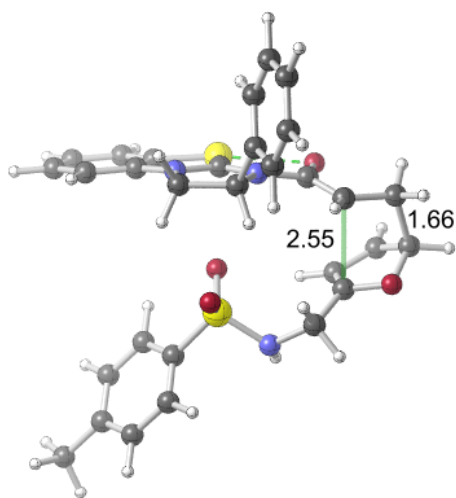

Charge = 1 Multiplicity = 1

Imaginary Frequencies: 1 (-140.0196 1/cm)

Zero-point correction = 0.536243 (Hartree/Particle)

Temperature 298.150 Kelvin. Pressure 1.00000 Atm.

Sum of electronic and thermal Free Energies =

-2420.172570 hartrees (-1518682.4894007 kcal/mol)



Coordinates (from last standard orientation):

---

| Center<br>Number | Atomic<br>Number | Coordinates (Angstroms) |           |           |
|------------------|------------------|-------------------------|-----------|-----------|
|                  |                  | X                       | Y         | Z         |
| 1                | 6                | -1.426448               | 3.952549  | 0.468582  |
| 2                | 6                | -0.603051               | 3.133591  | -0.297365 |
| 3                | 6                | -0.639107               | 3.155876  | -1.697749 |
| 4                | 6                | -1.501431               | 4.013116  | -2.370464 |
| 5                | 6                | -2.328931               | 4.835146  | -1.609893 |
| 6                | 6                | -2.292044               | 4.802170  | -0.211212 |
| 7                | 6                | 0.954709                | 1.537082  | -0.805749 |
| 8                | 6                | 0.662775                | 1.682904  | 1.478179  |
| 9                | 6                | 1.701510                | 0.563290  | 1.148105  |
| 10               | 6                | 3.055255                | 0.784133  | 1.782299  |
| 11               | 6                | 3.449390                | -0.020248 | 2.850686  |
| 12               | 6                | 3.893022                | 1.811884  | 1.343263  |
| 13               | 6                | 4.672157                | 0.201542  | 3.481990  |
| 14               | 6                | 5.115865                | 2.029795  | 1.970315  |
| 15               | 6                | 5.506382                | 1.225726  | 3.041651  |
| 16               | 6                | 2.379346                | -0.358125 | -1.206503 |
| 17               | 6                | 2.897889                | -1.540547 | -0.637500 |
| 18               | 6                | 3.664855                | -2.398686 | -1.531543 |
| 19               | 6                | 0.951219                | -3.161300 | -0.937493 |
| 20               | 6                | 0.618665                | -2.552097 | -2.176290 |
| 21               | 6                | 1.653081                | -2.833817 | -3.016681 |
| 22               | 6                | 2.665124                | -3.531069 | -2.226095 |
| 23               | 6                | 0.125233                | -3.372386 | 0.299846  |

|    |   |           |           |           |
|----|---|-----------|-----------|-----------|
| 24 | 6 | -3.239739 | -1.202075 | 0.737733  |
| 25 | 6 | -3.898294 | -2.057508 | 1.623023  |
| 26 | 6 | -3.924133 | -0.255826 | -0.016481 |
| 27 | 6 | -5.276109 | -1.958854 | 1.737268  |
| 28 | 6 | -5.307762 | -0.173329 | 0.116746  |
| 29 | 6 | -5.998780 | -1.016887 | 0.989242  |
| 30 | 1 | -1.386365 | 3.921512  | 1.552554  |
| 31 | 1 | -1.531637 | 4.038367  | -3.455030 |
| 32 | 1 | -3.012596 | 5.511120  | -2.112718 |
| 33 | 1 | -2.948683 | 5.452477  | 0.357386  |
| 34 | 1 | 1.089402  | 2.470440  | 2.102313  |
| 35 | 1 | -0.236300 | 1.271559  | 1.941716  |
| 36 | 1 | 2.794522  | -0.820348 | 3.188455  |
| 37 | 1 | 3.591084  | 2.439389  | 0.507147  |
| 38 | 1 | 4.972540  | -0.427970 | 4.314007  |
| 39 | 1 | 5.765987  | 2.827216  | 1.623233  |
| 40 | 1 | 6.461045  | 1.397175  | 3.529726  |
| 41 | 1 | 1.298751  | -0.405439 | 1.454621  |
| 42 | 1 | 4.121878  | -1.866455 | -2.366297 |
| 43 | 1 | -0.236063 | -1.911611 | -2.349030 |
| 44 | 1 | 1.798715  | -2.479620 | -4.028075 |
| 45 | 1 | 4.406640  | -3.005398 | -1.011054 |
| 46 | 1 | 0.065185  | -4.453023 | 0.469902  |
| 47 | 1 | 0.608232  | -2.939740 | 1.180448  |
| 48 | 1 | -1.733686 | -3.113582 | -0.644731 |
| 49 | 1 | -3.340001 | -2.787247 | 2.202194  |
| 50 | 1 | -3.384995 | 0.401056  | -0.691848 |
| 51 | 1 | -5.805925 | -2.619909 | 2.418029  |
| 52 | 1 | -5.857174 | 0.560436  | -0.466047 |

|    |    |           |           |           |
|----|----|-----------|-----------|-----------|
| 53 | 8  | 2.351165  | -0.085441 | -2.412744 |
| 54 | 8  | 1.968054  | -4.001254 | -1.085805 |
| 55 | 8  | -1.044688 | -0.331816 | -0.413392 |
| 56 | 8  | -0.865705 | -1.119393 | 1.949077  |
| 57 | 7  | 0.335309  | 2.212518  | 0.152958  |
| 58 | 7  | 1.763224  | 0.594814  | -0.334939 |
| 59 | 7  | -1.236359 | -2.857574 | 0.210249  |
| 60 | 16 | 0.505081  | 1.995938  | -2.401698 |
| 61 | 16 | -1.480187 | -1.267304 | 0.628975  |
| 62 | 6  | -7.492110 | -0.922488 | 1.141972  |
| 63 | 1  | -7.755255 | -0.608275 | 2.157775  |
| 64 | 1  | -7.919133 | -0.203208 | 0.439373  |
| 65 | 1  | -7.963111 | -1.895931 | 0.972155  |
| 66 | 1  | 2.934128  | -1.679421 | 0.435610  |
| 67 | 1  | 3.267452  | -4.318155 | -2.672503 |

*Product:*

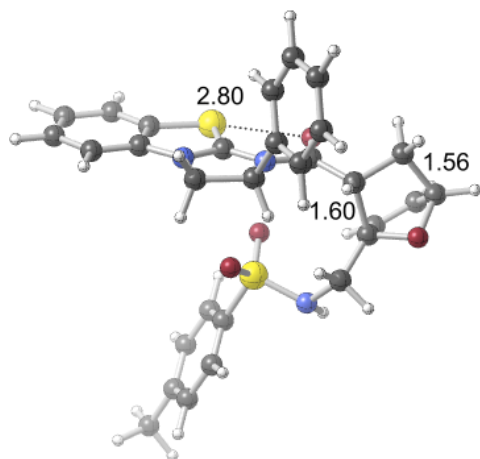

Charge = 1 Multiplicity = 1

Imaginary Frequencies: none found

Zero-point correction = 0.540950 (Hartree/Particle)

Temperature 298.150 Kelvin. Pressure 1.00000 Atm.

Sum of electronic and thermal Free Energies =

-2420.200296 hartrees (-1518699.88774296 kcal/mol)

Coordinates (from last standard orientation):

```
-----
```

| Center | Atomic | Coordinates (Angstroms) |           |           |
|--------|--------|-------------------------|-----------|-----------|
| Number | Number | X                       | Y         | Z         |
| 1      | 6      | 0.451652                | 4.581019  | -0.784546 |
| 2      | 6      | 0.085359                | 3.514159  | 0.030243  |
| 3      | 6      | 0.365836                | 3.501961  | 1.402801  |
| 4      | 6      | 1.026917                | 4.569584  | 2.001696  |
| 5      | 6      | 1.393568                | 5.639487  | 1.192830  |
| 6      | 6      | 1.109695                | 5.644173  | -0.179526 |
| 7      | 6      | -0.792299               | 1.500063  | 0.649133  |
| 8      | 6      | -1.101849               | 1.850757  | -1.616431 |
| 9      | 6      | -1.807442               | 0.522349  | -1.198672 |
| 10     | 6      | -3.307716               | 0.546036  | -1.383708 |
| 11     | 6      | -3.878279               | -0.188102 | -2.423518 |
| 12     | 6      | -4.122912               | 1.316264  | -0.549935 |
| 13     | 6      | -5.255101               | -0.147182 | -2.635809 |
| 14     | 6      | -5.497916               | 1.352080  | -0.759843 |
| 15     | 6      | -6.065337               | 0.621711  | -1.803989 |
| 16     | 6      | -1.657286               | -0.679194 | 1.127716  |
| 17     | 6      | -2.116463               | -1.974516 | 0.526325  |
| 18     | 6      | -3.125402               | -2.733690 | 1.420108  |
| 19     | 6      | -0.960834               | -3.073662 | 0.370822  |
| 20     | 6      | -0.326608               | -3.259933 | 1.742839  |

```
-----
```

|    |   |           |           |           |
|----|---|-----------|-----------|-----------|
| 21 | 6 | -1.232270 | -3.922530 | 2.462526  |
| 22 | 6 | -2.421471 | -4.119547 | 1.545569  |
| 23 | 6 | -0.070388 | -3.001744 | -0.874851 |
| 24 | 6 | 3.415307  | -0.985529 | -0.548971 |
| 25 | 6 | 3.974567  | -1.283046 | -1.792854 |
| 26 | 6 | 4.200097  | -0.633695 | 0.542873  |
| 27 | 6 | 5.353180  | -1.229698 | -1.929606 |
| 28 | 6 | 5.582541  | -0.586467 | 0.382778  |
| 29 | 6 | 6.175164  | -0.884059 | -0.846040 |
| 30 | 1 | 0.228664  | 4.572974  | -1.846333 |
| 31 | 1 | 1.248435  | 4.565213  | 3.064045  |
| 32 | 1 | 1.907984  | 6.485367  | 1.636404  |
| 33 | 1 | 1.408493  | 6.494300  | -0.783628 |
| 34 | 1 | -1.805172 | 2.574802  | -2.031109 |
| 35 | 1 | -0.274103 | 1.676087  | -2.304169 |
| 36 | 1 | -3.242840 | -0.794097 | -3.065208 |
| 37 | 1 | -3.685015 | 1.885940  | 0.267249  |
| 38 | 1 | -5.694153 | -0.721080 | -3.446161 |
| 39 | 1 | -6.127284 | 1.950161  | -0.108075 |
| 40 | 1 | -7.138522 | 0.650107  | -1.965919 |
| 41 | 1 | -1.362957 | -0.306026 | -1.750144 |
| 42 | 1 | -3.277503 | -2.254630 | 2.388460  |
| 43 | 1 | 0.602052  | -2.806055 | 2.067680  |
| 44 | 1 | -1.212345 | -4.157273 | 3.520057  |
| 45 | 1 | -4.085247 | -2.833479 | 0.909641  |
| 46 | 1 | -0.039566 | -4.009913 | -1.296050 |
| 47 | 1 | -0.494356 | -2.342402 | -1.636895 |
| 48 | 1 | 1.829206  | -3.220753 | -0.017992 |
| 49 | 1 | 3.341389  | -1.552075 | -2.633082 |

|    |    |           |           |           |
|----|----|-----------|-----------|-----------|
| 50 | 1  | 3.736381  | -0.402753 | 1.496346  |
| 51 | 1  | 5.806492  | -1.457961 | -2.890555 |
| 52 | 1  | 6.207961  | -0.313209 | 1.227675  |
| 53 | 8  | -1.429561 | -0.504254 | 2.305595  |
| 54 | 8  | -1.794115 | -4.224624 | 0.265626  |
| 55 | 8  | 1.333873  | -0.628337 | 1.011478  |
| 56 | 8  | 1.008660  | -0.259557 | -1.436672 |
| 57 | 7  | -0.578527 | 2.348387  | -0.339973 |
| 58 | 7  | -1.432014 | 0.389752  | 0.241550  |
| 59 | 7  | 1.328257  | -2.613956 | -0.670563 |
| 60 | 16 | -0.221541 | 2.021967  | 2.177353  |
| 61 | 16 | 1.659346  | -1.016481 | -0.363678 |
| 62 | 1  | -2.531258 | -1.816822 | -0.470199 |
| 63 | 1  | -3.080371 | -4.966606 | 1.729043  |
| 64 | 6  | 7.669482  | -0.852138 | -1.015094 |
| 65 | 1  | 8.060712  | -1.865111 | -1.160126 |
| 66 | 1  | 7.951035  | -0.266152 | -1.895467 |
| 67 | 1  | 8.159391  | -0.420891 | -0.138798 |

*Lactam:*

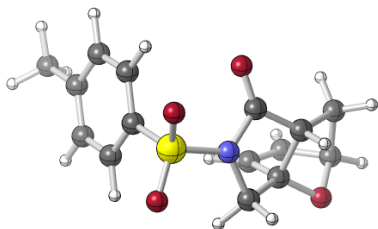

Charge = 0 Multiplicity = 1

Imaginary Frequencies: none found

Zero-point correction = 0.285169 (Hartree/Particle)

Temperature 298.150 Kelvin. Pressure 1.00000 Atm.

Sum of electronic and thermal Free Energies =  
-1333.723404 hartrees (-836924.77324404 kcal/mol)

Coordinates (from last standard orientation):

| -----  |        |                         |           |           |
|--------|--------|-------------------------|-----------|-----------|
| Center | Atomic | Coordinates (Angstroms) |           |           |
| Number | Number | X                       | Y         | Z         |
| -----  |        |                         |           |           |
| 1      | 6      | -1.217397               | 0.627771  | 1.155317  |
| 2      | 6      | -2.590653               | 0.121585  | 0.807775  |
| 3      | 6      | -3.384162               | -1.081645 | 1.316300  |
| 4      | 6      | -2.366851               | -0.240358 | -0.685431 |
| 5      | 6      | -1.544986               | -1.521227 | -0.762466 |
| 6      | 6      | -2.386650               | -2.493466 | -0.416892 |
| 7      | 6      | -3.679404               | -1.777297 | -0.076266 |
| 8      | 6      | -1.683656               | 1.006211  | -1.217195 |
| 9      | 6      | 1.847187                | 0.621933  | -0.110256 |
| 10     | 6      | 2.185674                | -0.049128 | -1.286049 |
| 11     | 6      | 2.349917                | 0.231998  | 1.127306  |
| 12     | 6      | 3.042684                | -1.138650 | -1.207410 |
| 13     | 6      | 3.210073                | -0.860743 | 1.180903  |
| 14     | 6      | 3.560802                | -1.562438 | 0.023850  |
| 15     | 1      | -2.830447               | -1.747171 | 1.980896  |
| 16     | 1      | -0.482941               | -1.565500 | -0.981092 |
| 17     | 1      | -2.193477               | -3.548512 | -0.264252 |
| 18     | 1      | -4.303306               | -0.765471 | 1.811842  |
| 19     | 1      | -1.083539               | 0.849196  | -2.114568 |
| 20     | 1      | -2.378274               | 1.837341  | -1.367753 |
| 21     | 1      | 1.798983                | 0.289436  | -2.242416 |

|    |    |           |           |           |
|----|----|-----------|-----------|-----------|
| 22 | 1  | 2.070983  | 0.773895  | 2.024287  |
| 23 | 1  | 3.321047  | -1.668288 | -2.114783 |
| 24 | 1  | 3.614385  | -1.174663 | 2.139102  |
| 25 | 8  | -0.554171 | 0.551875  | 2.160134  |
| 26 | 8  | -3.669809 | -0.679036 | -1.022033 |
| 27 | 8  | 0.925330  | 2.854328  | 0.935580  |
| 28 | 8  | 0.725405  | 2.511226  | -1.558813 |
| 29 | 7  | -0.801746 | 1.268284  | -0.041138 |
| 30 | 16 | 0.715866  | 1.979431  | -0.203287 |
| 31 | 1  | -3.238046 | 1.007958  | 0.800997  |
| 32 | 1  | -4.615089 | -2.328231 | -0.144900 |
| 33 | 6  | 4.478379  | -2.753769 | 0.085596  |
| 34 | 1  | 3.931399  | -3.673838 | -0.148599 |
| 35 | 1  | 5.286848  | -2.661604 | -0.646307 |
| 36 | 1  | 4.920075  | -2.865251 | 1.078674  |

*DAL process leading to endo cycloadduct (opposite enantiomer):*

*Reactant:*



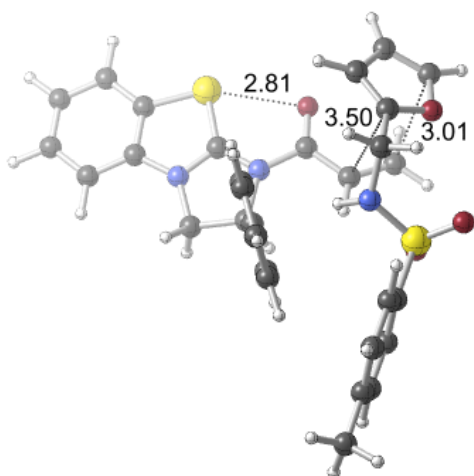

Charge = 1 Multiplicity = 1

Imaginary Frequencies: none found

Zero-point correction = 0.536310 (Hartree/Particle)

Temperature 298.150 Kelvin. Pressure 1.00000 Atm.

Sum of electronic and thermal Free Energies =

-2420.192652 hartrees (-1518695.09105652 kcal/mol)

Coordinates (from last standard orientation):

| -----  |        |                         |           |           |  |
|--------|--------|-------------------------|-----------|-----------|--|
| Center | Atomic | Coordinates (Angstroms) |           |           |  |
| Number | Number | X                       | Y         | Z         |  |
| -----  |        |                         |           |           |  |
| 1      | 6      | -5.552436               | -2.889935 | -0.002115 |  |
| 2      | 6      | -4.975051               | -1.631138 | -0.133811 |  |
| 3      | 6      | -5.702710               | -0.455522 | 0.088946  |  |
| 4      | 6      | -7.044321               | -0.509357 | 0.452777  |  |
| 5      | 6      | -7.626307               | -1.765006 | 0.588167  |  |
| 6      | 6      | -6.891713               | -2.936791 | 0.362052  |  |

|    |   |           |           |           |
|----|---|-----------|-----------|-----------|
| 7  | 6 | -3.384893 | -0.041358 | -0.535822 |
| 8  | 6 | -2.515827 | -2.151619 | -0.894389 |
| 9  | 6 | -1.365826 | -1.096661 | -0.979374 |
| 10 | 6 | -0.334878 | -1.282595 | 0.113561  |
| 11 | 6 | 0.817149  | -2.020734 | -0.173234 |
| 12 | 6 | -0.557275 | -0.824530 | 1.415475  |
| 13 | 6 | 1.725537  | -2.323911 | 0.839403  |
| 14 | 6 | 0.357136  | -1.124524 | 2.424385  |
| 15 | 6 | 1.494034  | -1.880478 | 2.139770  |
| 16 | 6 | -1.639497 | 1.504398  | -1.119066 |
| 17 | 6 | -0.241316 | 1.623704  | -1.555886 |
| 18 | 6 | 0.168402  | 2.770827  | -2.103155 |
| 19 | 6 | 1.213655  | 3.052005  | 1.291387  |
| 20 | 6 | -0.069086 | 3.320299  | 1.662389  |
| 21 | 6 | -0.483620 | 4.452151  | 0.887939  |
| 22 | 6 | 0.578487  | 4.775433  | 0.106209  |
| 23 | 6 | 2.204232  | 2.033215  | 1.738789  |
| 24 | 6 | 4.296169  | -0.553541 | -0.370770 |
| 25 | 6 | 4.242234  | -1.398362 | -1.470846 |
| 26 | 6 | 4.966228  | -0.918628 | 0.797224  |
| 27 | 6 | 4.874666  | -2.639059 | -1.397477 |
| 28 | 6 | 5.590726  | -2.155401 | 0.852031  |
| 29 | 6 | 5.557648  | -3.031259 | -0.244397 |
| 30 | 6 | 6.259537  | -4.360326 | -0.168311 |
| 31 | 1 | -4.972695 | -3.789335 | -0.182106 |
| 32 | 1 | -7.615070 | 0.396815  | 0.627647  |
| 33 | 1 | -8.670598 | -1.834986 | 0.873495  |
| 34 | 1 | -7.376233 | -3.900851 | 0.474538  |
| 35 | 1 | -2.315722 | -2.919451 | -0.146149 |

|    |   |           |           |           |
|----|---|-----------|-----------|-----------|
| 36 | 1 | -2.734210 | -2.611063 | -1.860456 |
| 37 | 1 | 0.998403  | -2.362200 | -1.189817 |
| 38 | 1 | -1.442829 | -0.238478 | 1.649017  |
| 39 | 1 | 2.623010  | -2.890122 | 0.605128  |
| 40 | 1 | 0.178955  | -0.766535 | 3.433996  |
| 41 | 1 | 2.207436  | -2.107454 | 2.926243  |
| 42 | 1 | -0.892444 | -1.140971 | -1.961944 |
| 43 | 1 | 0.428102  | 0.774947  | -1.459425 |
| 44 | 1 | -0.519665 | 3.600296  | -2.235757 |
| 45 | 1 | -0.638501 | 2.785607  | 2.410717  |
| 46 | 1 | -1.442625 | 4.949452  | 0.906851  |
| 47 | 1 | 0.754541  | 5.547923  | -0.628072 |
| 48 | 1 | 1.194177  | 2.884460  | -2.438127 |
| 49 | 1 | 1.855315  | 1.595587  | 2.678003  |
| 50 | 1 | 3.176863  | 2.496844  | 1.919886  |
| 51 | 1 | 1.569321  | 0.417528  | 0.538998  |
| 52 | 1 | 3.709283  | -1.091016 | -2.364855 |
| 53 | 1 | 4.986887  | -0.247445 | 1.651627  |
| 54 | 1 | 4.840471  | -3.308629 | -2.252450 |
| 55 | 1 | 6.117684  | -2.451795 | 1.755346  |
| 56 | 1 | 5.978102  | -4.901717 | 0.740382  |
| 57 | 1 | 6.021322  | -4.985541 | -1.032272 |
| 58 | 1 | 7.345611  | -4.219241 | -0.139930 |
| 59 | 8 | -2.430154 | 2.418493  | -0.985321 |
| 60 | 8 | 1.618065  | 3.936176  | 0.345286  |
| 61 | 8 | 4.452614  | 2.069644  | -0.065425 |
| 62 | 8 | 2.815099  | 1.109269  | -1.728610 |
| 63 | 7 | -3.660922 | -1.331612 | -0.482649 |
| 64 | 7 | -2.101105 | 0.194891  | -0.862114 |

|    |    |           |          |           |
|----|----|-----------|----------|-----------|
| 65 | 7  | 2.415749  | 0.920700 | 0.807114  |
| 66 | 16 | -4.706961 | 0.988749 | -0.172648 |
| 67 | 16 | 3.497434  | 1.030819 | -0.435821 |

*Transition state 1(TS1):*

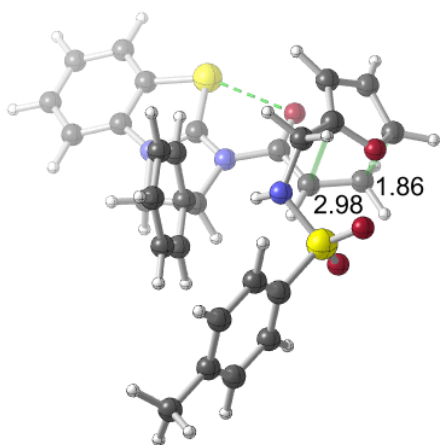

Charge = 1 Multiplicity = 1

Imaginary Frequencies: 1 (-381.5746 1/cm)

Zero-point correction = 0.536963 (Hartree/Particle)

Temperature 298.150 Kelvin. Pressure 1.00000 Atm.

Sum of electronic and thermal Free Energies =

-2420.166207 hartrees (-1518678.49655457 kcal/mol)

Coordinates (from last standard orientation):

```
-----
```

| Center | Atomic | Coordinates (Angstroms) |           |           |
|--------|--------|-------------------------|-----------|-----------|
| Number | Number | X                       | Y         | Z         |
| 1      | 6      | -5.469924               | -2.924467 | -0.246197 |
| 2      | 6      | -4.902738               | -1.655080 | -0.218744 |
| 3      | 6      | -5.650506               | -0.518953 | 0.116138  |
| 4      | 6      | -6.999105               | -0.628069 | 0.435736  |
| 5      | 6      | -7.572290               | -1.895942 | 0.413705  |
| 6      | 6      | -6.818158               | -3.026393 | 0.076812  |
| 7      | 6      | -3.317839               | -0.009989 | -0.402928 |
| 8      | 6      | -2.435547               | -2.049511 | -1.023796 |
| 9      | 6      | -1.302845               | -0.972587 | -0.974698 |
| 10     | 6      | -0.266684               | -1.299940 | 0.078286  |
| 11     | 6      | 0.878743                | -2.006520 | -0.301123 |
| 12     | 6      | -0.486119               | -1.009391 | 1.427922  |
| 13     | 6      | 1.787816                | -2.437828 | 0.663485  |
| 14     | 6      | 0.426002                | -1.441729 | 2.389579  |
| 15     | 6      | 1.558948                | -2.161455 | 2.010110  |
| 16     | 6      | -1.618357               | 1.638638  | -0.876645 |
| 17     | 6      | -0.295903               | 1.862050  | -1.312722 |
| 18     | 6      | 0.000546                | 3.170046  | -1.765552 |

```
-----
```

|    |   |           |           |           |
|----|---|-----------|-----------|-----------|
| 19 | 6 | 0.985460  | 2.875279  | 1.178512  |
| 20 | 6 | -0.294480 | 3.328712  | 1.481434  |
| 21 | 6 | -0.589355 | 4.301366  | 0.538168  |
| 22 | 6 | 0.487911  | 4.313063  | -0.385863 |
| 23 | 6 | 1.879781  | 1.869603  | 1.829459  |
| 24 | 6 | 4.325097  | -0.425571 | -0.300250 |
| 25 | 6 | 4.350794  | -1.122553 | -1.501175 |
| 26 | 6 | 4.930314  | -0.930703 | 0.850663  |
| 27 | 6 | 4.993320  | -2.358984 | -1.545054 |
| 28 | 6 | 5.564729  | -2.162019 | 0.788069  |
| 29 | 6 | 5.605663  | -2.893677 | -0.409226 |
| 30 | 6 | 6.314530  | -4.219911 | -0.459753 |
| 31 | 1 | -4.875499 | -3.792863 | -0.510627 |
| 32 | 1 | -7.586464 | 0.247010  | 0.694597  |
| 33 | 1 | -8.622600 | -2.006555 | 0.661890  |
| 34 | 1 | -7.292560 | -4.002089 | 0.066008  |
| 35 | 1 | -2.211547 | -2.907489 | -0.388417 |
| 36 | 1 | -2.655739 | -2.379968 | -2.041232 |
| 37 | 1 | 1.056617  | -2.219993 | -1.352739 |
| 38 | 1 | -1.368041 | -0.448345 | 1.729118  |
| 39 | 1 | 2.682078  | -2.975317 | 0.359116  |
| 40 | 1 | 0.249756  | -1.215745 | 3.437084  |
| 41 | 1 | 2.269866  | -2.493794 | 2.760611  |
| 42 | 1 | -0.830958 | -0.876012 | -1.954915 |
| 43 | 1 | 0.436089  | 1.066087  | -1.373251 |
| 44 | 1 | -0.834882 | 3.749089  | -2.154980 |
| 45 | 1 | -0.921485 | 2.954599  | 2.278878  |
| 46 | 1 | -1.507931 | 4.859883  | 0.429521  |
| 47 | 1 | 0.836262  | 5.180541  | -0.934748 |

|    |    |           |           |           |
|----|----|-----------|-----------|-----------|
| 48 | 1  | 0.915037  | 3.268071  | -2.346908 |
| 49 | 1  | 1.349403  | 1.393723  | 2.657086  |
| 50 | 1  | 2.760039  | 2.379754  | 2.233233  |
| 51 | 1  | 1.570150  | 0.269715  | 0.529204  |
| 52 | 1  | 3.872667  | -0.707340 | -2.382589 |
| 53 | 1  | 4.890866  | -0.371950 | 1.781581  |
| 54 | 1  | 5.018368  | -2.915731 | -2.477764 |
| 55 | 1  | 6.035520  | -2.569888 | 1.678706  |
| 56 | 1  | 6.057109  | -4.835957 | 0.407135  |
| 57 | 1  | 6.061948  | -4.772788 | -1.367945 |
| 58 | 1  | 7.400426  | -4.073703 | -0.444616 |
| 59 | 8  | -2.474895 | 2.503620  | -0.661079 |
| 60 | 8  | 1.515690  | 3.567046  | 0.179931  |
| 61 | 8  | 4.377122  | 2.140706  | 0.386493  |
| 62 | 8  | 2.906938  | 1.398732  | -1.523749 |
| 63 | 7  | -3.584506 | -1.306507 | -0.498765 |
| 64 | 7  | -2.046926 | 0.278885  | -0.681876 |
| 65 | 7  | 2.336481  | 0.809676  | 0.936571  |
| 66 | 16 | -4.667188 | 0.958562  | 0.046155  |
| 67 | 16 | 3.497968  | 1.141246  | -0.211369 |

*Intermediate (INT):*

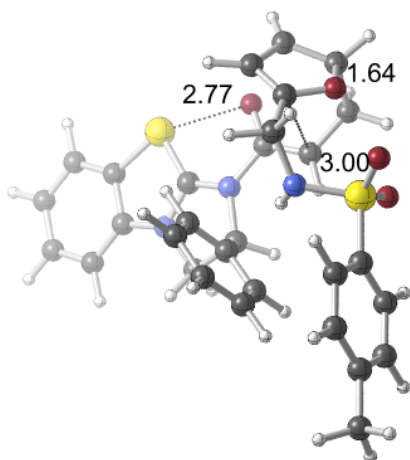

Charge = 1 Multiplicity = 1

Imaginary Frequencies: none found

Zero-point correction = 0.538023 (Hartree/Particle)

Temperature 298.150 Kelvin. Pressure 1.00000 Atm.

Sum of electronic and thermal Free Energies =

-2420.167204 hartrees (-1518679.12218204 kcal/mol)

Coordinates (from last standard orientation):

| -----  |        |                         |           |           |
|--------|--------|-------------------------|-----------|-----------|
| Center | Atomic | Coordinates (Angstroms) |           |           |
| Number | Number | X                       | Y         | Z         |
| -----  |        |                         |           |           |
| 1      | 6      | -5.469824               | -2.920873 | -0.219987 |
| 2      | 6      | -4.894150               | -1.655490 | -0.210650 |
| 3      | 6      | -5.628848               | -0.513446 | 0.134082  |
| 4      | 6      | -6.970497               | -0.614325 | 0.482431  |
| 5      | 6      | -7.552758               | -1.879031 | 0.478076  |
| 6      | 6      | -6.812277               | -3.014544 | 0.131229  |
| 7      | 6      | -3.302198               | -0.018504 | -0.436540 |



|    |   |           |           |           |
|----|---|-----------|-----------|-----------|
| 8  | 6 | -2.448806 | -2.062891 | -1.076702 |
| 9  | 6 | -1.309246 | -0.992833 | -1.040399 |
| 10 | 6 | -0.266560 | -1.322706 | 0.006055  |
| 11 | 6 | 0.893110  | -1.999731 | -0.382639 |
| 12 | 6 | -0.496519 | -1.066617 | 1.361344  |
| 13 | 6 | 1.805208  | -2.437239 | 0.576821  |
| 14 | 6 | 0.417391  | -1.506088 | 2.317717  |
| 15 | 6 | 1.564605  | -2.197355 | 1.928096  |
| 16 | 6 | -1.593122 | 1.624463  | -0.931179 |
| 17 | 6 | -0.294615 | 1.842203  | -1.361039 |
| 18 | 6 | 0.032095  | 3.222930  | -1.721659 |
| 19 | 6 | 0.916024  | 2.829982  | 1.204526  |
| 20 | 6 | -0.385016 | 3.259935  | 1.514924  |
| 21 | 6 | -0.725041 | 4.160458  | 0.539424  |
| 22 | 6 | 0.362824  | 4.184037  | -0.434621 |
| 23 | 6 | 1.809712  | 1.822377  | 1.855993  |
| 24 | 6 | 4.350774  | -0.372788 | -0.255357 |
| 25 | 6 | 4.418930  | -1.034271 | -1.474286 |
| 26 | 6 | 4.930374  | -0.902980 | 0.897879  |
| 27 | 6 | 5.079921  | -2.260334 | -1.535443 |
| 28 | 6 | 5.582512  | -2.123776 | 0.817873  |
| 29 | 6 | 5.667104  | -2.819737 | -0.398582 |
| 30 | 1 | -4.886032 | -3.794363 | -0.491298 |
| 31 | 1 | -7.547579 | 0.265293  | 0.749356  |
| 32 | 1 | -8.598344 | -1.981873 | 0.748699  |
| 33 | 1 | -7.291496 | -3.988012 | 0.135067  |
| 34 | 1 | -2.214835 | -2.930577 | -0.458357 |
| 35 | 1 | -2.693538 | -2.379022 | -2.093296 |
| 36 | 1 | 1.078806  | -2.187416 | -1.437800 |

|    |    |           |           |           |
|----|----|-----------|-----------|-----------|
| 37 | 1  | -1.390135 | -0.528613 | 1.671072  |
| 38 | 1  | 2.709418  | -2.953641 | 0.265468  |
| 39 | 1  | 0.231403  | -1.308424 | 3.369322  |
| 40 | 1  | 2.276690  | -2.536241 | 2.674621  |
| 41 | 1  | -0.843481 | -0.899312 | -2.023955 |
| 42 | 1  | -0.793753 | 3.743896  | -2.212972 |
| 43 | 1  | -0.981522 | 2.898952  | 2.341280  |
| 44 | 1  | -1.651726 | 4.705253  | 0.432270  |
| 45 | 1  | 0.703592  | 5.145318  | -0.814814 |
| 46 | 1  | 0.938729  | 3.291215  | -2.324339 |
| 47 | 1  | 1.270471  | 1.318725  | 2.660677  |
| 48 | 1  | 2.672591  | 2.341154  | 2.286757  |
| 49 | 1  | 1.540516  | 0.287912  | 0.471356  |
| 50 | 1  | 3.960512  | -0.599885 | -2.356847 |
| 51 | 1  | 4.859083  | -0.371362 | 1.842772  |
| 52 | 1  | 5.140978  | -2.787708 | -2.483414 |
| 53 | 1  | 6.035563  | -2.550218 | 1.709119  |
| 54 | 8  | -2.450581 | 2.499069  | -0.680937 |
| 55 | 8  | 1.433266  | 3.499707  | 0.206327  |
| 56 | 8  | 4.343534  | 2.168081  | 0.521185  |
| 57 | 8  | 2.969864  | 1.475653  | -1.479471 |
| 58 | 7  | -3.579421 | -1.317591 | -0.516790 |
| 59 | 7  | -2.042559 | 0.261466  | -0.743277 |
| 60 | 7  | 2.292688  | 0.805562  | 0.932239  |
| 61 | 16 | -4.637956 | 0.960272  | 0.038977  |
| 62 | 16 | 3.504189  | 1.181714  | -0.151642 |
| 63 | 6  | 6.385044  | -4.140535 | -0.464036 |
| 64 | 1  | 5.994753  | -4.835535 | 0.286329  |
| 65 | 1  | 6.279459  | -4.601623 | -1.449065 |

|    |   |          |           |           |
|----|---|----------|-----------|-----------|
| 66 | 1 | 7.453427 | -4.009000 | -0.261324 |
| 67 | 1 | 0.426183 | 1.045409  | -1.496175 |

*Transition state 2 (TS2):*

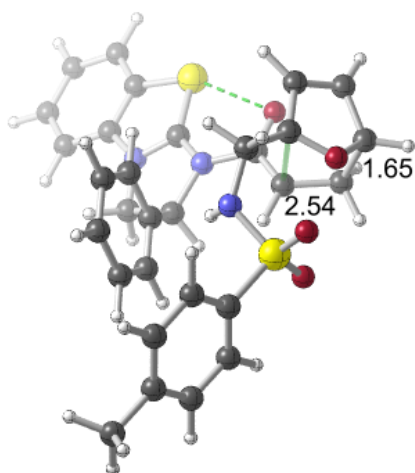

Charge = 1 Multiplicity = 1

Imaginary Frequencies: 1 (-151.6403 1/cm)

Zero-point correction = 0.537385 (Hartree/Particle)

Temperature 298.150 Kelvin. Pressure 1.00000 Atm.

Sum of electronic and thermal Free Energies =

-2420.165694 hartrees (-1518678.17464194 kcal/mol)

Coordinates (from last standard orientation):

| -----  |        |                         |           |           |
|--------|--------|-------------------------|-----------|-----------|
| Center | Atomic | Coordinates (Angstroms) |           |           |
| Number | Number | X                       | Y         | Z         |
| -----  |        |                         |           |           |
| 1      | 6      | -5.524239               | -2.923595 | -0.341118 |
| 2      | 6      | -4.946145               | -1.663241 | -0.232692 |

|    |   |           |           |           |
|----|---|-----------|-----------|-----------|
| 3  | 6 | -5.686941 | -0.541482 | 0.159353  |
| 4  | 6 | -7.041260 | -0.654825 | 0.452276  |
| 5  | 6 | -7.626225 | -1.913356 | 0.347907  |
| 6  | 6 | -6.877778 | -3.030127 | -0.043295 |
| 7  | 6 | -3.341026 | -0.027716 | -0.298924 |
| 8  | 6 | -2.475700 | -2.042930 | -1.021145 |
| 9  | 6 | -1.341698 | -0.965974 | -0.966022 |
| 10 | 6 | -0.238278 | -1.378092 | -0.019464 |
| 11 | 6 | 0.900595  | -1.998196 | -0.541544 |
| 12 | 6 | -0.388536 | -1.257435 | 1.364983  |
| 13 | 6 | 1.875409  | -2.508446 | 0.315720  |
| 14 | 6 | 0.590505  | -1.763585 | 2.218152  |
| 15 | 6 | 1.719011  | -2.394244 | 1.695263  |
| 16 | 6 | -1.643961 | 1.637214  | -0.701635 |
| 17 | 6 | -0.309079 | 1.898270  | -1.079303 |
| 18 | 6 | -0.062448 | 3.220373  | -1.665479 |
| 19 | 6 | 0.809887  | 2.794321  | 1.011815  |
| 20 | 6 | -0.391244 | 3.444124  | 1.410697  |
| 21 | 6 | -0.599950 | 4.426443  | 0.495248  |
| 22 | 6 | 0.448256  | 4.287726  | -0.520810 |
| 23 | 6 | 1.613888  | 1.752466  | 1.727262  |
| 24 | 6 | 4.384812  | -0.338025 | -0.226469 |
| 25 | 6 | 4.557599  | -0.970480 | -1.450697 |
| 26 | 6 | 4.903791  | -0.874619 | 0.952308  |
| 27 | 6 | 5.261649  | -2.173134 | -1.491322 |
| 28 | 6 | 5.598852  | -2.073014 | 0.892949  |
| 29 | 6 | 5.788511  | -2.739068 | -0.328199 |
| 30 | 1 | -4.933874 | -3.781120 | -0.646655 |
| 31 | 1 | -7.624119 | 0.210311  | 0.751496  |

|    |   |           |           |           |
|----|---|-----------|-----------|-----------|
| 32 | 1 | -8.681225 | -2.027468 | 0.573520  |
| 33 | 1 | -7.361120 | -3.998526 | -0.118626 |
| 34 | 1 | -2.247450 | -2.906897 | -0.394986 |
| 35 | 1 | -2.698746 | -2.365127 | -2.040264 |
| 36 | 1 | 1.022143  | -2.082036 | -1.619112 |
| 37 | 1 | -1.268747 | -0.768373 | 1.776252  |
| 38 | 1 | 2.764338  | -2.978330 | -0.096303 |
| 39 | 1 | 0.471264  | -1.663286 | 3.292904  |
| 40 | 1 | 2.482519  | -2.783035 | 2.362208  |
| 41 | 1 | -0.935273 | -0.793094 | -1.965526 |
| 42 | 1 | -0.948724 | 3.671237  | -2.114951 |
| 43 | 1 | -1.029352 | 3.127118  | 2.224298  |
| 44 | 1 | -1.452919 | 5.086381  | 0.410743  |
| 45 | 1 | 0.867435  | 5.170047  | -0.998038 |
| 46 | 1 | 0.762691  | 3.200214  | -2.378482 |
| 47 | 1 | 0.973597  | 1.222649  | 2.436153  |
| 48 | 1 | 2.394609  | 2.269891  | 2.296628  |
| 49 | 1 | 1.574513  | 0.145210  | 0.411071  |
| 50 | 1 | 4.141655  | -0.532627 | -2.352428 |
| 51 | 1 | 4.749364  | -0.367545 | 1.900688  |
| 52 | 1 | 5.402408  | -2.677972 | -2.443004 |
| 53 | 1 | 6.003948  | -2.504681 | 1.804592  |
| 54 | 8 | -2.519952 | 2.483615  | -0.494882 |
| 55 | 8 | 1.455051  | 3.519036  | 0.112483  |
| 56 | 8 | 4.249748  | 2.201345  | 0.551734  |
| 57 | 8 | 2.983190  | 1.456343  | -1.500975 |
| 58 | 7 | -3.622577 | -1.311293 | -0.479908 |
| 59 | 7 | -2.061183 | 0.264742  | -0.538883 |
| 60 | 7 | 2.246291  | 0.750449  | 0.884232  |

|    |    |           |           |           |
|----|----|-----------|-----------|-----------|
| 61 | 16 | -4.690325 | 0.927356  | 0.180461  |
| 62 | 16 | 3.476053  | 1.183272  | -0.151723 |
| 63 | 6  | 6.552673  | -4.034949 | -0.371112 |
| 64 | 1  | 6.177236  | -4.736197 | 0.380688  |
| 65 | 1  | 6.476812  | -4.507611 | -1.353471 |
| 66 | 1  | 7.613329  | -3.864448 | -0.156615 |
| 67 | 1  | 0.384453  | 1.088837  | -1.275789 |

*Product:*

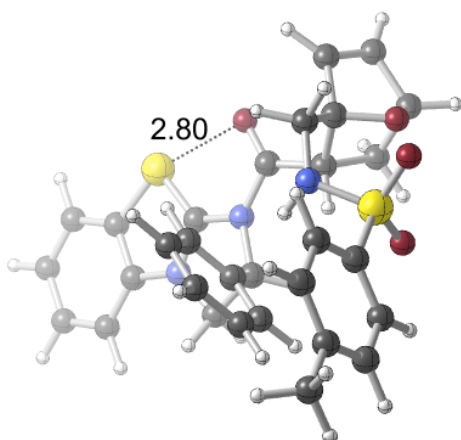

Charge = 1 Multiplicity = 1

Imaginary Frequencies: none found

Zero-point correction = 0.541134 (Hartree/Particle)

Temperature 298.150 Kelvin. Pressure 1.00000 Atm.

Sum of electronic and thermal Free Energies =

-2420.195648 hartrees (-1518696.97107648 kcal/mol)

Coordinates (from last standard orientation):

| -----  |        |                         |           |           |
|--------|--------|-------------------------|-----------|-----------|
| Center | Atomic | Coordinates (Angstroms) |           |           |
| Number | Number | X                       | Y         | Z         |
| -----  |        |                         |           |           |
| 1      | 6      | -5.493805               | -2.754021 | -0.903094 |
| 2      | 6      | -4.901236               | -1.588070 | -0.428795 |
| 3      | 6      | -5.581794               | -0.699985 | 0.413174  |
| 4      | 6      | -6.890638               | -0.957273 | 0.808502  |
| 5      | 6      | -7.488651               | -2.120359 | 0.336729  |
| 6      | 6      | -6.800284               | -3.004363 | -0.505445 |
| 7      | 6      | -3.324159               | 0.036086  | -0.125140 |
| 8      | 6      | -2.529606               | -1.590974 | -1.556768 |

|    |   |           |           |           |
|----|---|-----------|-----------|-----------|
| 9  | 6 | -1.365443 | -0.633032 | -1.160183 |
| 10 | 6 | -0.331566 | -1.293900 | -0.269666 |
| 11 | 6 | 0.772279  | -1.912066 | -0.865866 |
| 12 | 6 | -0.478431 | -1.333875 | 1.120666  |
| 13 | 6 | 1.707268  | -2.581511 | -0.078793 |
| 14 | 6 | 0.466195  | -1.995455 | 1.904695  |
| 15 | 6 | 1.555819  | -2.623921 | 1.306904  |
| 16 | 6 | -1.572063 | 1.671961  | 0.066385  |
| 17 | 6 | -0.251514 | 2.122756  | -0.485061 |
| 18 | 6 | -0.430144 | 3.231113  | -1.569238 |
| 19 | 6 | 0.716008  | 2.849559  | 0.530374  |
| 20 | 6 | -0.048927 | 4.003904  | 1.169357  |
| 21 | 6 | -0.154252 | 4.927693  | 0.214920  |
| 22 | 6 | 0.523298  | 4.329610  | -1.002641 |
| 23 | 6 | 1.535989  | 1.968020  | 1.453703  |
| 24 | 6 | 4.295999  | -0.475335 | -0.132487 |
| 25 | 6 | 4.641635  | -1.175666 | -1.281711 |
| 26 | 6 | 4.702933  | -0.904546 | 1.130782  |
| 27 | 6 | 5.399082  | -2.338936 | -1.159732 |
| 28 | 6 | 5.451503  | -2.068219 | 1.233703  |
| 29 | 6 | 5.809188  | -2.802346 | 0.092459  |
| 30 | 1 | -4.950627 | -3.428864 | -1.556444 |
| 31 | 1 | -7.425423 | -0.272698 | 1.458835  |
| 32 | 1 | -8.509506 | -2.345500 | 0.626405  |
| 33 | 1 | -7.297270 | -3.902494 | -0.856556 |
| 34 | 1 | -2.295441 | -2.633673 | -1.339572 |
| 35 | 1 | -2.829619 | -1.475238 | -2.600315 |
| 36 | 1 | 0.902050  | -1.862009 | -1.944249 |
| 37 | 1 | -1.318934 | -0.845778 | 1.607100  |



|    |    |           |           |           |
|----|----|-----------|-----------|-----------|
| 38 | 1  | 2.565745  | -3.054099 | -0.546359 |
| 39 | 1  | 0.348038  | -2.014092 | 2.983524  |
| 40 | 1  | 2.294423  | -3.133940 | 1.917462  |
| 41 | 1  | -0.900318 | -0.226974 | -2.060281 |
| 42 | 1  | -1.459131 | 3.583498  | -1.666999 |
| 43 | 1  | -0.482266 | 3.991094  | 2.161380  |
| 44 | 1  | -0.702483 | 5.861871  | 0.233327  |
| 45 | 1  | 0.940041  | 5.007895  | -1.745280 |
| 46 | 1  | -0.076847 | 2.871422  | -2.537463 |
| 47 | 1  | 0.892889  | 1.582588  | 2.251504  |
| 48 | 1  | 2.315281  | 2.581630  | 1.913115  |
| 49 | 1  | 1.514473  | 0.084193  | 0.529470  |
| 50 | 1  | 4.309512  | -0.822716 | -2.252651 |
| 51 | 1  | 4.418744  | -0.344915 | 2.017021  |
| 52 | 1  | 5.671661  | -2.896524 | -2.051591 |
| 53 | 1  | 5.767598  | -2.418551 | 2.213026  |
| 54 | 8  | -2.270908 | 2.290660  | 0.841559  |
| 55 | 8  | 1.543985  | 3.530400  | -0.405573 |
| 56 | 8  | 4.166594  | 2.154244  | 0.175593  |
| 57 | 8  | 2.827319  | 1.043973  | -1.656664 |
| 58 | 7  | -3.616916 | -1.120103 | -0.691529 |
| 59 | 7  | -2.080459 | 0.455776  | -0.436390 |
| 60 | 7  | 2.173897  | 0.798357  | 0.842676  |
| 61 | 16 | -4.574587 | 0.691899  | 0.845914  |
| 62 | 16 | 3.367162  | 1.029289  | -0.296635 |
| 63 | 6  | 6.623357  | -4.060693 | 0.228838  |
| 64 | 1  | 6.130181  | -4.774545 | 0.896870  |
| 65 | 1  | 6.774457  | -4.542910 | -0.739996 |
| 66 | 1  | 7.606406  | -3.840862 | 0.658785  |

67 1 0.295330 1.283832 -0.920589

*DAL process leading to exo cycloadduct:*

*Reactant:*

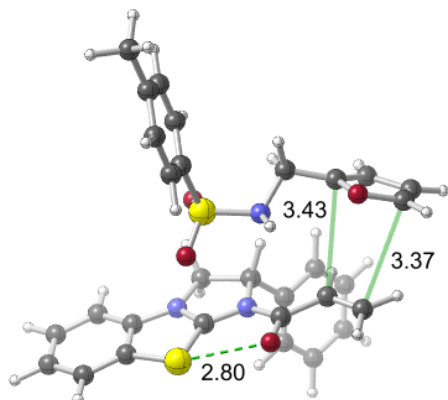

Charge = 1 Multiplicity = 1

Imaginary Frequencies: none found

Zero-point correction = 0.535602 (Hartree/Particle)

Temperature 298.150 Kelvin. Pressure 1.00000 Atm.

Sum of electronic and thermal Free Energies =

-2420.201981 hartrees (-1518700.94509731 kcal/mol)

Coordinates (from last standard orientation):

| -----  |        |                         |          |           |  |
|--------|--------|-------------------------|----------|-----------|--|
| Center | Atomic | Coordinates (Angstroms) |          |           |  |
| Number | Number | X                       | Y        | Z         |  |
| -----  |        |                         |          |           |  |
| 1      | 6      | -1.635449               | 4.329608 | -1.480646 |  |
| 2      | 6      | -1.562353               | 3.427415 | -0.423821 |  |
| 3      | 6      | -1.409738               | 3.852710 | 0.901974  |  |

|    |   |           |           |           |
|----|---|-----------|-----------|-----------|
| 4  | 6 | -1.318826 | 5.207115  | 1.206242  |
| 5  | 6 | -1.389611 | 6.113255  | 0.154167  |
| 6  | 6 | -1.546030 | 5.680113  | -1.169215 |
| 7  | 6 | -1.536079 | 1.433607  | 0.686243  |
| 8  | 6 | -1.829954 | 1.091463  | -1.585308 |
| 9  | 6 | -1.866325 | -0.285461 | -0.848388 |
| 10 | 6 | -3.175974 | -1.019185 | -1.027656 |
| 11 | 6 | -3.214444 | -2.182797 | -1.794839 |
| 12 | 6 | -4.352509 | -0.523350 | -0.459733 |
| 13 | 6 | -4.421649 | -2.849382 | -1.997049 |
| 14 | 6 | -5.556257 | -1.191826 | -0.658507 |
| 15 | 6 | -5.592371 | -2.354939 | -1.428260 |
| 16 | 6 | -1.433644 | -0.736135 | 1.693938  |
| 17 | 6 | -1.515169 | -3.009495 | 2.518437  |
| 18 | 6 | -1.521190 | -2.192916 | 1.464347  |
| 19 | 6 | 1.145153  | -3.600813 | -0.167226 |
| 20 | 6 | 0.330030  | -4.493342 | -0.789142 |
| 21 | 6 | 0.074798  | -5.533550 | 0.166119  |
| 22 | 6 | 0.752108  | -5.184327 | 1.289125  |
| 23 | 6 | 1.784988  | -2.326595 | -0.587076 |
| 24 | 6 | 3.477810  | 0.417531  | -0.346686 |
| 25 | 6 | 4.086304  | 0.144315  | -1.568735 |
| 26 | 6 | 4.224676  | 0.731846  | 0.789014  |
| 27 | 6 | 5.474487  | 0.193756  | -1.650305 |
| 28 | 6 | 5.608013  | 0.777022  | 0.684598  |
| 29 | 6 | 6.250954  | 0.510412  | -0.531680 |
| 30 | 6 | 7.750230  | 0.589787  | -0.627334 |
| 31 | 1 | -1.754487 | 3.981539  | -2.501390 |
| 32 | 1 | -1.199953 | 5.544097  | 2.230818  |

|    |   |           |           |           |
|----|---|-----------|-----------|-----------|
| 33 | 1 | -1.322997 | 7.175337  | 0.365326  |
| 34 | 1 | -1.598824 | 6.412464  | -1.968082 |
| 35 | 1 | -2.774195 | 1.311821  | -2.087255 |
| 36 | 1 | -0.994378 | 1.159588  | -2.281434 |
| 37 | 1 | -2.296229 | -2.567762 | -2.232141 |
| 38 | 1 | -4.330723 | 0.384589  | 0.139752  |
| 39 | 1 | -4.443888 | -3.755526 | -2.594371 |
| 40 | 1 | -6.467794 | -0.804897 | -0.213536 |
| 41 | 1 | -6.533299 | -2.874576 | -1.581244 |
| 42 | 1 | -1.024898 | -0.903792 | -1.174003 |
| 43 | 1 | -1.432268 | -2.614673 | 3.527581  |
| 44 | 1 | -1.609835 | -2.566703 | 0.450515  |
| 45 | 1 | -0.033032 | -4.425886 | -1.805365 |
| 46 | 1 | -0.528104 | -6.419711 | 0.027921  |
| 47 | 1 | 0.869057  | -5.640225 | 2.261336  |
| 48 | 1 | -1.606557 | -4.083168 | 2.395476  |
| 49 | 1 | 1.551142  | -1.354451 | 1.256106  |
| 50 | 1 | 3.484860  | -0.089155 | -2.441927 |
| 51 | 1 | 3.728465  | 0.950472  | 1.729798  |
| 52 | 1 | 5.962556  | -0.011263 | -2.599005 |
| 53 | 1 | 6.202424  | 1.027960  | 1.558970  |
| 54 | 1 | 2.878900  | -2.414981 | -0.543460 |
| 55 | 1 | 1.492513  | -2.108340 | -1.616955 |
| 56 | 1 | 8.225423  | 0.062087  | 0.205030  |
| 57 | 1 | 8.112164  | 0.159649  | -1.564155 |
| 58 | 1 | 8.081685  | 1.633163  | -0.583573 |
| 59 | 8 | -1.239683 | -0.209257 | 2.772957  |
| 60 | 8 | 1.413060  | -4.014908 | 1.098612  |
| 61 | 8 | 1.148065  | 0.476834  | -1.548091 |

|    |    |           |           |           |
|----|----|-----------|-----------|-----------|
| 62 | 8  | 1.279781  | 1.187113  | 0.875567  |
| 63 | 7  | -1.630567 | 2.038747  | -0.483527 |
| 64 | 7  | -1.624585 | 0.095340  | 0.576996  |
| 65 | 7  | 1.306836  | -1.223072 | 0.270966  |
| 66 | 16 | -1.359269 | 2.485926  | 2.025474  |
| 67 | 16 | 1.715446  | 0.316694  | -0.211708 |

*Transition state (TS):*

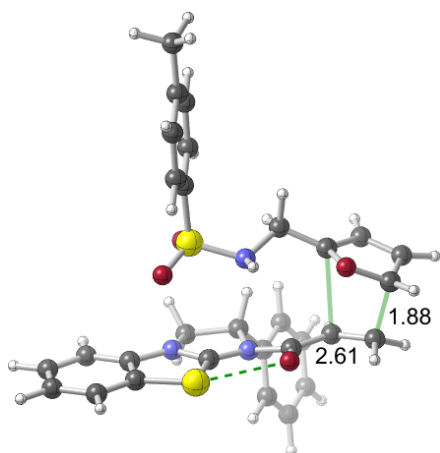

Charge = 1 Multiplicity = 1

Imaginary Frequencies: 1 (-391.4247 1/cm)

Zero-point correction = 0.536995 (Hartree/Particle)

Temperature 298.150 Kelvin. Pressure 1.00000 Atm.

Sum of electronic and thermal Free Energies =

-2420.170366 hartrees (-1518681.10636866 kcal/mol)

Coordinates (from last standard orientation):

| Center<br>Number | Atomic<br>Number | Coordinates (Angstroms) |           |           |
|------------------|------------------|-------------------------|-----------|-----------|
|                  |                  | X                       | Y         | Z         |
| 1                | 6                | 0.149449                | 4.424639  | 1.093271  |
| 2                | 6                | 0.443370                | 3.449186  | 0.146994  |
| 3                | 6                | 0.174959                | 3.635764  | -1.214934 |
| 4                | 6                | -0.409373               | 4.814092  | -1.665389 |
| 5                | 6                | -0.702519               | 5.796354  | -0.724467 |
| 6                | 6                | -0.426373               | 5.603466  | 0.634546  |
| 7                | 6                | 1.194713                | 1.475412  | -0.730666 |
| 8                | 6                | 1.580684                | 1.543727  | 1.543238  |
| 9                | 6                | 1.979124                | 0.143354  | 0.983630  |
| 10               | 6                | 3.378640                | -0.257066 | 1.386773  |
| 11               | 6                | 3.555377                | -1.208162 | 2.391191  |
| 12               | 6                | 4.492739                | 0.342170  | 0.794898  |
| 13               | 6                | 4.839092                | -1.558311 | 2.806438  |
| 14               | 6                | 5.773843                | -0.013433 | 1.205181  |
| 15               | 6                | 5.948985                | -0.962898 | 2.212442  |
| 16               | 6                | 1.814905                | -0.710523 | -1.489382 |
| 17               | 6                | 2.538901                | -2.916480 | -2.176415 |
| 18               | 6                | 2.356665                | -1.985103 | -1.130100 |
| 19               | 6                | 0.040035                | -3.050189 | -0.581286 |
| 20               | 6                | 0.691742                | -4.163602 | -0.026276 |
| 21               | 6                | 1.250902                | -4.842329 | -1.084692 |
| 22               | 6                | 1.028031                | -4.038024 | -2.238473 |
| 23               | 6                | -0.973535               | -2.173096 | 0.075472  |
| 24               | 6                | -3.516348               | -0.326609 | 0.611821  |
| 25               | 6                | -3.821886               | -1.056160 | 1.757898  |

|    |   |           |           |           |
|----|---|-----------|-----------|-----------|
| 26 | 6 | -4.458452 | -0.118498 | -0.395548 |
| 27 | 6 | -5.102122 | -1.584403 | 1.892473  |
| 28 | 6 | -5.730064 | -0.653624 | -0.240374 |
| 29 | 6 | -6.069378 | -1.392243 | 0.901165  |
| 30 | 6 | -7.460784 | -1.940508 | 1.063723  |
| 31 | 1 | 0.362580  | 4.261993  | 2.144724  |
| 32 | 1 | -0.627047 | 4.965362  | -2.717807 |
| 33 | 1 | -1.153133 | 6.727021  | -1.053145 |
| 34 | 1 | -0.666276 | 6.387094  | 1.345622  |
| 35 | 1 | 2.451645  | 2.111487  | 1.880901  |
| 36 | 1 | 0.834313  | 1.470302  | 2.333619  |
| 37 | 1 | 2.685535  | -1.678315 | 2.844508  |
| 38 | 1 | 4.356195  | 1.080338  | 0.007938  |
| 39 | 1 | 4.969819  | -2.300625 | 3.587814  |
| 40 | 1 | 6.637351  | 0.449825  | 0.737663  |
| 41 | 1 | 6.949885  | -1.239472 | 2.529526  |
| 42 | 1 | 1.257741  | -0.609877 | 1.318301  |
| 43 | 1 | 2.440526  | -2.508982 | -3.180512 |
| 44 | 1 | 2.804553  | -2.130737 | -0.157442 |
| 45 | 1 | 0.757325  | -4.384640 | 1.030411  |
| 46 | 1 | 1.892305  | -5.712995 | -1.054886 |
| 47 | 1 | 0.986914  | -4.382146 | -3.264359 |
| 48 | 1 | 3.343279  | -3.639159 | -2.079788 |
| 49 | 1 | -1.301526 | -0.805415 | -1.480364 |
| 50 | 1 | -3.075517 | -1.195835 | 2.533719  |
| 51 | 1 | -4.201830 | 0.462558  | -1.276309 |
| 52 | 1 | -5.355380 | -2.152297 | 2.783235  |
| 53 | 1 | -6.475543 | -0.496289 | -1.014968 |
| 54 | 1 | -1.948749 | -2.678675 | 0.002549  |

|    |    |           |           |           |
|----|----|-----------|-----------|-----------|
| 55 | 1  | -0.715804 | -2.092268 | 1.134654  |
| 56 | 1  | -7.846904 | -2.322483 | 0.114449  |
| 57 | 1  | -7.486828 | -2.745859 | 1.802119  |
| 58 | 1  | -8.143711 | -1.153091 | 1.402672  |
| 59 | 8  | 1.375088  | -0.389261 | -2.591372 |
| 60 | 8  | 0.037153  | -3.128999 | -1.914208 |
| 61 | 8  | -1.222910 | 0.349418  | 1.692541  |
| 62 | 8  | -1.936728 | 1.486445  | -0.454183 |
| 63 | 7  | 1.008696  | 2.197105  | 0.364221  |
| 64 | 7  | 1.804091  | 0.308385  | -0.486138 |
| 65 | 7  | -1.020178 | -0.827431 | -0.497904 |
| 66 | 16 | 0.645475  | 2.223809  | -2.173866 |
| 67 | 16 | -1.874771 | 0.298972  | 0.386538  |

*Product:*



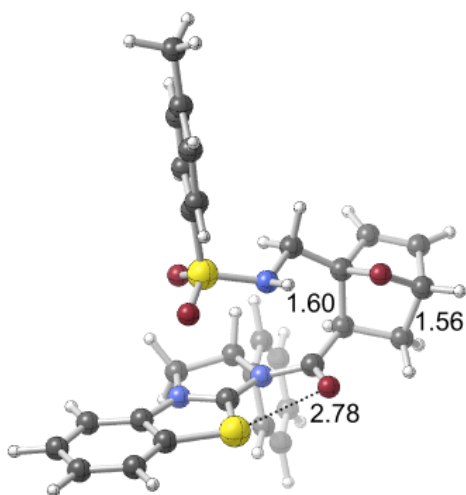

Charge = 1 Multiplicity = 1

Imaginary Frequencies: none found

Zero-point correction = 0.540638 (Hartree/Particle)

Temperature 298.150 Kelvin. Pressure 1.00000 Atm.

Sum of electronic and thermal Free Energies =

-2420.207727 hartrees (-1518704.55076977 kcal/mol)

Coordinates (from last standard orientation):

| -----  |        |                         |          |           |  |
|--------|--------|-------------------------|----------|-----------|--|
| Center | Atomic | Coordinates (Angstroms) |          |           |  |
| Number | Number | X                       | Y        | Z         |  |
| -----  |        |                         |          |           |  |
| 1      | 6      | -0.616576               | 4.506113 | -1.113659 |  |
| 2      | 6      | -0.796031               | 3.490553 | -0.179548 |  |
| 3      | 6      | -0.551790               | 3.686351 | 1.185532  |  |
| 4      | 6      | -0.111681               | 4.919541 | 1.655959  |  |
| 5      | 6      | 0.071194                | 5.938366 | 0.727585  |  |
| 6      | 6      | -0.177539               | 5.734085 | -0.636624 |  |
| 7      | 6      | -1.294779               | 1.430767 | 0.663844  |  |
| 8      | 6      | -1.635675               | 1.470499 | -1.623009 |  |

|    |   |           |           |           |
|----|---|-----------|-----------|-----------|
| 9  | 6 | -1.900108 | 0.027535  | -1.088606 |
| 10 | 6 | -3.283779 | -0.481463 | -1.419216 |
| 11 | 6 | -3.436996 | -1.488970 | -2.371384 |
| 12 | 6 | -4.410908 | 0.074639  | -0.809342 |
| 13 | 6 | -4.710974 | -1.935566 | -2.718721 |
| 14 | 6 | -5.681509 | -0.375244 | -1.153138 |
| 15 | 6 | -5.833050 | -1.379384 | -2.110139 |
| 16 | 6 | -1.537204 | -0.836222 | 1.356850  |
| 17 | 6 | -2.124253 | -3.177489 | 2.035960  |
| 18 | 6 | -1.606478 | -2.268052 | 0.891052  |
| 19 | 6 | -0.146608 | -2.884866 | 0.685182  |
| 20 | 6 | -0.382134 | -4.261940 | 0.074277  |
| 21 | 6 | -0.819427 | -5.023854 | 1.074578  |
| 22 | 6 | -0.894010 | -4.098921 | 2.277309  |
| 23 | 6 | 0.944482  | -2.082765 | 0.011213  |
| 24 | 6 | 3.544283  | -0.116633 | -0.550845 |
| 25 | 6 | 3.816575  | -0.834270 | -1.713512 |
| 26 | 6 | 4.534062  | 0.148895  | 0.393577  |
| 27 | 6 | 5.112400  | -1.290027 | -1.928250 |
| 28 | 6 | 5.821799  | -0.316401 | 0.159198  |
| 29 | 6 | 6.128510  | -1.040836 | -0.998937 |
| 30 | 1 | -0.811976 | 4.332267  | -2.166830 |
| 31 | 1 | 0.081070  | 5.079516  | 2.711810  |
| 32 | 1 | 0.413865  | 6.909275  | 1.069208  |
| 33 | 1 | -0.024898 | 6.549122  | -1.336079 |
| 34 | 1 | -2.542888 | 1.932882  | -2.017771 |
| 35 | 1 | -0.835121 | 1.493194  | -2.361757 |
| 36 | 1 | -2.556972 | -1.924007 | -2.839578 |
| 37 | 1 | -4.292858 | 0.857517  | -0.062930 |

|    |    |           |           |           |
|----|----|-----------|-----------|-----------|
| 38 | 1  | -4.824363 | -2.718711 | -3.461894 |
| 39 | 1  | -6.554796 | 0.057961  | -0.675272 |
| 40 | 1  | -6.825760 | -1.728025 | -2.377993 |
| 41 | 1  | -1.139719 | -0.651824 | -1.480613 |
| 42 | 1  | -2.333608 | -2.586787 | 2.928492  |
| 43 | 1  | -2.190286 | -2.348120 | -0.026326 |
| 44 | 1  | -0.284325 | -4.491392 | -0.980662 |
| 45 | 1  | -1.178352 | -6.045538 | 1.045158  |
| 46 | 1  | -0.815887 | -4.536360 | 3.270648  |
| 47 | 1  | -3.016987 | -3.736196 | 1.752165  |
| 48 | 1  | 1.517658  | -0.840715 | 1.604858  |
| 49 | 1  | 3.032150  | -1.017387 | -2.441292 |
| 50 | 1  | 4.300635  | 0.718272  | 1.288290  |
| 51 | 1  | 5.340116  | -1.847324 | -2.832798 |
| 52 | 1  | 6.603746  | -0.115501 | 0.886224  |
| 53 | 1  | 1.861451  | -2.685477 | 0.023728  |
| 54 | 1  | 0.663364  | -1.908349 | -1.031407 |
| 55 | 8  | -1.348563 | -0.491347 | 2.503971  |
| 56 | 8  | 0.190445  | -3.196616 | 2.028301  |
| 57 | 8  | 1.164763  | 0.474505  | -1.490895 |
| 58 | 8  | 1.928976  | 1.576132  | 0.652017  |
| 59 | 7  | -1.215142 | 2.185898  | -0.415590 |
| 60 | 7  | -1.682654 | 0.170718  | 0.383665  |
| 61 | 7  | 1.136216  | -0.783097 | 0.658637  |
| 62 | 16 | -0.872311 | 2.221084  | 2.122417  |
| 63 | 16 | 1.886519  | 0.410330  | -0.220923 |
| 64 | 6  | 7.533548  | -1.514393 | -1.255001 |
| 65 | 1  | 8.089994  | -0.764648 | -1.829341 |
| 66 | 1  | 8.071533  | -1.679174 | -0.317788 |

67 1 7.539894 -2.443398 -1.831380

*Lactam:*

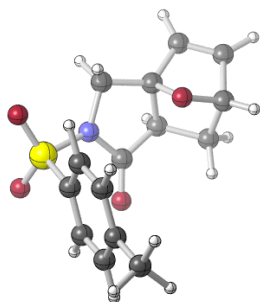

Charge = 0 Multiplicity = 1

Imaginary Frequencies: none found

Zero-point correction = 0.285295 (Hartree/Particle)

Temperature 298.150 Kelvin. Pressure 1.00000 Atm.

Sum of electronic and thermal Free Energies =

-1333.747866 hartrees (-836940.12339366 kcal/mol)

Coordinates (from last standard orientation):

-----

| Center<br>Number | Atomic<br>Number | Coordinates (Angstroms) |           |           |
|------------------|------------------|-------------------------|-----------|-----------|
|                  |                  | X                       | Y         | Z         |
| 1                | 6                | 1.112092                | 0.544741  | -1.209613 |
| 2                | 6                | 2.729669                | -1.470075 | -1.396716 |
| 3                | 6                | 2.509537                | -0.003034 | -0.989170 |
| 4                | 6                | 2.553269                | -0.087389 | 0.568462  |
| 5                | 6                | 3.973213                | -0.388643 | 0.994317  |
| 6                | 6                | 4.166269                | -1.659439 | 0.634053  |

-----

|    |    |           |           |           |
|----|----|-----------|-----------|-----------|
| 7  | 6  | 2.852468  | -2.123348 | 0.017364  |
| 8  | 6  | 1.690535  | 1.044318  | 1.082583  |
| 9  | 6  | -1.890890 | 0.592434  | 0.144866  |
| 10 | 6  | -2.167647 | -0.053994 | 1.347002  |
| 11 | 6  | -2.460835 | 0.181914  | -1.058865 |
| 12 | 6  | -3.036285 | -1.139553 | 1.335636  |
| 13 | 6  | -3.325995 | -0.904638 | -1.045445 |
| 14 | 6  | -3.621641 | -1.580857 | 0.144816  |
| 15 | 1  | 1.859784  | -1.867669 | -1.925837 |
| 16 | 1  | 3.234425  | 0.701958  | -1.406072 |
| 17 | 1  | 4.683383  | 0.332640  | 1.379951  |
| 18 | 1  | 5.082644  | -2.236729 | 0.660043  |
| 19 | 1  | 2.615007  | -3.184731 | 0.069859  |
| 20 | 1  | 3.618327  | -1.616522 | -2.012313 |
| 21 | 1  | -1.723225 | 0.294386  | 2.274201  |
| 22 | 1  | -2.222388 | 0.703045  | -1.979327 |
| 23 | 1  | -3.262460 | -1.653270 | 2.265824  |
| 24 | 1  | -3.778651 | -1.239029 | -1.975264 |
| 25 | 1  | 1.152958  | 0.761955  | 1.989840  |
| 26 | 1  | 2.267224  | 1.954871  | 1.262591  |
| 27 | 8  | 0.402163  | 0.425106  | -2.181451 |
| 28 | 8  | 1.899668  | -1.346493 | 0.752450  |
| 29 | 8  | -0.706953 | 2.515651  | 1.496227  |
| 30 | 8  | -1.010328 | 2.796633  | -0.994181 |
| 31 | 7  | 0.757877  | 1.234701  | -0.046081 |
| 32 | 16 | -0.755730 | 1.948431  | 0.155780  |
| 33 | 6  | -4.573404 | -2.746383 | 0.138269  |
| 34 | 1  | -5.606552 | -2.397157 | 0.029516  |
| 35 | 1  | -4.365074 | -3.417565 | -0.700201 |

36 1 -4.507382 -3.317491 1.067559

*DAL process leading to exo cycloadduct (opposite enantiomer):*

*Reactant:*

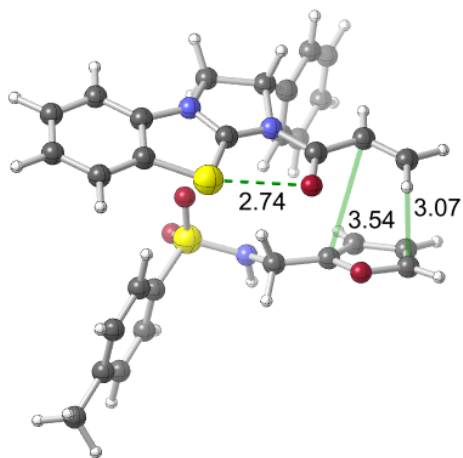

Charge = 1 Multiplicity = 1

Imaginary Frequencies: none found

Zero-point correction = 0.535793 (Hartree/Particle)

Temperature 298.150 Kelvin. Pressure 1.00000 Atm.

Sum of electronic and thermal Free Energies =

-2420.197322 hartrees (-1518698.02152822 kcal/mol)

Coordinates (from last standard orientation):

| -----  |        |                         |          |          |  |
|--------|--------|-------------------------|----------|----------|--|
| Center | Atomic | Coordinates (Angstroms) |          |          |  |
| Number | Number | X                       | Y        | Z        |  |
| -----  |        |                         |          |          |  |
| 1      | 6      | 1.860144                | 4.103024 | 0.742641 |  |

|    |   |           |           |           |
|----|---|-----------|-----------|-----------|
| 2  | 6 | 1.252917  | 3.215903  | -0.140085 |
| 3  | 6 | 1.956569  | 2.624838  | -1.196484 |
| 4  | 6 | 3.303140  | 2.911957  | -1.400994 |
| 5  | 6 | 3.916913  | 3.794584  | -0.518944 |
| 6  | 6 | 3.205406  | 4.380289  | 0.536726  |
| 7  | 6 | -0.359101 | 1.886660  | -1.055566 |
| 8  | 6 | -1.149691 | 2.909392  | 0.845103  |
| 9  | 6 | -2.325828 | 2.176148  | 0.138026  |
| 10 | 6 | -3.124434 | 1.342642  | 1.109151  |
| 11 | 6 | -4.361781 | 1.810824  | 1.550828  |
| 12 | 6 | -2.608396 | 0.149728  | 1.616461  |
| 13 | 6 | -5.075275 | 1.093175  | 2.509424  |
| 14 | 6 | -3.323180 | -0.565050 | 2.572071  |
| 15 | 6 | -4.556045 | -0.093127 | 3.022873  |
| 16 | 6 | -2.116066 | 0.512696  | -1.906000 |
| 17 | 6 | -4.033962 | -0.661451 | -2.770356 |
| 18 | 6 | -3.529370 | 0.116932  | -1.809599 |
| 19 | 6 | -1.530844 | -2.644030 | -0.865486 |
| 20 | 6 | -2.605471 | -2.997157 | -0.108627 |
| 21 | 6 | -3.561677 | -3.559469 | -1.017190 |
| 22 | 6 | -2.991876 | -3.497124 | -2.247246 |
| 23 | 6 | -0.186001 | -2.076442 | -0.542572 |
| 24 | 6 | 2.684947  | -1.510879 | 1.021567  |
| 25 | 6 | 3.269403  | -2.616376 | 1.641596  |
| 26 | 6 | 3.317123  | -0.843806 | -0.021022 |
| 27 | 6 | 4.508765  | -3.052568 | 1.196682  |
| 28 | 6 | 4.562338  | -1.295097 | -0.450882 |
| 29 | 6 | 5.171527  | -2.401122 | 0.145957  |
| 30 | 6 | 6.521681  | -2.885102 | -0.308883 |

|    |   |           |           |           |
|----|---|-----------|-----------|-----------|
| 31 | 1 | 1.299481  | 4.548447  | 1.557881  |
| 32 | 1 | 3.856558  | 2.456718  | -2.216341 |
| 33 | 1 | 4.967471  | 4.030343  | -0.651747 |
| 34 | 1 | 3.713743  | 5.063091  | 1.209399  |
| 35 | 1 | -0.842806 | 2.399587  | 1.762824  |
| 36 | 1 | -1.378582 | 3.956046  | 1.044320  |
| 37 | 1 | -4.765470 | 2.736500  | 1.148236  |
| 38 | 1 | -1.652869 | -0.222186 | 1.257420  |
| 39 | 1 | -6.036657 | 1.461828  | 2.853432  |
| 40 | 1 | -2.911049 | -1.488995 | 2.968239  |
| 41 | 1 | -5.111022 | -0.650087 | 3.771638  |
| 42 | 1 | -2.973712 | 2.900895  | -0.363902 |
| 43 | 1 | -3.418895 | -0.982642 | -3.605939 |
| 44 | 1 | -4.126394 | 0.459169  | -0.972865 |
| 45 | 1 | -5.071505 | -0.978362 | -2.749278 |
| 46 | 1 | -2.701560 | -2.874084 | 0.960443  |
| 47 | 1 | -4.541102 | -3.950401 | -0.780876 |
| 48 | 1 | -3.310967 | -3.797794 | -3.234394 |
| 49 | 1 | 0.599865  | -2.673635 | -1.024481 |
| 50 | 1 | -0.099593 | -1.052266 | -0.922579 |
| 51 | 1 | 0.025178  | -2.951015 | 1.352891  |
| 52 | 1 | 2.767530  | -3.115981 | 2.465380  |
| 53 | 1 | 2.850044  | 0.025324  | -0.473074 |
| 54 | 1 | 4.977310  | -3.909401 | 1.673559  |
| 55 | 1 | 5.068642  | -0.775694 | -1.259808 |
| 56 | 1 | 7.269115  | -2.739660 | 0.478607  |
| 57 | 1 | 6.495501  | -3.955158 | -0.537772 |
| 58 | 1 | 6.856042  | -2.348705 | -1.200143 |
| 59 | 8 | -1.344404 | 0.128926  | -2.768060 |



|    |    |           |           |           |
|----|----|-----------|-----------|-----------|
| 60 | 8  | -1.751756 | -2.946920 | -2.166902 |
| 61 | 8  | 0.988339  | -1.161408 | 2.996847  |
| 62 | 8  | 0.805170  | 0.315787  | 0.945994  |
| 63 | 7  | -0.069742 | 2.784889  | -0.134612 |
| 64 | 7  | -1.612269 | 1.400068  | -0.932219 |
| 65 | 7  | -0.036710 | -2.031495 | 0.912002  |
| 66 | 16 | 0.927228  | 1.528754  | -2.131514 |
| 67 | 16 | 1.078816  | -0.986075 | 1.554931  |

*Transition state (TS):*

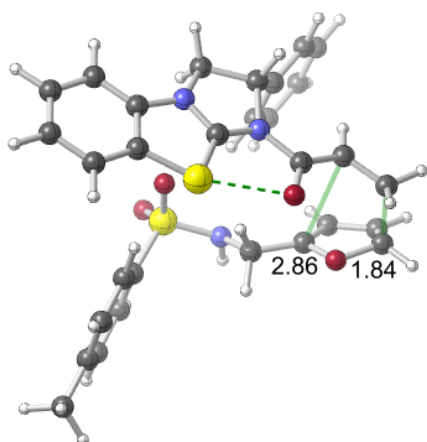

Charge = 1 Multiplicity = 1

Imaginary Frequencies: 1 (-346.2447 1/cm)

Zero-point correction = 0.535935 (Hartree/Particle)

Temperature 298.150 Kelvin. Pressure 1.00000 Atm.

Sum of electronic and thermal Free Energies =

-2420.171535 hartrees (-1518681.83992785 kcal/mol)

Coordinates (from last standard orientation):

| Center<br>Number | Atomic<br>Number | Coordinates (Angstroms) |           |           |
|------------------|------------------|-------------------------|-----------|-----------|
|                  |                  | X                       | Y         | Z         |
| 1                | 6                | 1.675773                | 4.296565  | 0.802051  |
| 2                | 6                | 1.164723                | 3.353832  | -0.082562 |
| 3                | 6                | 1.945983                | 2.797485  | -1.102316 |
| 4                | 6                | 3.270891                | 3.184823  | -1.269657 |
| 5                | 6                | 3.790472                | 4.127472  | -0.386276 |
| 6                | 6                | 3.004021                | 4.672053  | 0.635294  |
| 7                | 6                | -0.318157               | 1.880881  | -1.017309 |
| 8                | 6                | -1.252733               | 2.909074  | 0.811283  |
| 9                | 6                | -2.336330               | 2.071345  | 0.073529  |
| 10               | 6                | -3.142832               | 1.242378  | 1.042362  |
| 11               | 6                | -4.474141               | 1.566850  | 1.299925  |
| 12               | 6                | -2.541096               | 0.186754  | 1.727104  |
| 13               | 6                | -5.196642               | 0.841894  | 2.247357  |
| 14               | 6                | -3.261916               | -0.537221 | 2.670315  |
| 15               | 6                | -4.592287               | -0.209095 | 2.933443  |
| 16               | 6                | -1.918691               | 0.327955  | -1.909051 |
| 17               | 6                | -3.658948               | -1.174546 | -2.743011 |
| 18               | 6                | -3.190354               | -0.261364 | -1.764725 |
| 19               | 6                | -1.570258               | -2.454564 | -0.889059 |
| 20               | 6                | -2.702127               | -2.824601 | -0.146501 |
| 21               | 6                | -3.654331               | -3.193052 | -1.073169 |
| 22               | 6                | -3.119611               | -2.891550 | -2.359351 |
| 23               | 6                | -0.187239               | -2.050744 | -0.498793 |
| 24               | 6                | 2.678488                | -1.599465 | 1.029723  |
| 25               | 6                | 3.237730                | -2.722522 | 1.641263  |

|    |   |           |           |           |
|----|---|-----------|-----------|-----------|
| 26 | 6 | 3.300678  | -0.967299 | -0.040916 |
| 27 | 6 | 4.440664  | -3.214902 | 1.156424  |
| 28 | 6 | 4.508440  | -1.476359 | -0.510826 |
| 29 | 6 | 5.090316  | -2.603200 | 0.074247  |
| 30 | 6 | 6.397360  | -3.153098 | -0.428534 |
| 31 | 1 | 1.057593  | 4.712361  | 1.590869  |
| 32 | 1 | 3.882915  | 2.760686  | -2.059715 |
| 33 | 1 | 4.823987  | 4.440195  | -0.491667 |
| 34 | 1 | 3.435883  | 5.400953  | 1.312999  |
| 35 | 1 | -0.961561 | 2.451145  | 1.761587  |
| 36 | 1 | -1.565566 | 3.941920  | 0.966260  |
| 37 | 1 | -4.946563 | 2.384642  | 0.761305  |
| 38 | 1 | -1.509208 | -0.068598 | 1.508199  |
| 39 | 1 | -6.232135 | 1.099479  | 2.448048  |
| 40 | 1 | -2.780369 | -1.355069 | 3.199343  |
| 41 | 1 | -5.155661 | -0.770632 | 3.672628  |
| 42 | 1 | -2.997772 | 2.726894  | -0.501568 |
| 43 | 1 | -3.176922 | -1.104207 | -3.717200 |
| 44 | 1 | -3.802526 | -0.019627 | -0.907451 |
| 45 | 1 | -4.735892 | -1.310069 | -2.811104 |
| 46 | 1 | -2.783307 | -2.792884 | 0.930410  |
| 47 | 1 | -4.676601 | -3.494534 | -0.886048 |
| 48 | 1 | -3.346604 | -3.431691 | -3.271721 |
| 49 | 1 | 0.525351  | -2.742774 | -0.967476 |
| 50 | 1 | 0.014750  | -1.053723 | -0.911517 |
| 51 | 1 | -0.019029 | -2.932356 | 1.390680  |
| 52 | 1 | 2.744640  | -3.193085 | 2.487103  |
| 53 | 1 | 2.855442  | -0.082828 | -0.485664 |
| 54 | 1 | 4.889922  | -4.086426 | 1.625226  |

|    |    |           |           |           |
|----|----|-----------|-----------|-----------|
| 55 | 1  | 5.005985  | -0.986770 | -1.343187 |
| 56 | 1  | 7.178556  | -3.046657 | 0.331936  |
| 57 | 1  | 6.309252  | -4.220225 | -0.656082 |
| 58 | 1  | 6.726165  | -2.632426 | -1.331064 |
| 59 | 8  | -1.065400 | 0.087679  | -2.773073 |
| 60 | 8  | -1.756136 | -2.673200 | -2.177953 |
| 61 | 8  | 1.021264  | -1.205748 | 3.035706  |
| 62 | 8  | 0.877879  | 0.305938  | 1.005301  |
| 63 | 7  | -0.124431 | 2.832289  | -0.114709 |
| 64 | 7  | -1.515507 | 1.297953  | -0.915766 |
| 65 | 7  | -0.059796 | -2.009989 | 0.953207  |
| 66 | 16 | 1.028587  | 1.615856  | -2.056411 |
| 67 | 16 | 1.108256  | -1.010074 | 1.596556  |

*Intermediate (INT):*

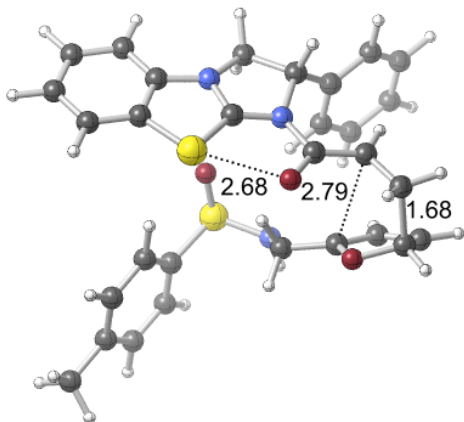

Charge = 1 Multiplicity = 1

Imaginary Frequencies: none found

Zero-point correction = 0.537320 (Hartree/Particle)

Temperature 298.150 Kelvin. Pressure 1.00000 Atm.

Sum of electronic and thermal Free Energies =

-2420.168195 hartrees (-1518679.74404445 kcal/mol)

Coordinates (from last standard orientation):

| -----  |        |                         |          |           |  |
|--------|--------|-------------------------|----------|-----------|--|
| Center | Atomic | Coordinates (Angstroms) |          |           |  |
| Number | Number | X                       | Y        | Z         |  |
| -----  |        |                         |          |           |  |
| 1      | 6      | 2.025899                | 4.167822 | 0.509876  |  |
| 2      | 6      | 1.492340                | 3.146759 | -0.268770 |  |
| 3      | 6      | 2.287821                | 2.386877 | -1.135310 |  |
| 4      | 6      | 3.650387                | 2.641110 | -1.249994 |  |
| 5      | 6      | 4.192625                | 3.658890 | -0.469756 |  |
| 6      | 6      | 3.390856                | 4.409238 | 0.398107  |  |
| 7      | 6      | -0.051848               | 1.680439 | -1.114560 |  |

|    |   |           |           |           |
|----|---|-----------|-----------|-----------|
| 8  | 6 | -1.010864 | 3.021963  | 0.482652  |
| 9  | 6 | -2.111203 | 2.191068  | -0.235287 |
| 10 | 6 | -3.078947 | 1.585507  | 0.751038  |
| 11 | 6 | -4.366561 | 2.110003  | 0.855636  |
| 12 | 6 | -2.681276 | 0.547603  | 1.594715  |
| 13 | 6 | -5.252985 | 1.602790  | 1.805017  |
| 14 | 6 | -3.568109 | 0.038888  | 2.538269  |
| 15 | 6 | -4.855475 | 0.566126  | 2.645955  |
| 16 | 6 | -1.732065 | 0.170644  | -1.942159 |
| 17 | 6 | -3.563640 | -1.282787 | -2.733910 |
| 18 | 6 | -3.049083 | -0.274757 | -1.825080 |
| 19 | 6 | -1.782508 | -2.451342 | -0.635200 |
| 20 | 6 | -2.994863 | -2.613998 | 0.086377  |
| 21 | 6 | -3.932496 | -2.958539 | -0.842499 |
| 22 | 6 | -3.308980 | -2.837774 | -2.150960 |
| 23 | 6 | -0.383408 | -2.169914 | -0.206331 |
| 24 | 6 | 2.437198  | -1.620659 | 1.140964  |
| 25 | 6 | 2.696817  | -2.986088 | 1.229332  |
| 26 | 6 | 3.358792  | -0.737880 | 0.581876  |
| 27 | 6 | 3.902191  | -3.471740 | 0.734963  |
| 28 | 6 | 4.559634  | -1.242848 | 0.098818  |
| 29 | 6 | 4.846831  | -2.611393 | 0.164706  |
| 30 | 1 | 1.395211  | 4.744752  | 1.178185  |
| 31 | 1 | 4.272807  | 2.059362  | -1.923075 |
| 32 | 1 | 5.254435  | 3.871502  | -0.536988 |
| 33 | 1 | 3.840380  | 5.195337  | 0.995942  |
| 34 | 1 | -0.831143 | 2.664626  | 1.501321  |
| 35 | 1 | -1.237792 | 4.088217  | 0.487459  |
| 36 | 1 | -4.674921 | 2.915698  | 0.193909  |

|    |    |           |           |           |
|----|----|-----------|-----------|-----------|
| 37 | 1  | -1.680424 | 0.136376  | 1.500186  |
| 38 | 1  | -6.253416 | 2.016976  | 1.884759  |
| 39 | 1  | -3.251211 | -0.769918 | 3.191203  |
| 40 | 1  | -5.546461 | 0.169474  | 3.383649  |
| 41 | 1  | -2.656079 | 2.818654  | -0.948217 |
| 42 | 1  | -3.027727 | -1.314488 | -3.684219 |
| 43 | 1  | -4.639596 | -1.229436 | -2.902443 |
| 44 | 1  | -3.111057 | -2.462771 | 1.150419  |
| 45 | 1  | -4.991109 | -3.121071 | -0.685103 |
| 46 | 1  | -3.543635 | -3.536409 | -2.949688 |
| 47 | 1  | 0.252455  | -2.997315 | -0.550245 |
| 48 | 1  | -0.043221 | -1.273367 | -0.743334 |
| 49 | 1  | -0.359918 | -2.814236 | 1.785806  |
| 50 | 1  | 1.971222  | -3.666972 | 1.668119  |
| 51 | 1  | 3.135356  | 0.323583  | 0.529798  |
| 52 | 1  | 4.113909  | -4.535529 | 0.792295  |
| 53 | 1  | 5.288683  | -0.564194 | -0.336527 |
| 54 | 8  | -0.836260 | -0.256731 | -2.693136 |
| 55 | 8  | -1.918937 | -2.815835 | -1.885666 |
| 56 | 8  | 0.888539  | -1.142451 | 3.244629  |
| 57 | 8  | 0.720245  | 0.342409  | 1.209069  |
| 58 | 7  | 0.165873  | 2.733188  | -0.334770 |
| 59 | 7  | -1.300119 | 1.221489  | -1.038078 |
| 60 | 7  | -0.298707 | -1.959272 | 1.231688  |
| 61 | 16 | 1.337910  | 1.152234  | -1.984456 |
| 62 | 16 | 0.921809  | -0.978860 | 1.798257  |
| 63 | 1  | -3.698012 | 0.144161  | -1.069279 |
| 64 | 6  | 6.149410  | -3.137016 | -0.374302 |
| 65 | 1  | 6.237605  | -4.214985 | -0.219923 |

|    |   |          |           |           |
|----|---|----------|-----------|-----------|
| 66 | 1 | 6.234083 | -2.935079 | -1.447318 |
| 67 | 1 | 6.997092 | -2.647877 | 0.116348  |

*Transition state 2 (TS2):*

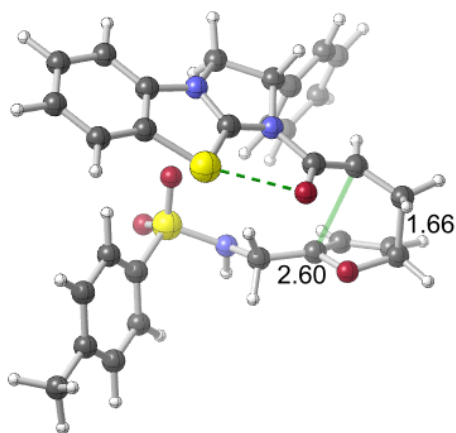

Charge = 1 Multiplicity = 1

Imaginary Frequencies: 1 (-118.7920 1/cm)

Zero-point correction = 0.537206 (Hartree/Particle)

Temperature 298.150 Kelvin. Pressure 1.00000 Atm.

Sum of electronic and thermal Free Energies =

-2420.169404 hartrees (-1518680.50270404 kcal/mol)

Coordinates (from last standard orientation):

```

-----
Center   Atomic      Coordinates (Angstroms)
Number   Number      X         Y         Z
-----
1        6           2.056861  4.170593  0.498418
2        6           1.520001  3.150457 -0.279270
3        6           2.312655  2.388288 -1.146268
-----

```



|    |   |           |           |           |
|----|---|-----------|-----------|-----------|
| 4  | 6 | 3.676245  | 2.637242  | -1.261701 |
| 5  | 6 | 4.221441  | 3.653560  | -0.482079 |
| 6  | 6 | 3.422290  | 4.407430  | 0.385523  |
| 7  | 6 | -0.027197 | 1.686259  | -1.119712 |
| 8  | 6 | -0.979510 | 3.024415  | 0.483720  |
| 9  | 6 | -2.083694 | 2.199588  | -0.232799 |
| 10 | 6 | -3.062553 | 1.610563  | 0.751869  |
| 11 | 6 | -4.347304 | 2.144339  | 0.844648  |
| 12 | 6 | -2.677819 | 0.573623  | 1.602538  |
| 13 | 6 | -5.243649 | 1.645889  | 1.789610  |
| 14 | 6 | -3.575079 | 0.072236  | 2.539833  |
| 15 | 6 | -4.859594 | 0.608633  | 2.635986  |
| 16 | 6 | -1.706450 | 0.169335  | -1.928867 |
| 17 | 6 | -3.554823 | -1.294647 | -2.697848 |
| 18 | 6 | -2.997072 | -0.348306 | -1.742229 |
| 19 | 6 | -1.804078 | -2.389684 | -0.672218 |
| 20 | 6 | -3.011024 | -2.626846 | 0.054662  |
| 21 | 6 | -3.927321 | -3.015470 | -0.871716 |
| 22 | 6 | -3.300104 | -2.856305 | -2.182845 |
| 23 | 6 | -0.404520 | -2.124434 | -0.222244 |
| 24 | 6 | 2.409355  | -1.632080 | 1.163329  |
| 25 | 6 | 2.656560  | -2.996448 | 1.294180  |
| 26 | 6 | 3.334222  | -0.777208 | 0.567971  |
| 27 | 6 | 3.852284  | -3.510063 | 0.804690  |
| 28 | 6 | 4.524904  | -1.309753 | 0.089656  |
| 29 | 6 | 4.799081  | -2.678297 | 0.196516  |
| 30 | 1 | 1.428288  | 4.749557  | 1.166925  |
| 31 | 1 | 4.296709  | 2.052961  | -1.934319 |
| 32 | 1 | 5.283966  | 3.862491  | -0.549281 |

|    |    |           |           |           |
|----|----|-----------|-----------|-----------|
| 33 | 1  | 3.874828  | 5.192443  | 0.982459  |
| 34 | 1  | -0.793822 | 2.661397  | 1.499234  |
| 35 | 1  | -1.205802 | 4.090699  | 0.494633  |
| 36 | 1  | -4.646204 | 2.949417  | 0.177912  |
| 37 | 1  | -1.680731 | 0.153608  | 1.513487  |
| 38 | 1  | -6.241947 | 2.066697  | 1.860896  |
| 39 | 1  | -3.268550 | -0.737505 | 3.196402  |
| 40 | 1  | -5.559034 | 0.218009  | 3.368905  |
| 41 | 1  | -2.617148 | 2.828808  | -0.952660 |
| 42 | 1  | -3.044467 | -1.271375 | -3.662213 |
| 43 | 1  | -4.632745 | -1.204383 | -2.834953 |
| 44 | 1  | -3.136480 | -2.471932 | 1.117545  |
| 45 | 1  | -4.978326 | -3.223880 | -0.718573 |
| 46 | 1  | -3.524871 | -3.542472 | -2.994967 |
| 47 | 1  | 0.215368  | -2.971659 | -0.546513 |
| 48 | 1  | -0.024614 | -1.242494 | -0.753656 |
| 49 | 1  | -0.424744 | -2.762596 | 1.771261  |
| 50 | 1  | 1.927518  | -3.653855 | 1.762120  |
| 51 | 1  | 3.122216  | 0.284656  | 0.485616  |
| 52 | 1  | 4.054550  | -4.573494 | 0.894782  |
| 53 | 1  | 5.255535  | -0.652457 | -0.375049 |
| 54 | 8  | -0.840546 | -0.219744 | -2.726600 |
| 55 | 8  | -1.911560 | -2.824967 | -1.910291 |
| 56 | 8  | 0.842850  | -1.120799 | 3.245467  |
| 57 | 8  | 0.733822  | 0.365916  | 1.206501  |
| 58 | 7  | 0.192498  | 2.738660  | -0.342121 |
| 59 | 7  | -1.274385 | 1.219500  | -1.029833 |
| 60 | 7  | -0.336409 | -1.910107 | 1.216895  |
| 61 | 16 | 1.357396  | 1.160021  | -1.997208 |



| Center<br>Number | Atomic<br>Number | Coordinates (Angstroms) |           |           |
|------------------|------------------|-------------------------|-----------|-----------|
|                  |                  | X                       | Y         | Z         |
| 1                | 6                | 5.353866                | -1.967153 | 0.597749  |
| 2                | 6                | 4.152767                | -1.669738 | -0.038560 |
| 3                | 6                | 3.478395                | -2.608940 | -0.827986 |
| 4                | 6                | 3.997144                | -3.888811 | -1.002682 |
| 5                | 6                | 5.195713                | -4.193335 | -0.367528 |
| 6                | 6                | 5.863847                | -3.246363 | 0.420423  |
| 7                | 6                | 2.327798                | -0.465957 | -0.702272 |
| 8                | 6                | 3.718953                | 0.828516  | 0.617718  |
| 9                | 6                | 2.475366                | 1.677099  | 0.196883  |
| 10               | 6                | 1.725943                | 2.221661  | 1.389338  |
| 11               | 6                | 1.796553                | 3.586289  | 1.671947  |
| 12               | 6                | 1.007107                | 1.371115  | 2.230297  |
| 13               | 6                | 1.155533                | 4.099344  | 2.797402  |
| 14               | 6                | 0.359167                | 1.886794  | 3.348978  |
| 15               | 6                | 0.437195                | 3.249461  | 3.635757  |
| 16               | 6                | 0.560317                | 0.957060  | -1.454162 |
| 17               | 6                | 0.193484                | 3.177440  | -2.594251 |
| 18               | 6                | -0.098089               | 2.300651  | -1.338183 |
| 19               | 6                | -1.677258               | 2.200714  | -1.428263 |
| 20               | 6                | -2.148871               | 3.582028  | -0.985032 |
| 21               | 6                | -1.889309               | 4.387238  | -2.014606 |
| 22               | 6                | -1.255599               | 3.497132  | -3.070140 |
| 23               | 6                | -2.340242               | 0.979862  | -0.824674 |
| 24               | 6                | -3.079689               | -1.669675 | 0.801427  |
| 25               | 6                | -4.186247               | -1.628039 | 1.649196  |

|    |   |           |           |           |
|----|---|-----------|-----------|-----------|
| 26 | 6 | -3.080653 | -2.436915 | -0.360223 |
| 27 | 6 | -5.310765 | -2.371706 | 1.317234  |
| 28 | 6 | -4.218617 | -3.173726 | -0.675483 |
| 29 | 6 | -5.344374 | -3.150958 | 0.152969  |
| 30 | 1 | 5.859443  | -1.223880 | 1.205668  |
| 31 | 1 | 3.482433  | -4.624867 | -1.611449 |
| 32 | 1 | 5.620020  | -5.184674 | -0.485821 |
| 33 | 1 | 6.796986  | -3.515689 | 0.903812  |
| 34 | 1 | 3.783516  | 0.704699  | 1.700263  |
| 35 | 1 | 4.652282  | 1.239182  | 0.230216  |
| 36 | 1 | 2.352014  | 4.245386  | 1.008759  |
| 37 | 1 | 0.942860  | 0.309113  | 2.002435  |
| 38 | 1 | 1.213867  | 5.161429  | 3.015038  |
| 39 | 1 | -0.216132 | 1.221384  | 3.984177  |
| 40 | 1 | -0.065975 | 3.649823  | 4.510896  |
| 41 | 1 | 2.785520  | 2.496871  | -0.455739 |
| 42 | 1 | 0.709301  | 2.603420  | -3.367650 |
| 43 | 1 | 0.776768  | 4.068594  | -2.356350 |
| 44 | 1 | -2.500633 | 3.829551  | 0.010419  |
| 45 | 1 | -1.989240 | 5.464136  | -2.079164 |
| 46 | 1 | -1.348753 | 3.791313  | -4.114264 |
| 47 | 1 | -3.425524 | 1.051197  | -0.950739 |
| 48 | 1 | -1.988331 | 0.096477  | -1.363209 |
| 49 | 1 | -2.581763 | 1.372418  | 1.229096  |
| 50 | 1 | -4.161337 | -1.031171 | 2.556081  |
| 51 | 1 | -2.202922 | -2.461411 | -0.998990 |
| 52 | 1 | -6.179161 | -2.350735 | 1.970188  |
| 53 | 1 | -4.231839 | -3.775273 | -1.580008 |
| 54 | 8 | 0.210061  | 0.078867  | -2.214300 |

|    |    |           |           |           |
|----|----|-----------|-----------|-----------|
| 55 | 8  | -1.893663 | 2.241877  | -2.830177 |
| 56 | 8  | -1.588170 | -0.510282 | 2.630691  |
| 57 | 8  | -0.534967 | -1.184855 | 0.429607  |
| 58 | 7  | 3.452812  | -0.467472 | -0.010863 |
| 59 | 7  | 1.680048  | 0.713376  | -0.632837 |
| 60 | 7  | -1.971794 | 0.861234  | 0.590690  |
| 61 | 16 | 1.989942  | -1.937770 | -1.513085 |
| 62 | 16 | -1.671117 | -0.662033 | 1.183048  |
| 63 | 1  | 0.196174  | 2.792674  | -0.413382 |
| 64 | 6  | -6.568697 | -3.959056 | -0.182776 |
| 65 | 1  | -6.595795 | -4.880870 | 0.409302  |
| 66 | 1  | -7.481590 | -3.399619 | 0.041467  |
| 67 | 1  | -6.581389 | -4.239619 | -1.238932 |

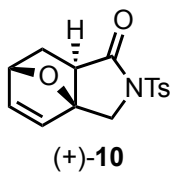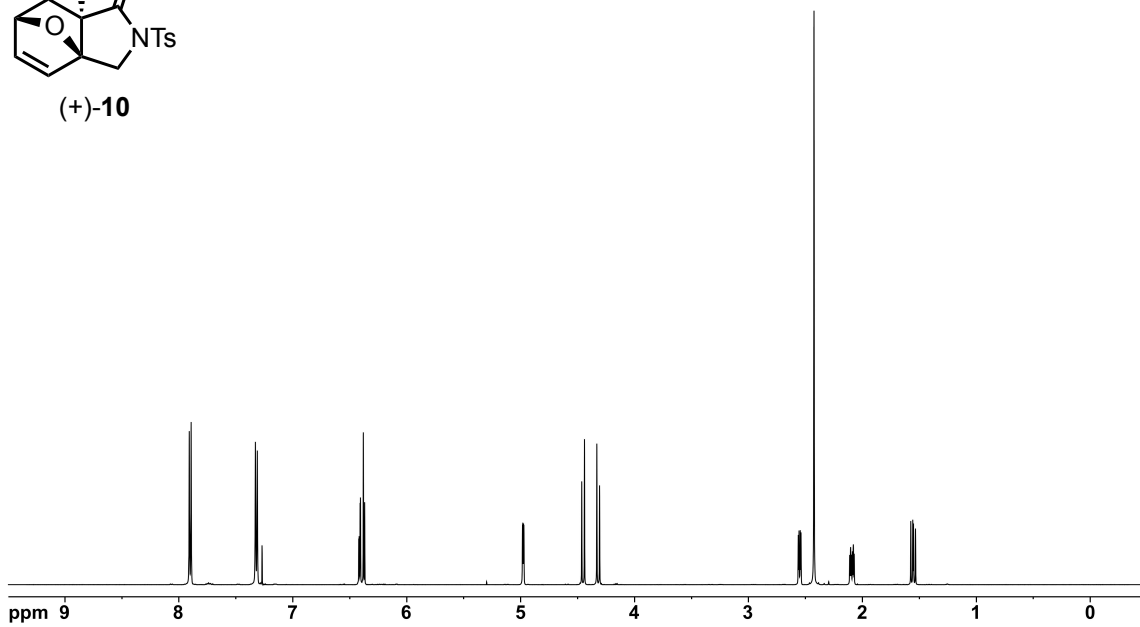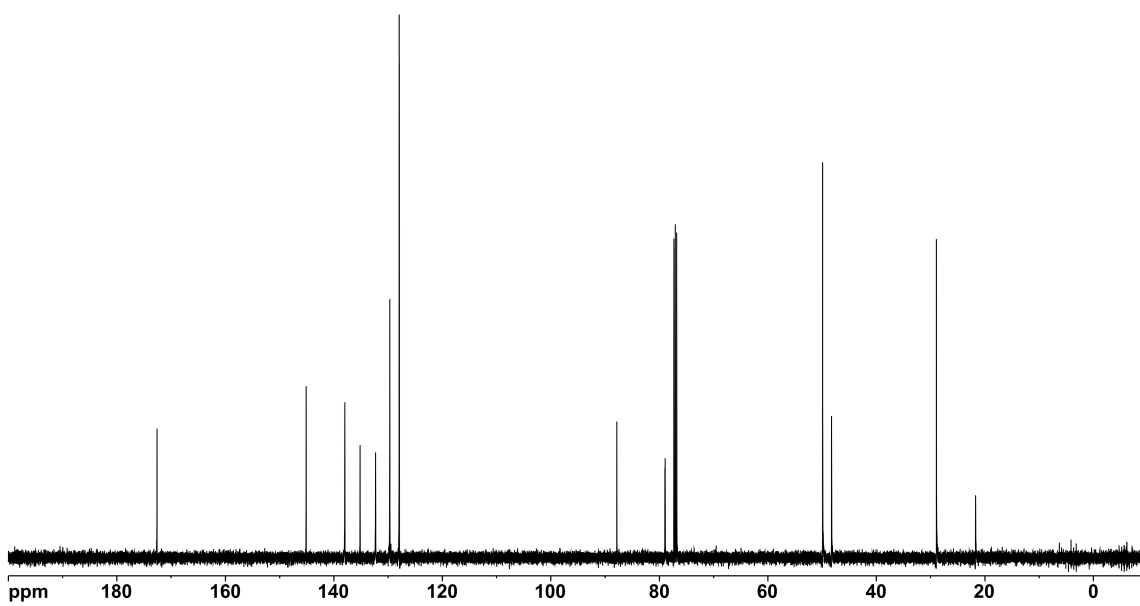

$^1\text{H}$  (500 MHz) and  $^{13}\text{C}$  NMR (125 MHz) spectra of lactam (+)-**10** in  $\text{CDCl}_3$

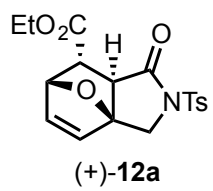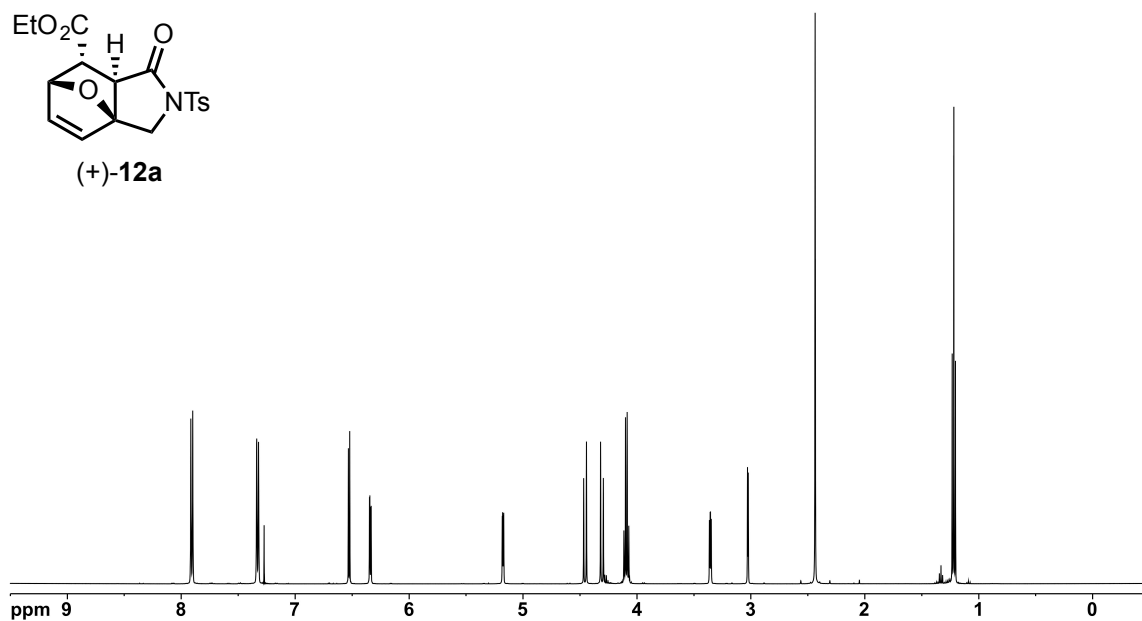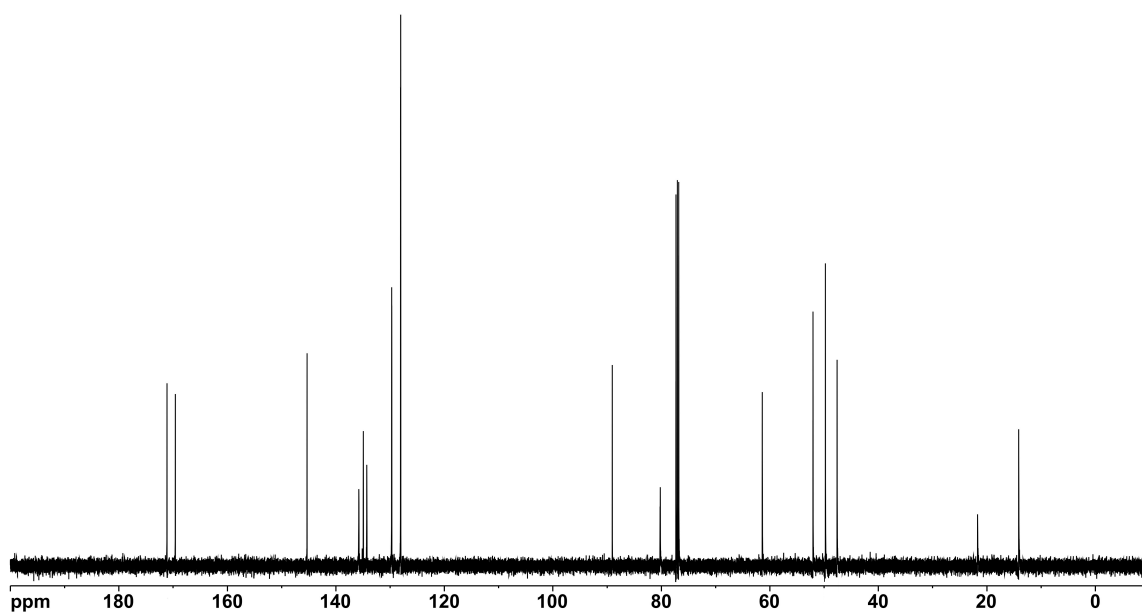

$^1\text{H}$  (500 MHz) and  $^{13}\text{C}$  NMR (125 MHz) spectra of lactam (+)-**12a** in  $\text{CDCl}_3$



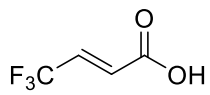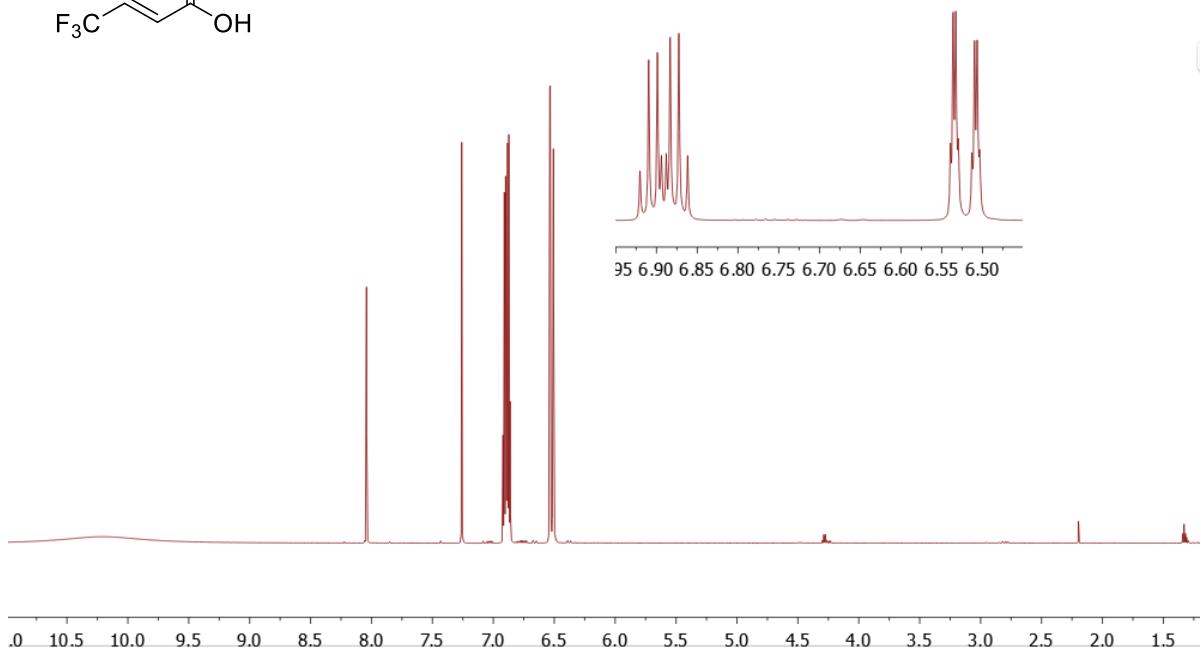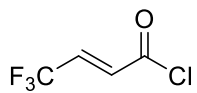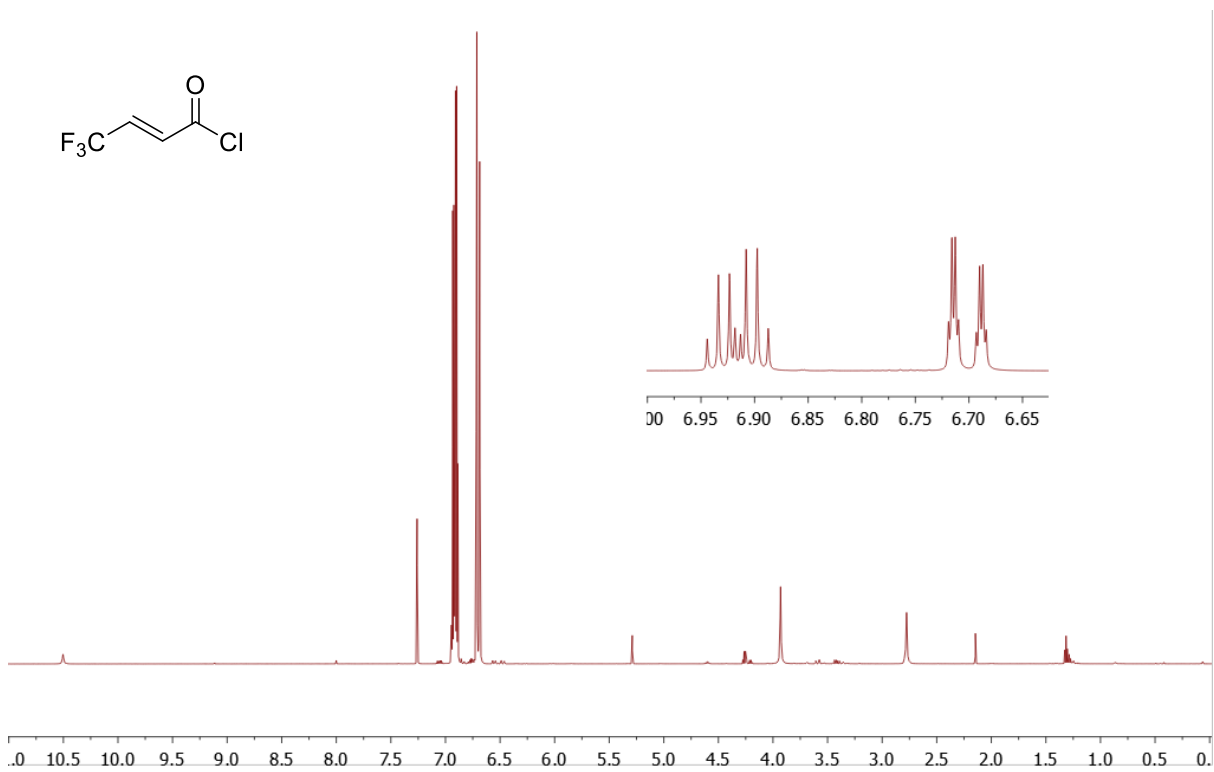

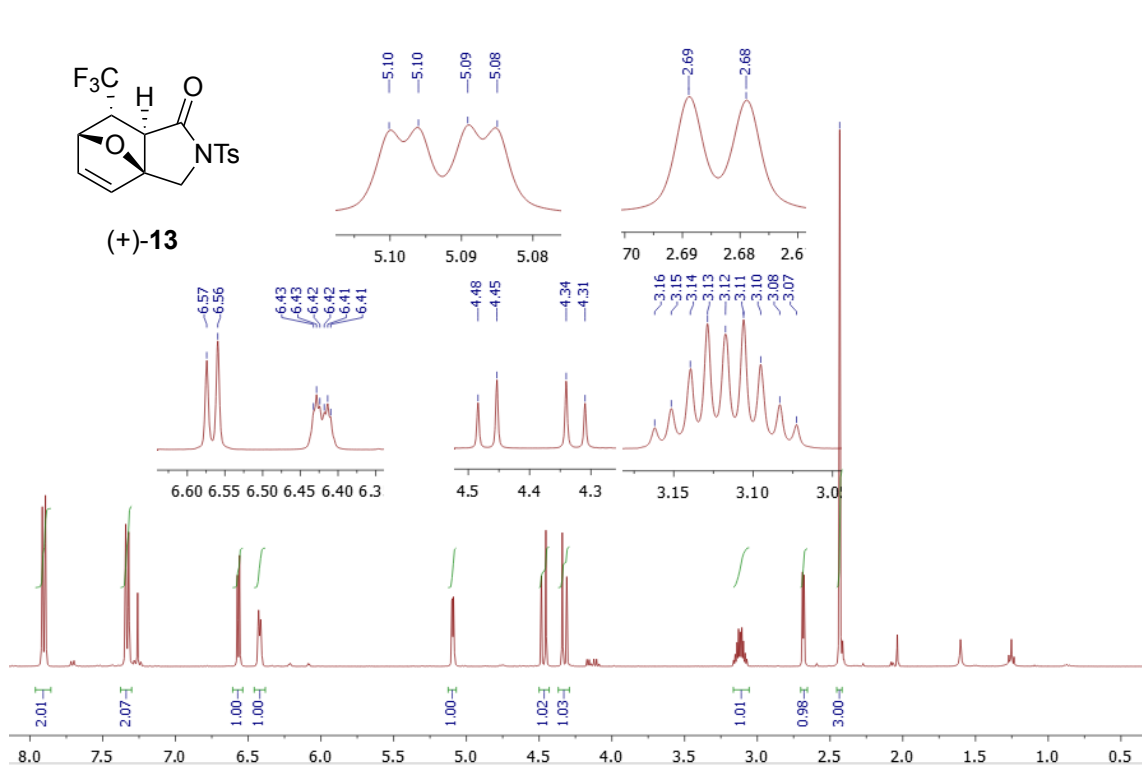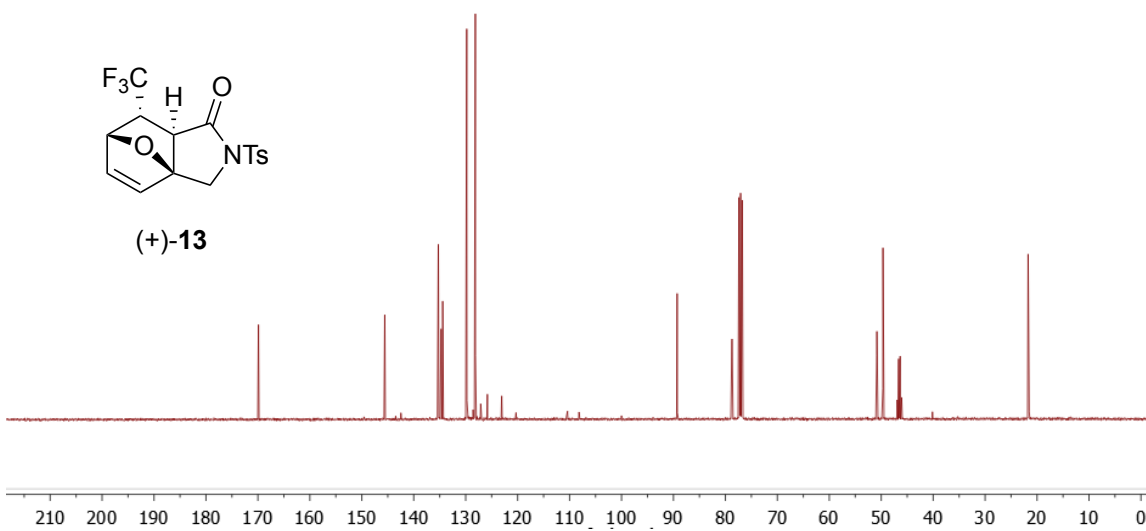

<sup>1</sup>H (400 MHz) and <sup>13</sup>C NMR (101 MHz) spectra of lactam (+)-**13** in CDCl<sub>3</sub>

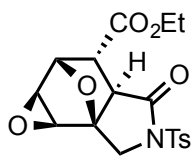

(+)-**14**

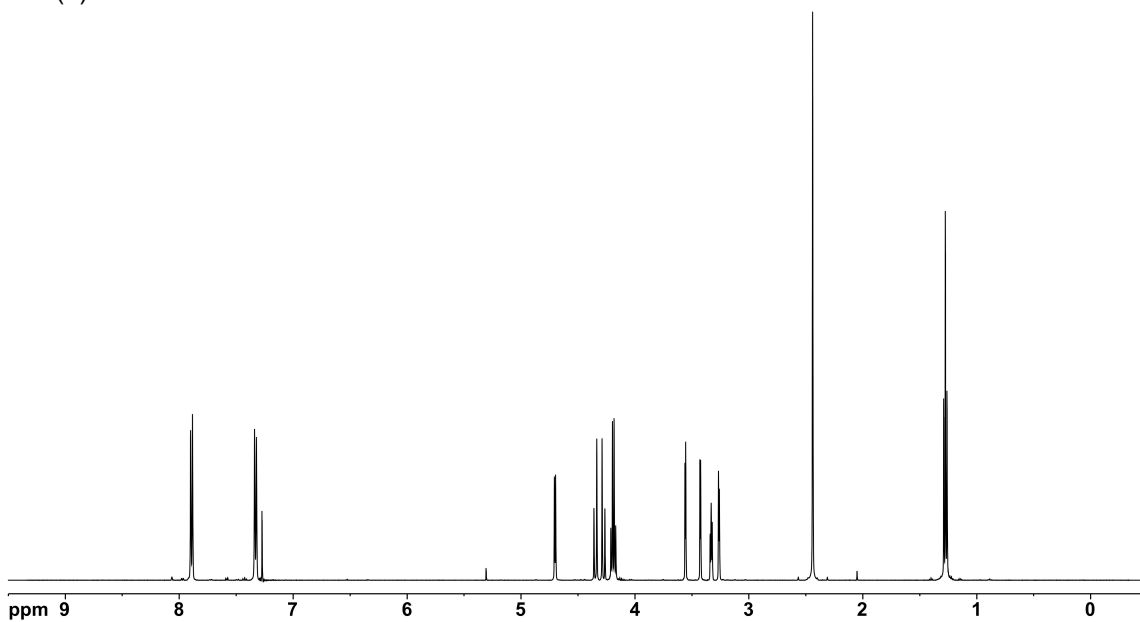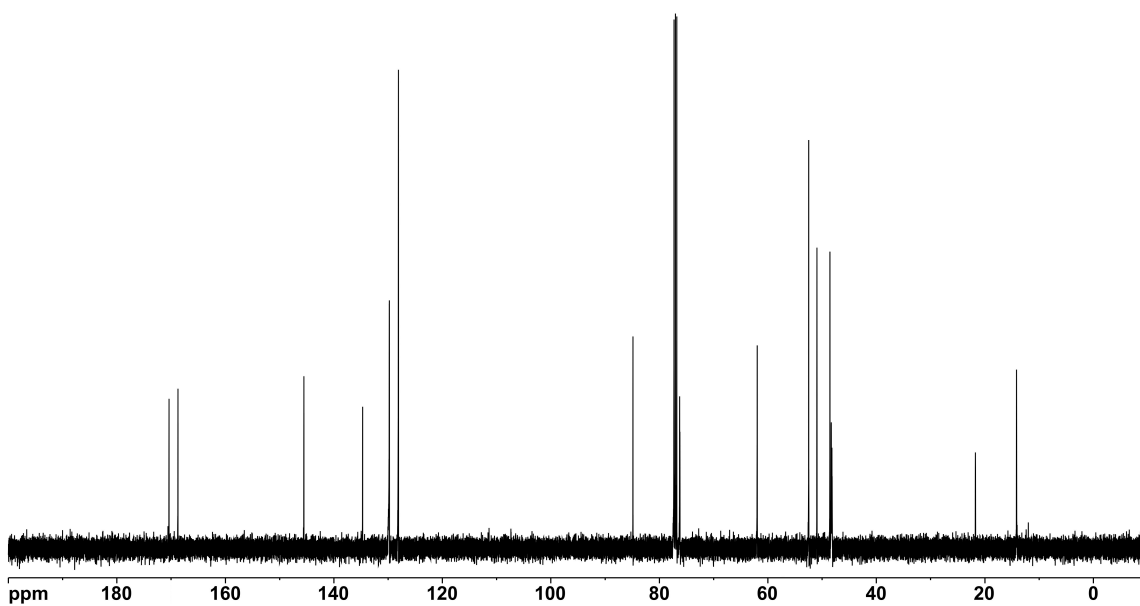

$^1\text{H}$  (500 MHz) and  $^{13}\text{C}$  NMR (125 MHz) spectra of epoxide (+)-**14** in  $\text{CDCl}_3$

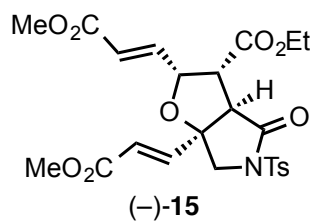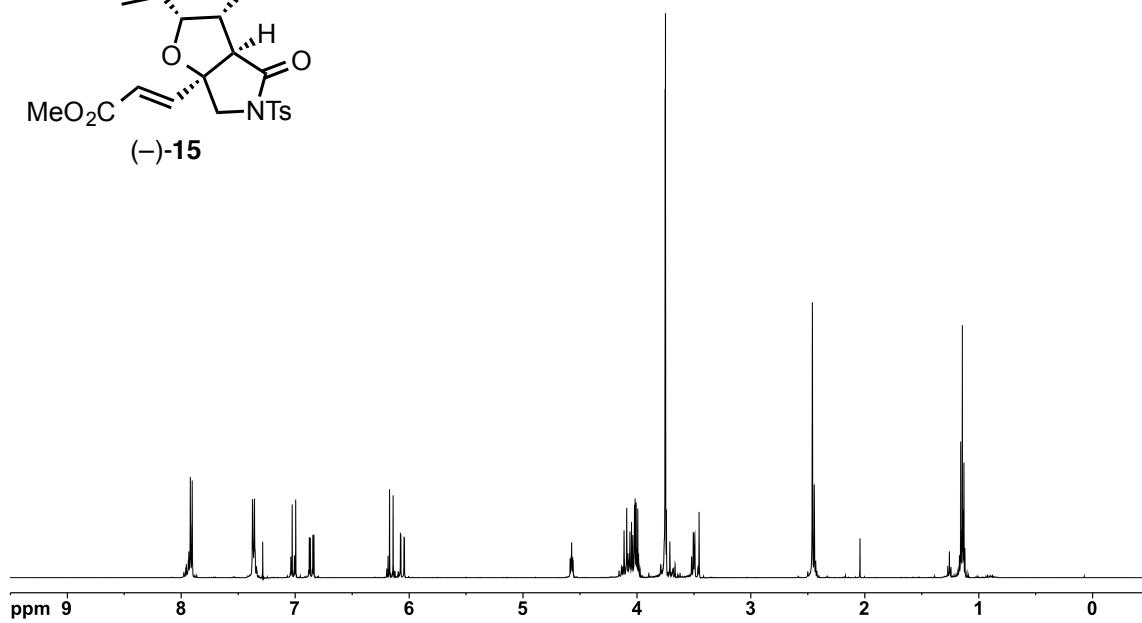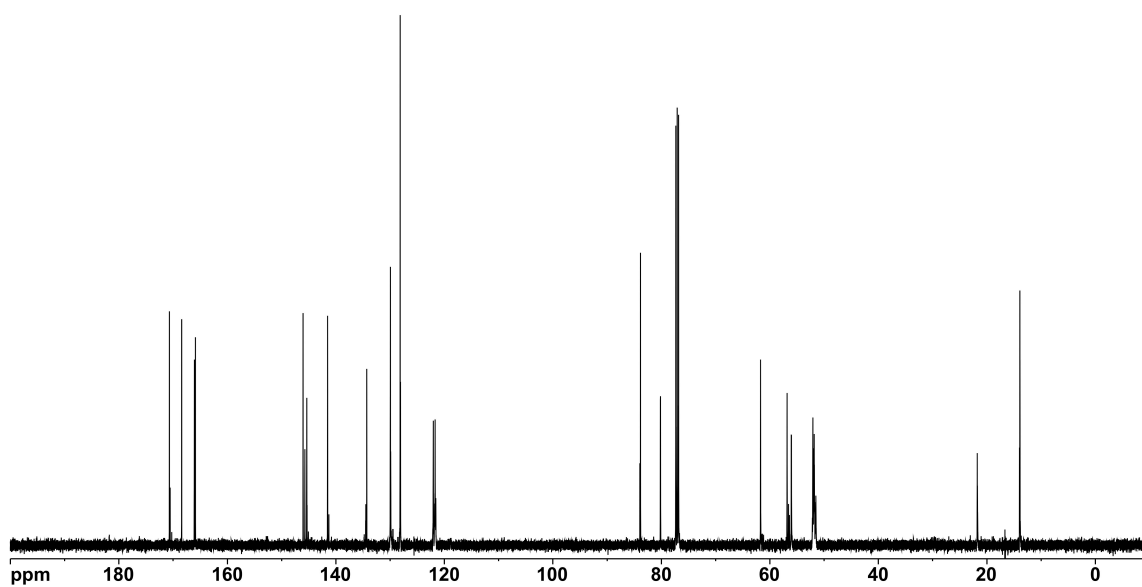

$^1\text{H}$  (500 MHz) and  $^{13}\text{C}$  NMR (125 MHz) spectra of lactam (-)-**15** in  $\text{CDCl}_3$

**Figure S2: Chiral HPLC determinations of enantiomeric excess of tricyclic  $\gamma$ -lactams (+)-10 and (+)-12a:**

**Chiral HPLC analysis of tricyclic  $\gamma$ -lactam (+)-10:** Chiralcel AS-H column: hexanes:<sup>i</sup>PrOH = 40:60, flow rate 1.0 mL/min,  $\lambda$  = 230 nm:  $t_{\text{minor}}$  = 12.1 min,  $t_{\text{major}}$  = 14.8 min; 91% *ee*.

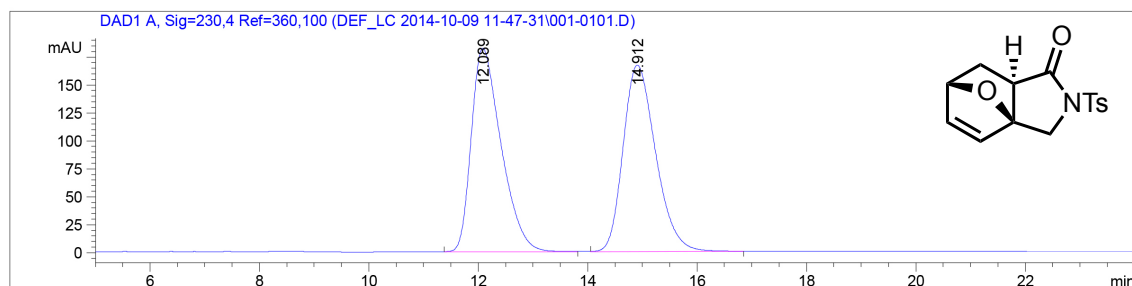

Signal 1: DAD1 A, Sig=230,4 Ref=360,100

| Peak # | RetTime [min] | Type | Width [min] | Area [mAU*s] | Height [mAU] | Area %  |
|--------|---------------|------|-------------|--------------|--------------|---------|
| 1      | 12.089        | VB   | 0.5743      | 6905.38037   | 182.16231    | 50.0142 |
| 2      | 14.912        | BB   | 0.6347      | 6901.46826   | 166.79213    | 49.9858 |

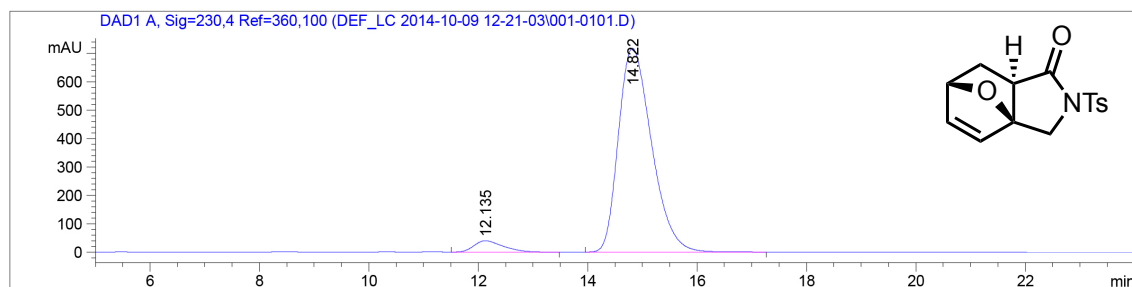

Signal 1: DAD1 A, Sig=230,4 Ref=360,100

| Peak # | RetTime [min] | Type | Width [min] | Area [mAU*s] | Height [mAU] | Area %  |
|--------|---------------|------|-------------|--------------|--------------|---------|
| 1      | 12.135        | VB   | 0.5555      | 1479.92871   | 40.01673     | 4.6714  |
| 2      | 14.822        | BB   | 0.6515      | 3.02009e4    | 716.84735    | 95.3286 |

## Determination of enantiomeric excess of tricyclic $\gamma$ -lactam (+)-12a:

**Chiral HPLC analysis of tricyclic  $\gamma$ -lactam (+)-12a:** Chiralcel AD-H column: hexanes:PrOH = 60:40, flow rate 0.5 mL/min,  $\lambda = 230$  nm:  $t_{\text{minor}} = 27.2$  min,  $t_{\text{major}} = 30.9$  min; 94% *ee*.

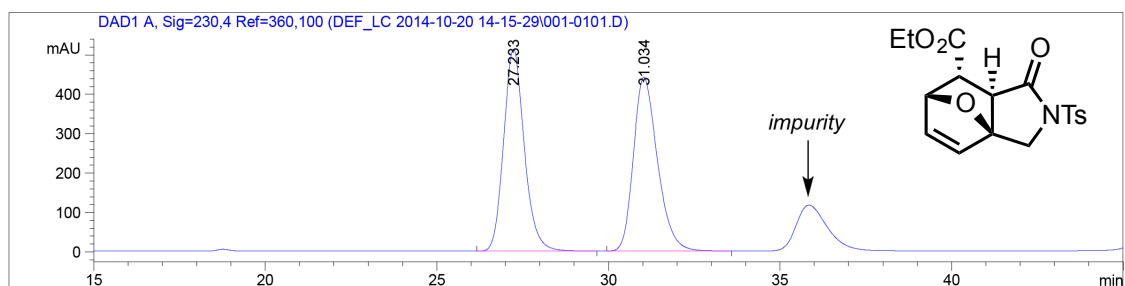

Signal 1: DAD1 A, Sig=230,4 Ref=360,100

| Peak # | RetTime [min] | Type | Width [min] | Area [mAU*s] | Height [mAU] | Area %  |
|--------|---------------|------|-------------|--------------|--------------|---------|
| 1      | 27.233        | BB   | 0.6407      | 2.14784e4    | 512.79865    | 49.9649 |
| 2      | 31.034        | BB   | 0.7523      | 2.15086e4    | 441.53778    | 50.0351 |

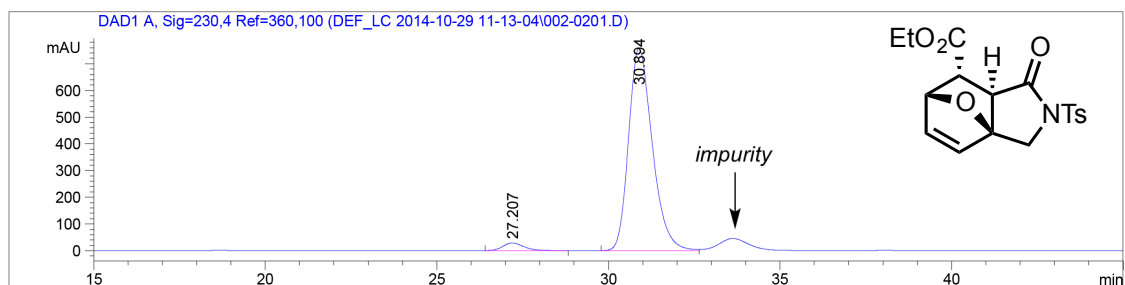

Signal 1: DAD1 A, Sig=230,4 Ref=360,100

| Peak # | RetTime [min] | Type | Width [min] | Area [mAU*s] | Height [mAU] | Area %  |
|--------|---------------|------|-------------|--------------|--------------|---------|
| 1      | 27.207        | BB   | 0.6536      | 1205.83008   | 28.50200     | 3.2022  |
| 2      | 30.894        | BV   | 0.7379      | 3.64501e4    | 756.85626    | 96.7978 |

## Determination of enantiomeric excess of tricyclic $\gamma$ -lactam (+)-13:

**Chiral HPLC analysis of tricyclic  $\gamma$ -lactam (+)-13:** Chiralcel AD-H column: hexanes:PrOH = 60:40, flow rate 1.0 mL/min,  $\lambda = 230$  nm:  $t_{\text{minor}} = 8.62$  min,  $t_{\text{major}} = 7.83$  min; 85% ee.

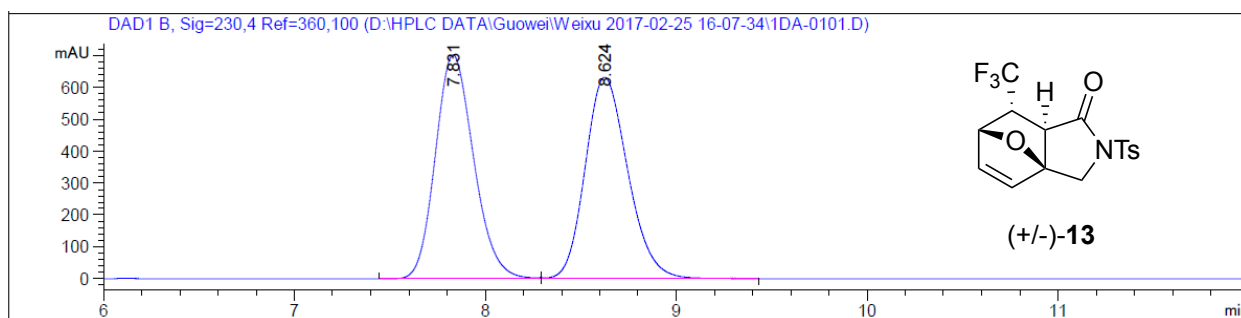

Signal 4: DAD1 D, Sig=230,4 Ref=360,100

| Peak # | RetTime [min] | Type | Width [min] | Area [mAU*s] | Height [mAU] | Area %  |
|--------|---------------|------|-------------|--------------|--------------|---------|
| 1      | 7.831         | BV   | 0.2116      | 9769.82617   | 701.05981    | 49.9963 |
| 2      | 8.624         | VB   | 0.2362      | 9771.26660   | 630.81213    | 50.0037 |

Totals : 1.95411e4 1331.87195

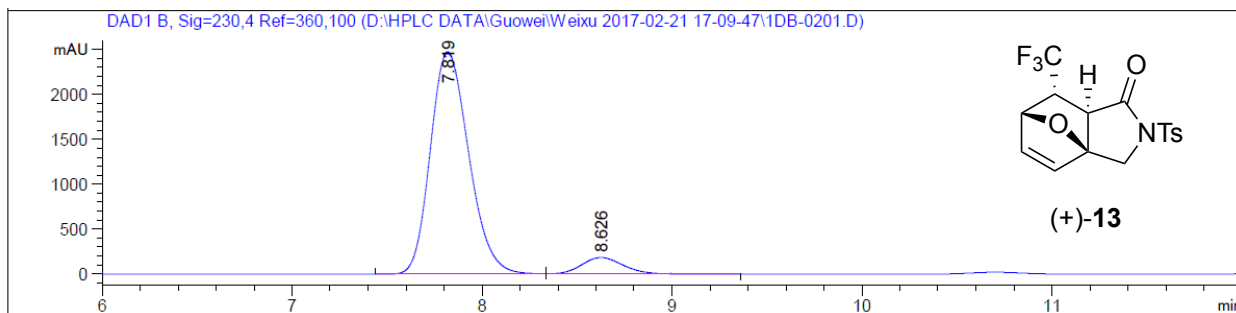

Signal 2: DAD1 B, Sig=230,4 Ref=360,100

| Peak # | RetTime [min] | Type | Width [min] | Area [mAU*s] | Height [mAU] | Area %  |
|--------|---------------|------|-------------|--------------|--------------|---------|
| 1      | 7.819         | BV   | 0.1680      | 3.46395e4    | 2463.77759   | 92.3583 |
| 2      | 8.626         | VB   | 0.2208      | 2866.07642   | 185.48206    | 7.6417  |

Totals : 3.75056e4 2649.25964
